# Supplementary material for: Antitubercular activity of 2-mercaptobenzothiazole derivatives targeting Mycobacterium tuberculosis type II NADH dehydrogenase
Source: Royal Society of Chemistry journal article supplement (doi:10.1039/d4md00118d), 2024-01-01

## Supporting Information

### Antitubercular activity of 2-mercaptobenzothiazole derivatives targeting *Mycobacterium tuberculosis* type II NADH dehydrogenase

Pallavi Saha,<sup>a</sup> Shashikanta Sau,<sup>b</sup> Nitin Pal Kalia,<sup>\*b</sup> Deepak K Sharma<sup>\*a</sup>

<sup>a</sup>Department of Pharmaceutical Engg. and Tech., IIT-Banaras Hindu University, Varanasi, UP, 221005, email id: [deepak.phe@itbhu.ac.in](mailto:deepak.phe@itbhu.ac.in)

<sup>b</sup>Department of Pharmacology and Toxicology, NIPER-Hyderabad, Hyderabad, 500037.

#### Table of Contents

|    |                                                     |        |
|----|-----------------------------------------------------|--------|
| 1. | ATP depletion assay graph.....                      | S2     |
| 2. | MTT assay graph.....                                | S2     |
| 3. | <i>In silico</i> docking data.....                  | S3     |
| 4. | <sup>1</sup> H and <sup>13</sup> C NMR Spectra..... | S4-S39 |

## ATP depletion assay graph

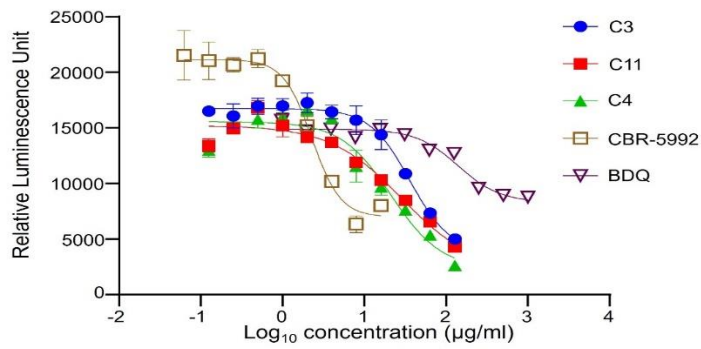

**S1.** Intracellular ATP levels were quantified using a luciferase-based assay against *Mtb* H37Rv mc<sup>2</sup> 6230.

## MTT assay graph:

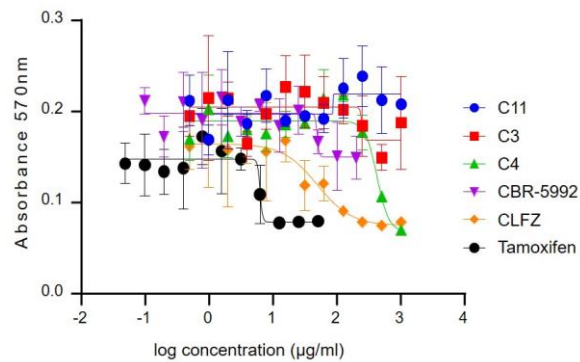

**S2.** Cytotoxicity of the test active molecules (C3, C4 and C11) and CBR-5992 against HepG2 cell lines

## In silico docking data:

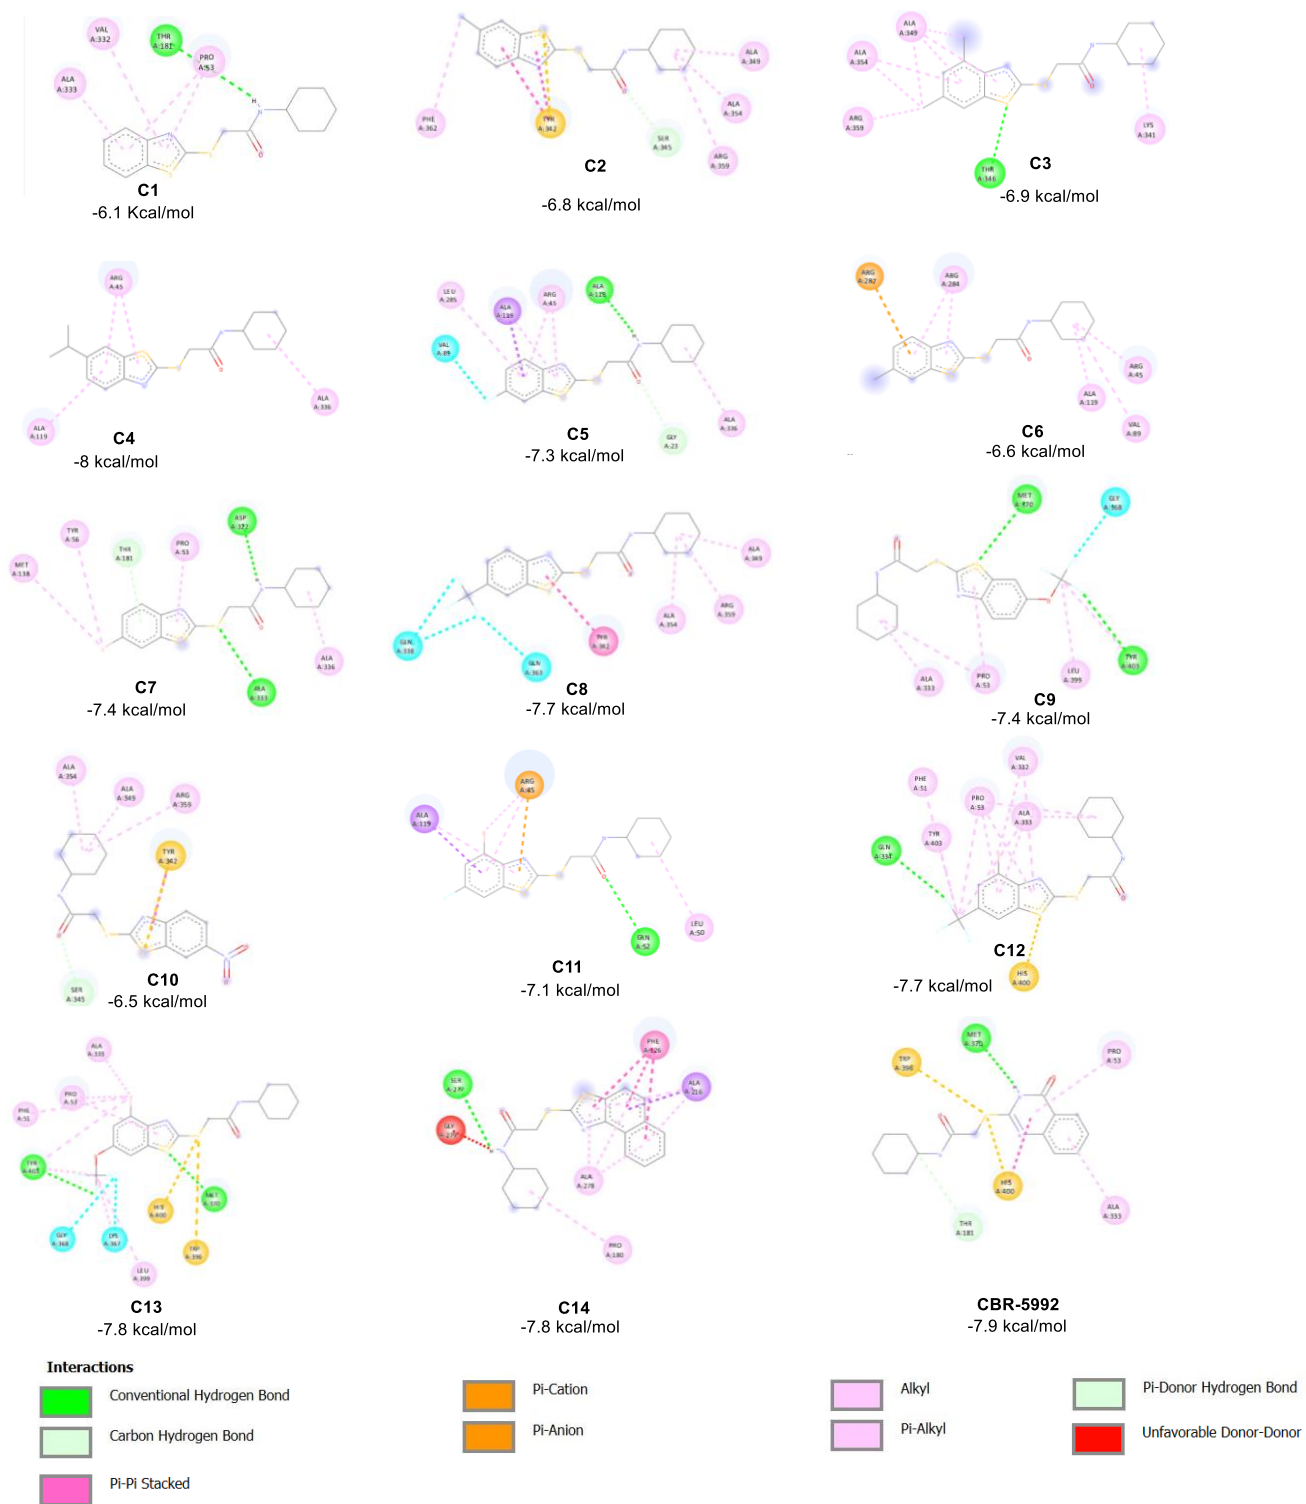

### S3. Binding interactions of C1-C14 and CBR-5992.

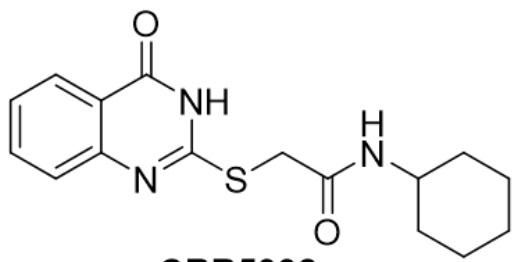

**CBR5992**

<sup>1</sup>H NMR (DMSO-d<sub>6</sub>, 500 MHz)

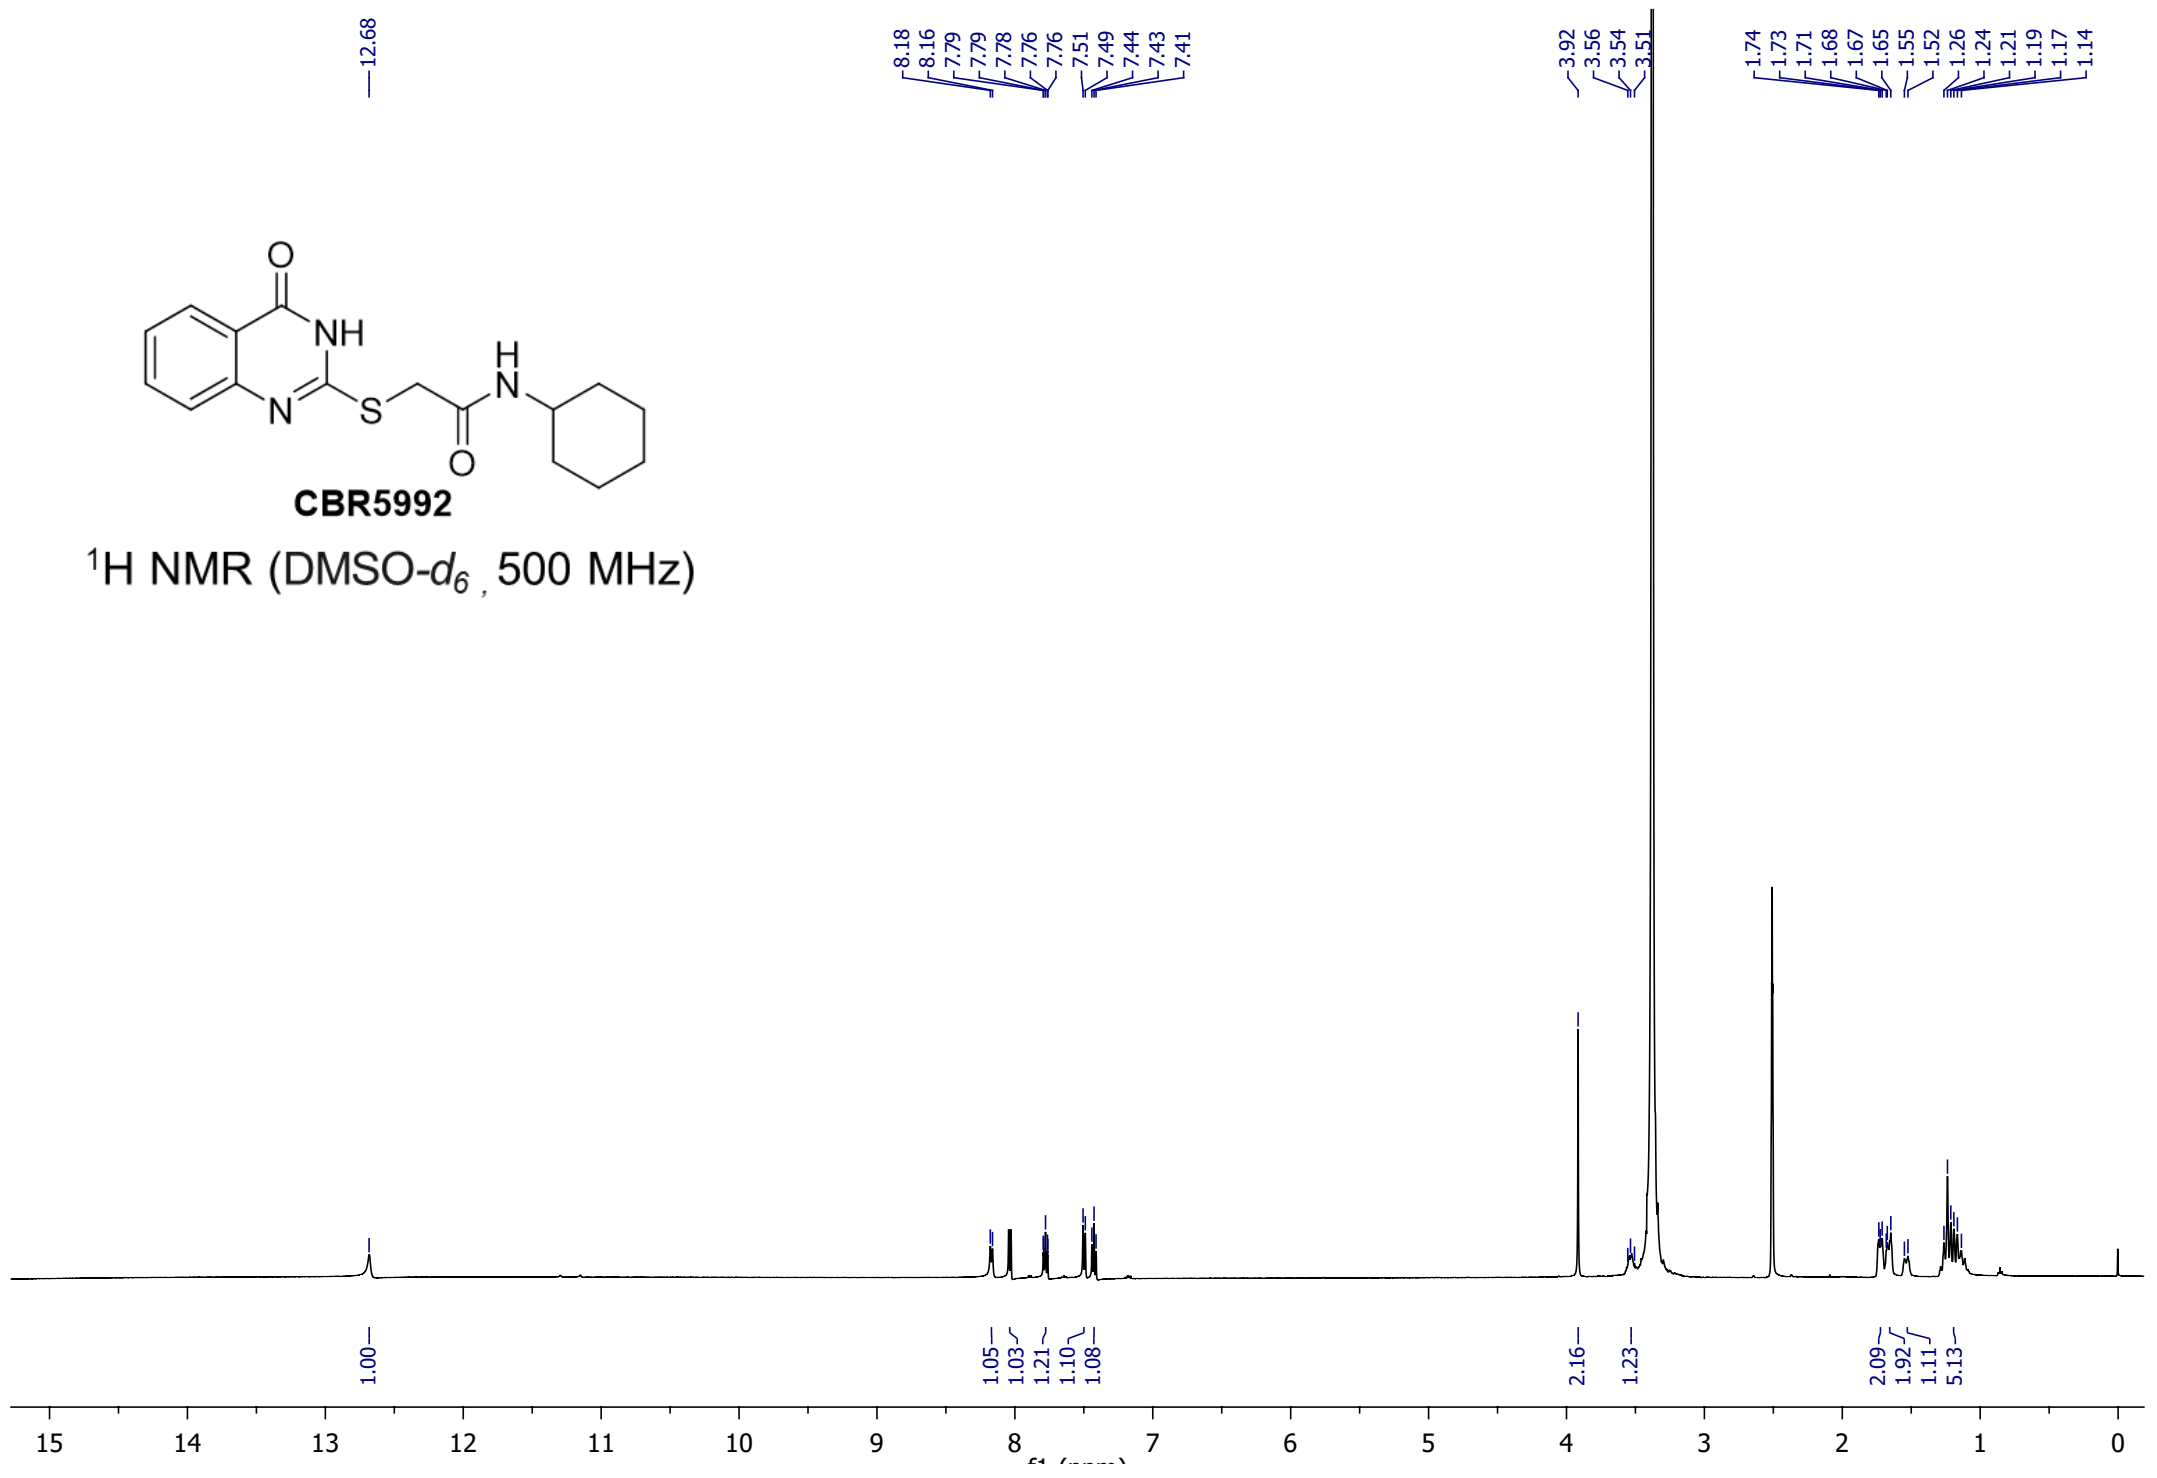

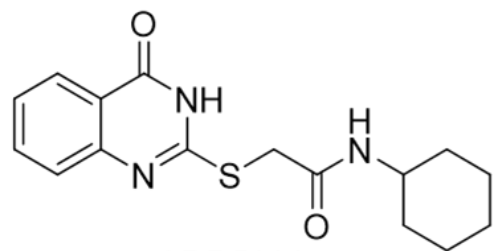

**CBR5992**

$^{13}\text{C}$  NMR (DMSO- $d_6$ , 125 MHz)

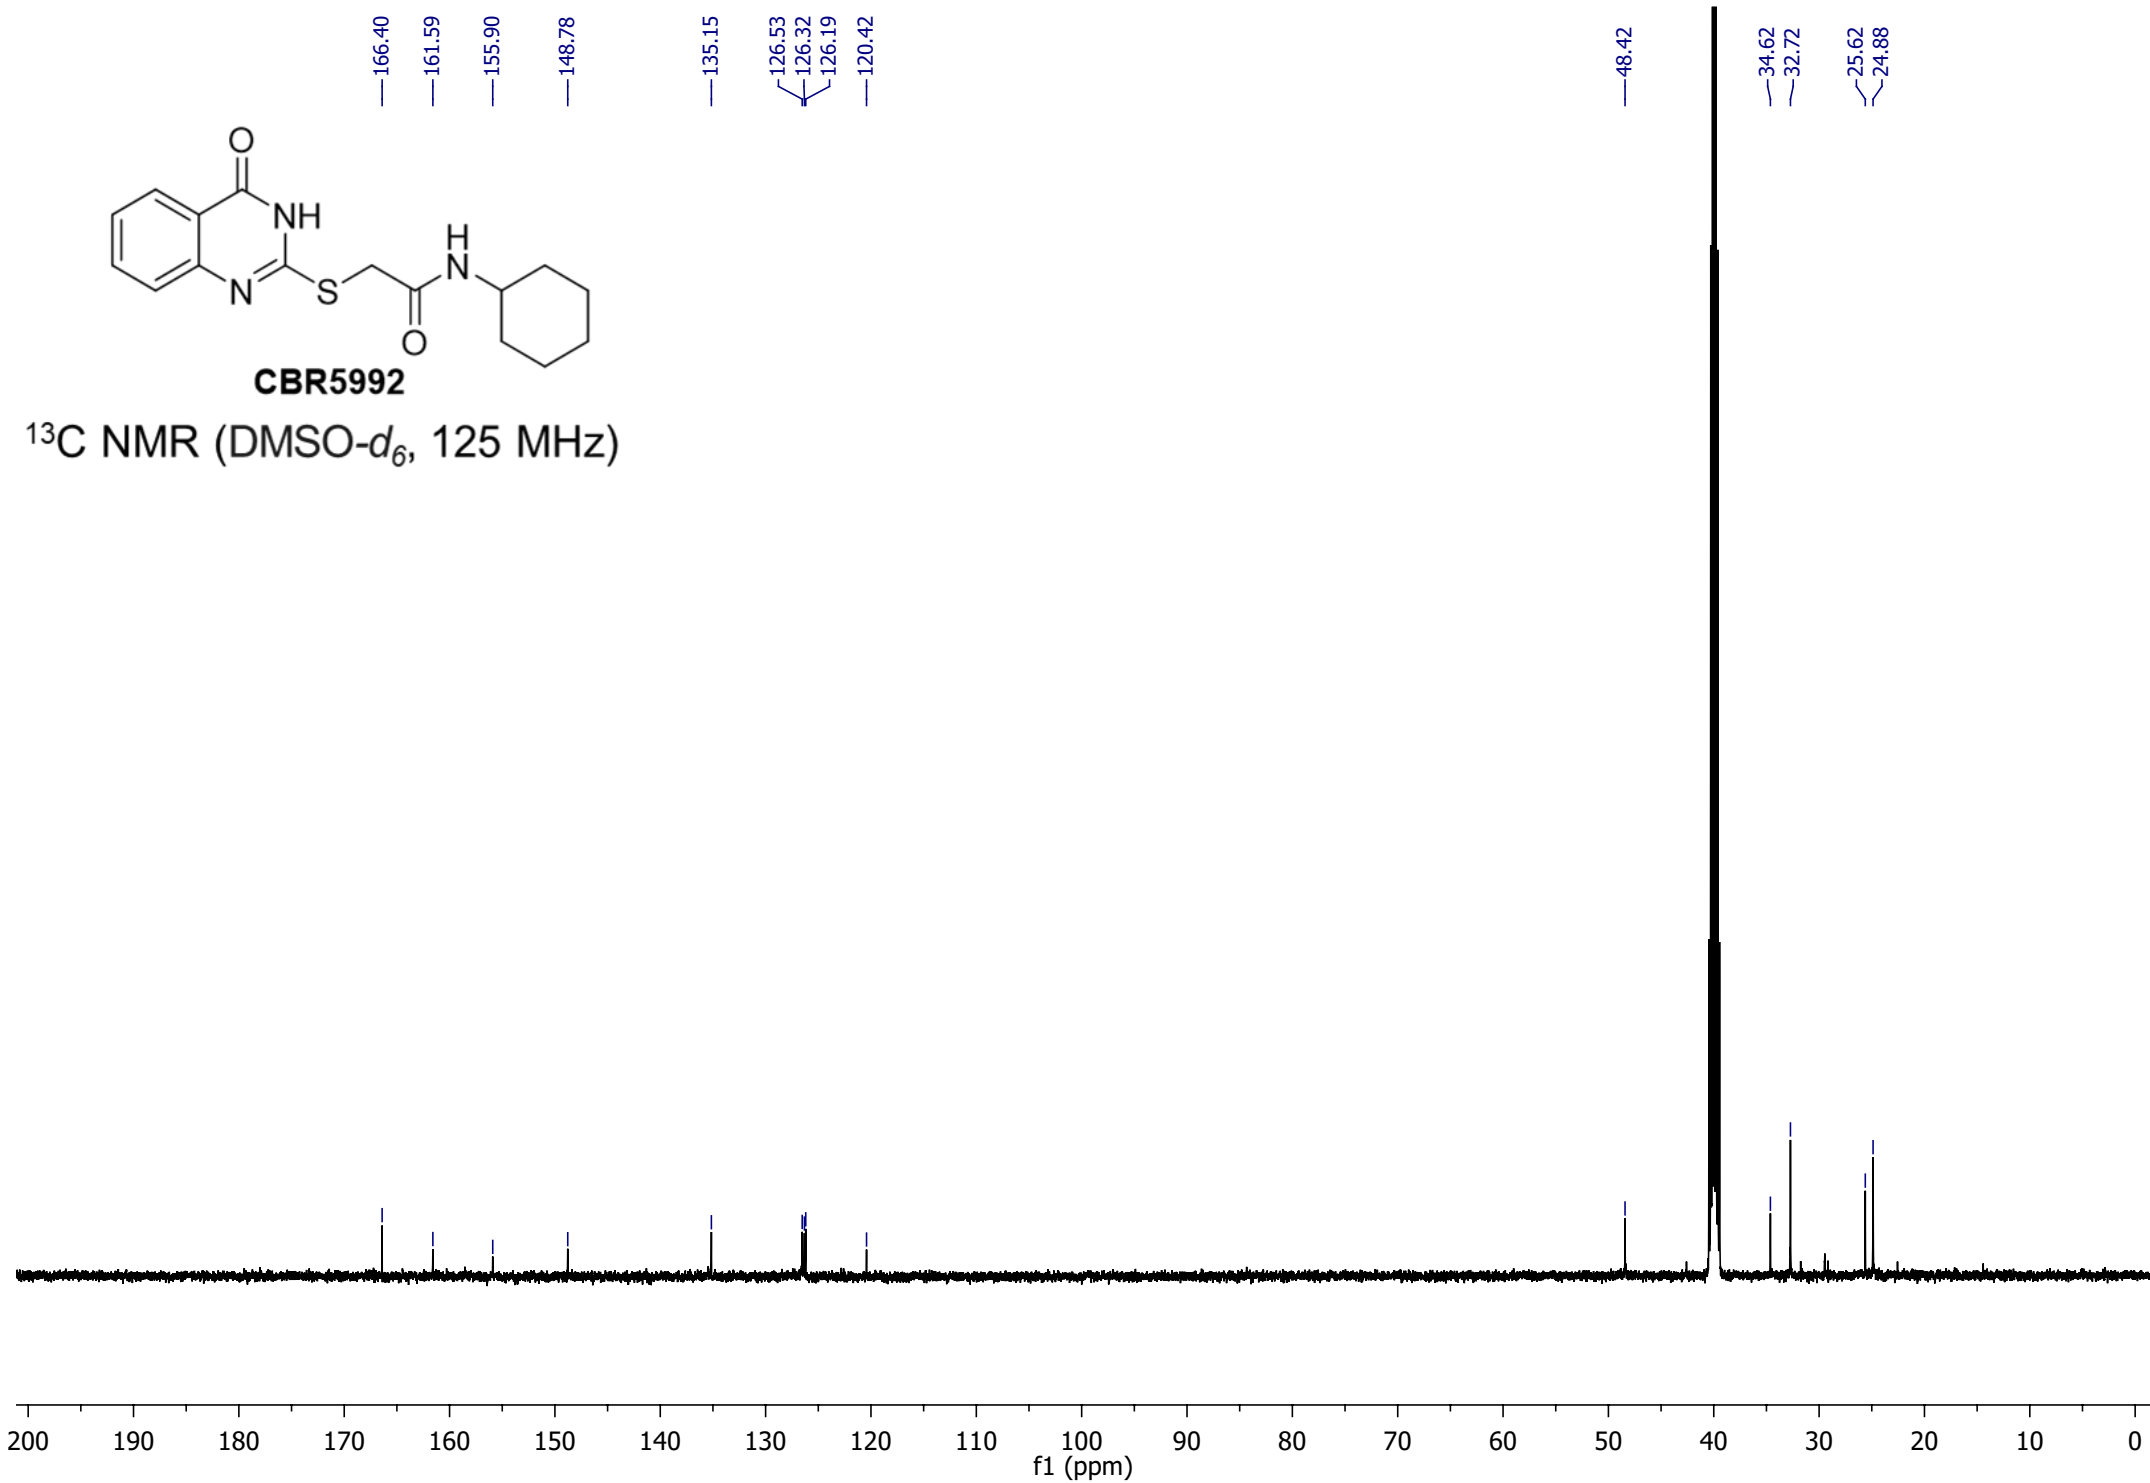

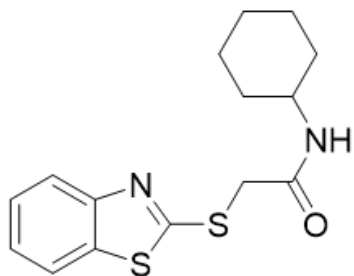

C1

$^1\text{H}$  NMR (DMSO- $d_6$ , 500 MHz)

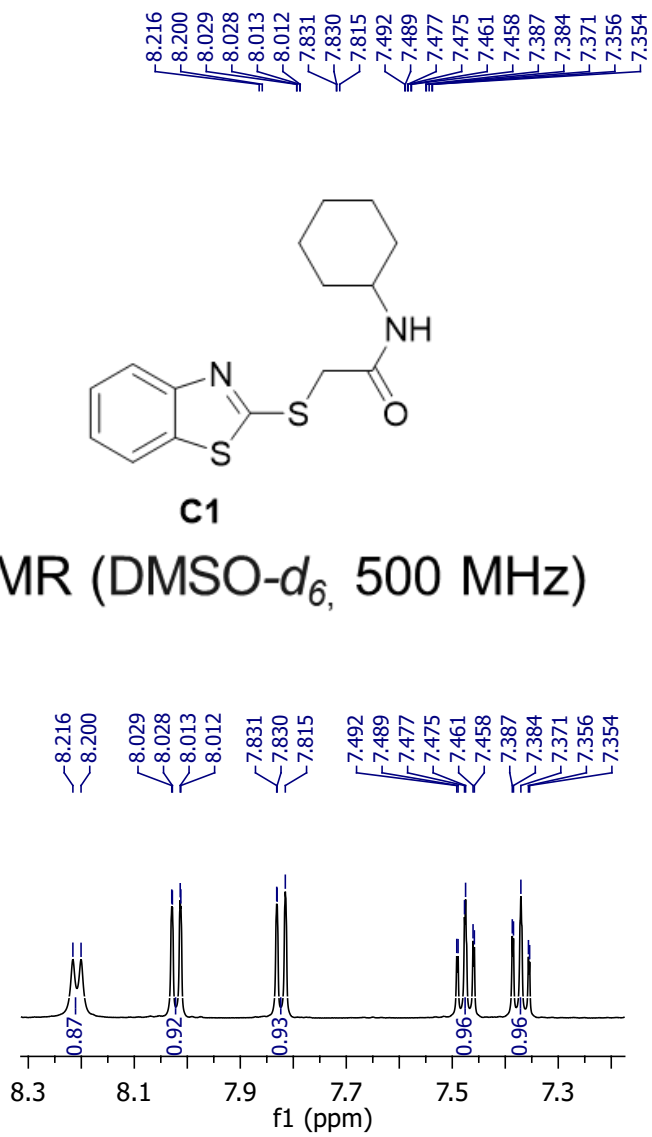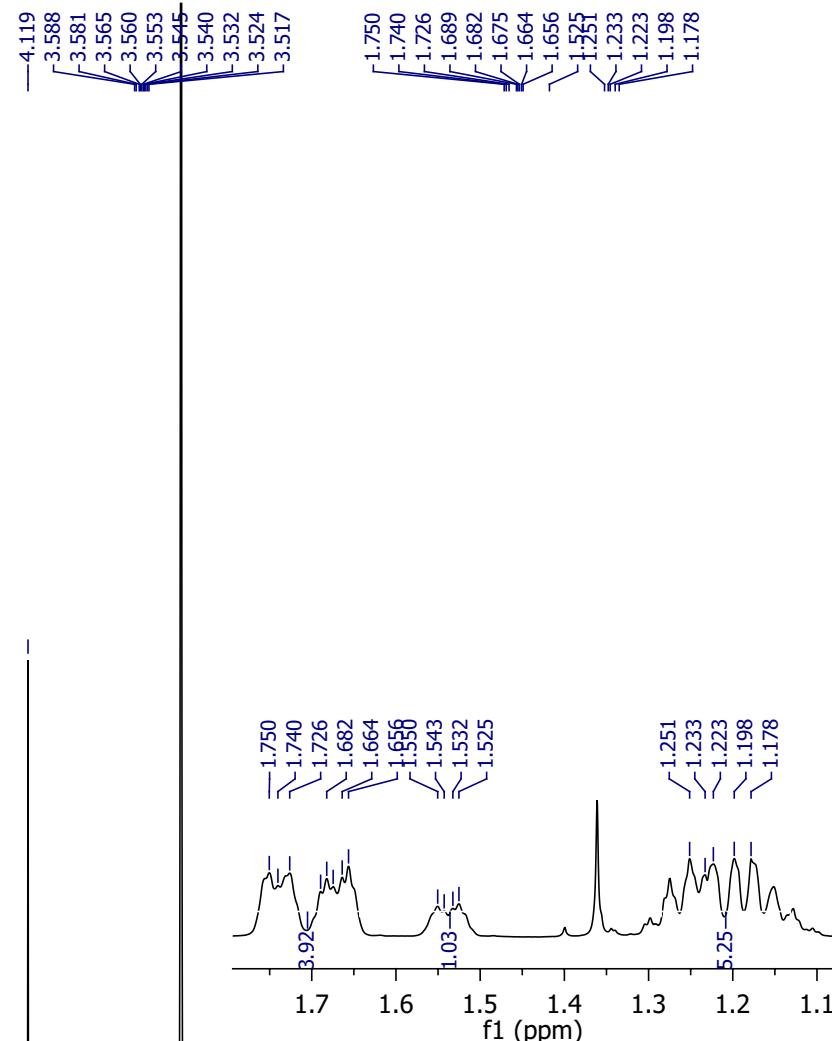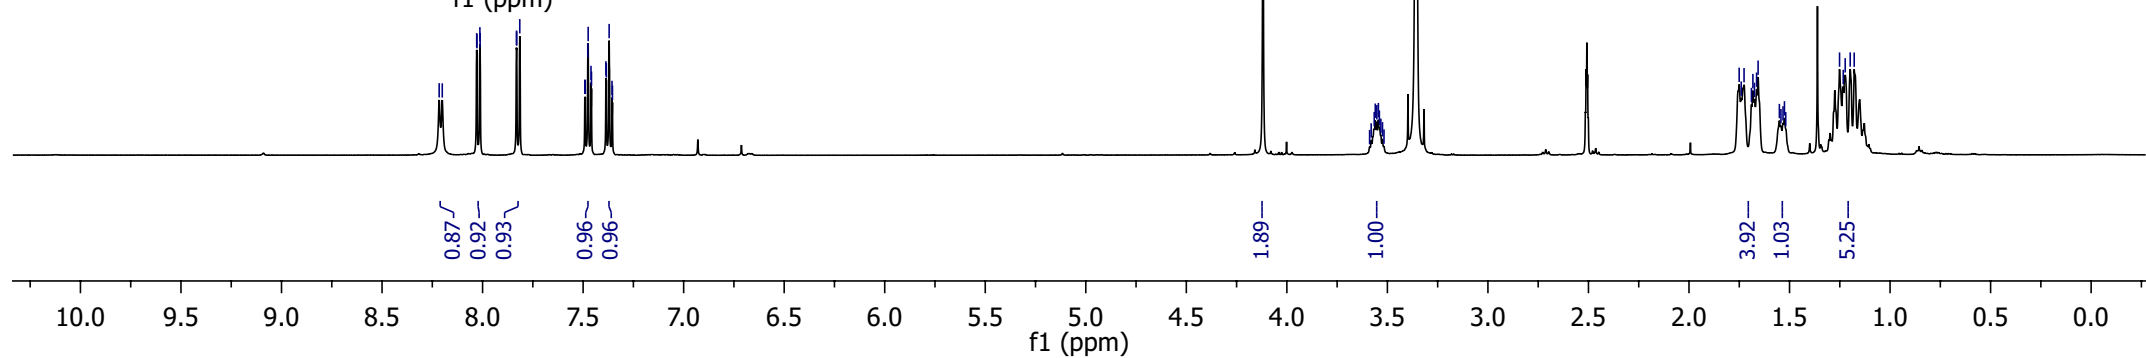

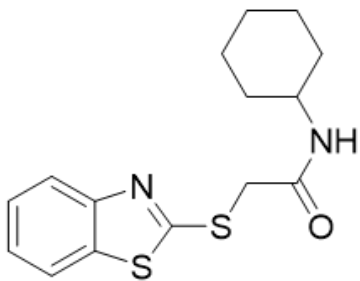

C1

$^{13}\text{C}$  NMR (DMSO- $d_6$ , 125 MHz)

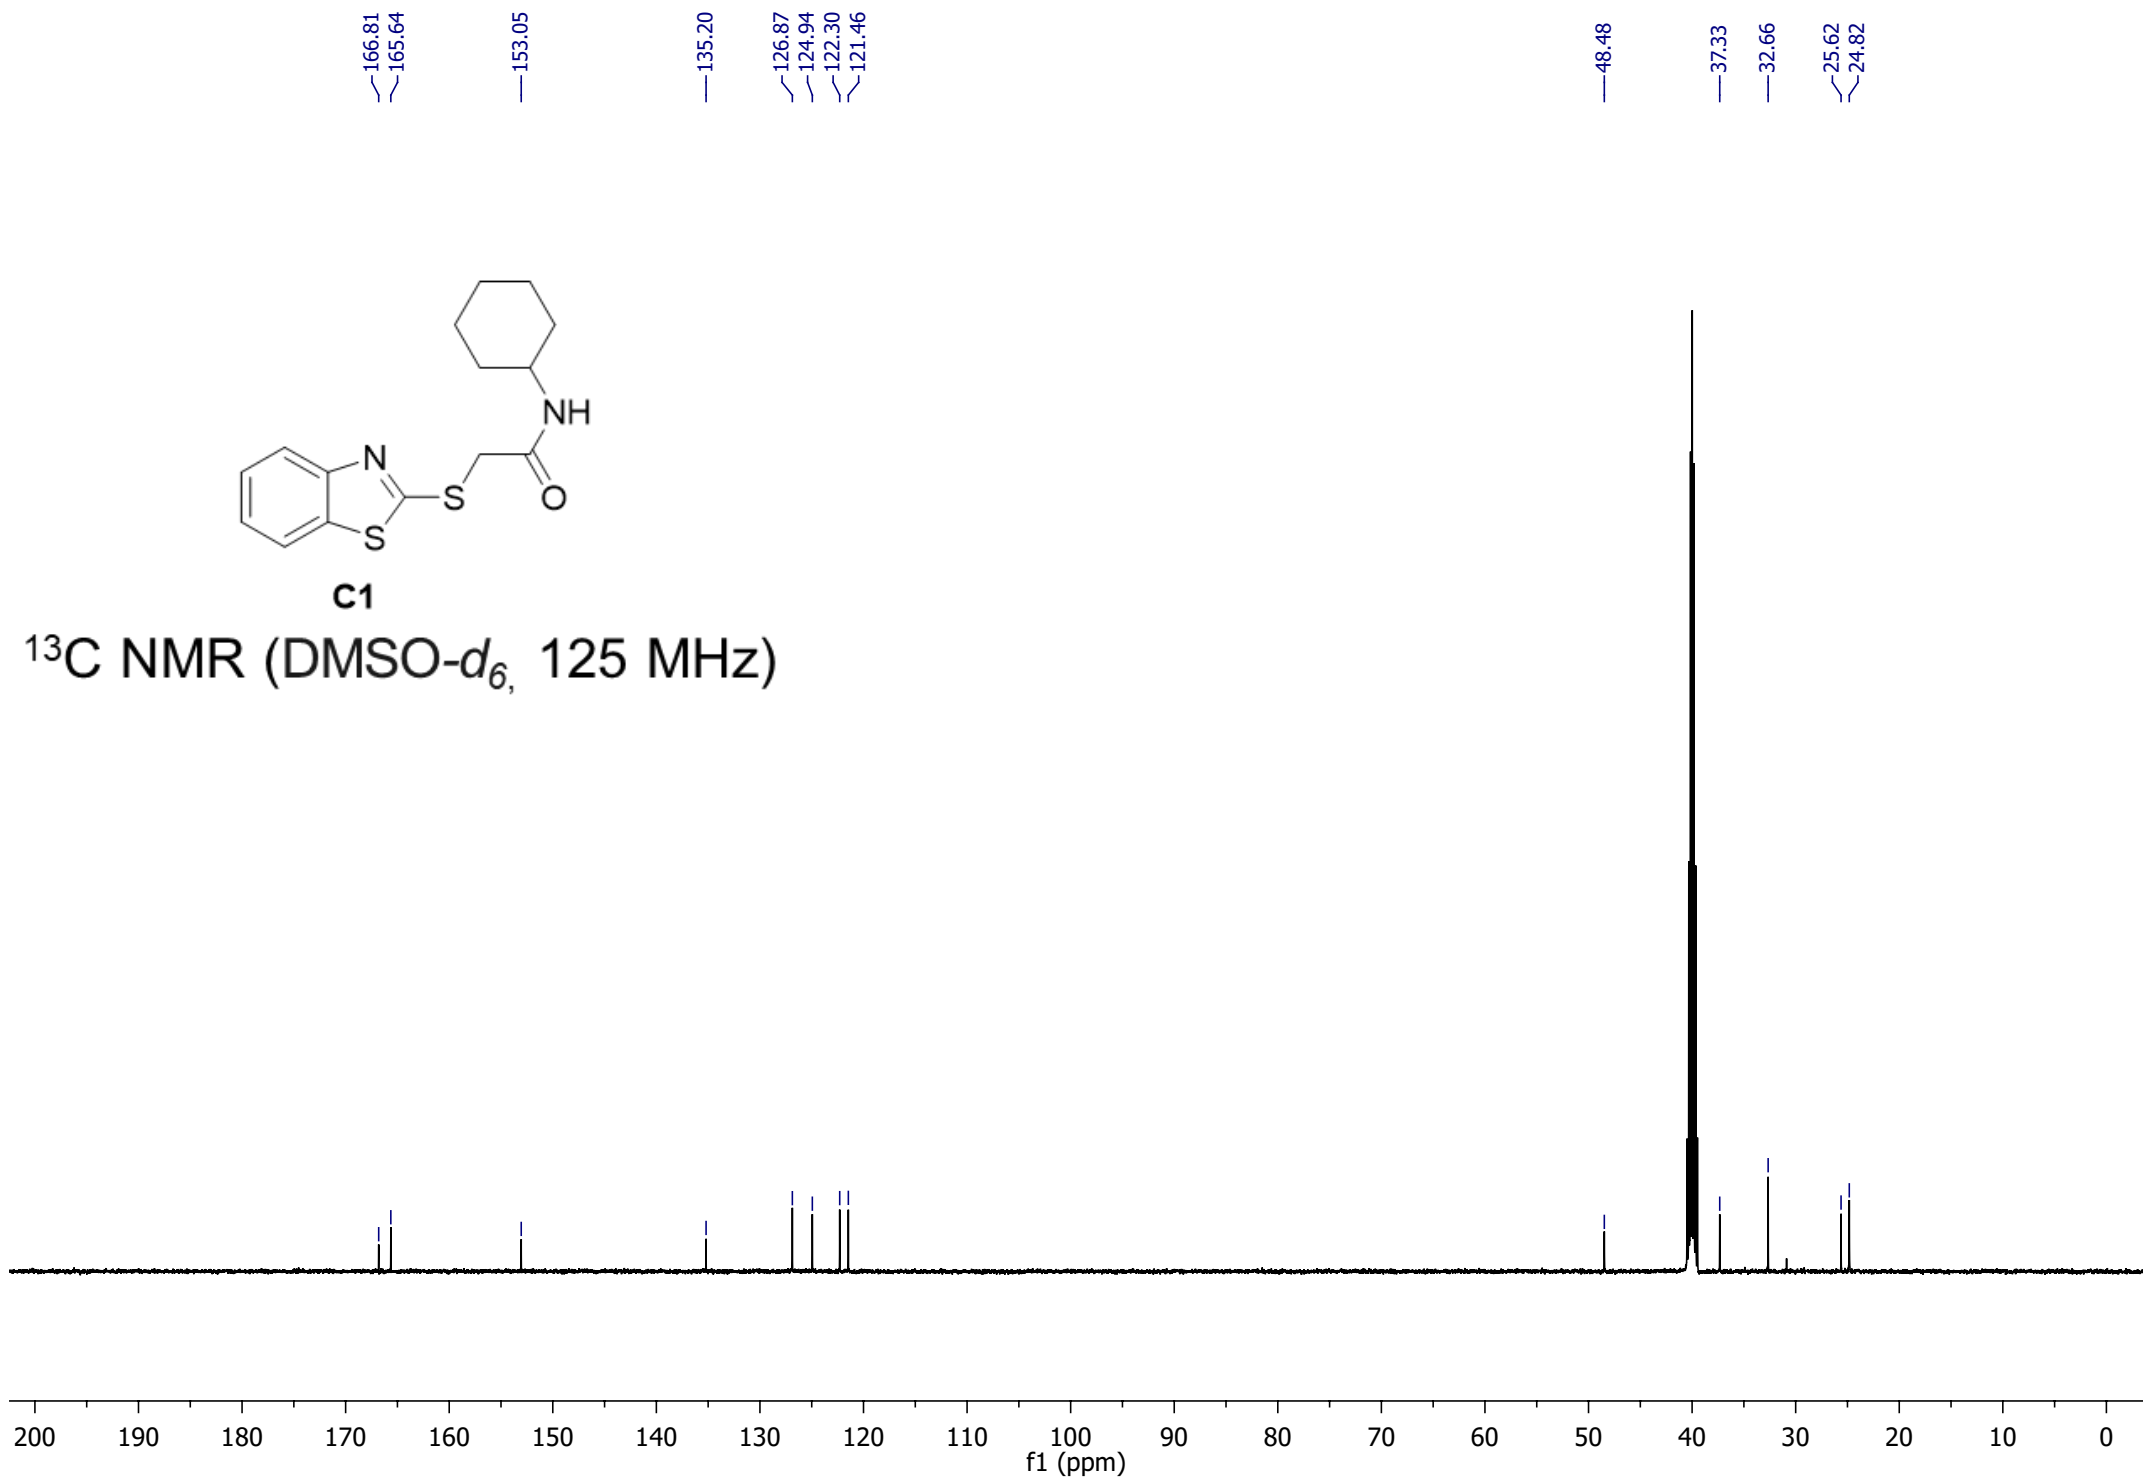

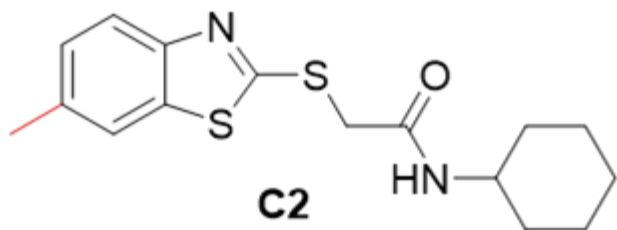

8.21  
8.20  
7.81  
7.71  
7.69  
7.30  
7.28

4.09  
3.54

2.41  
1.74  
1.72  
1.69  
1.68  
1.66  
1.65  
1.55  
1.53  
1.52  
1.30  
1.27  
1.25  
1.22  
1.19  
1.17  
1.15  
1.13

$^1\text{H}$  NMR (DMSO- $d_6$ , 500 MHz)

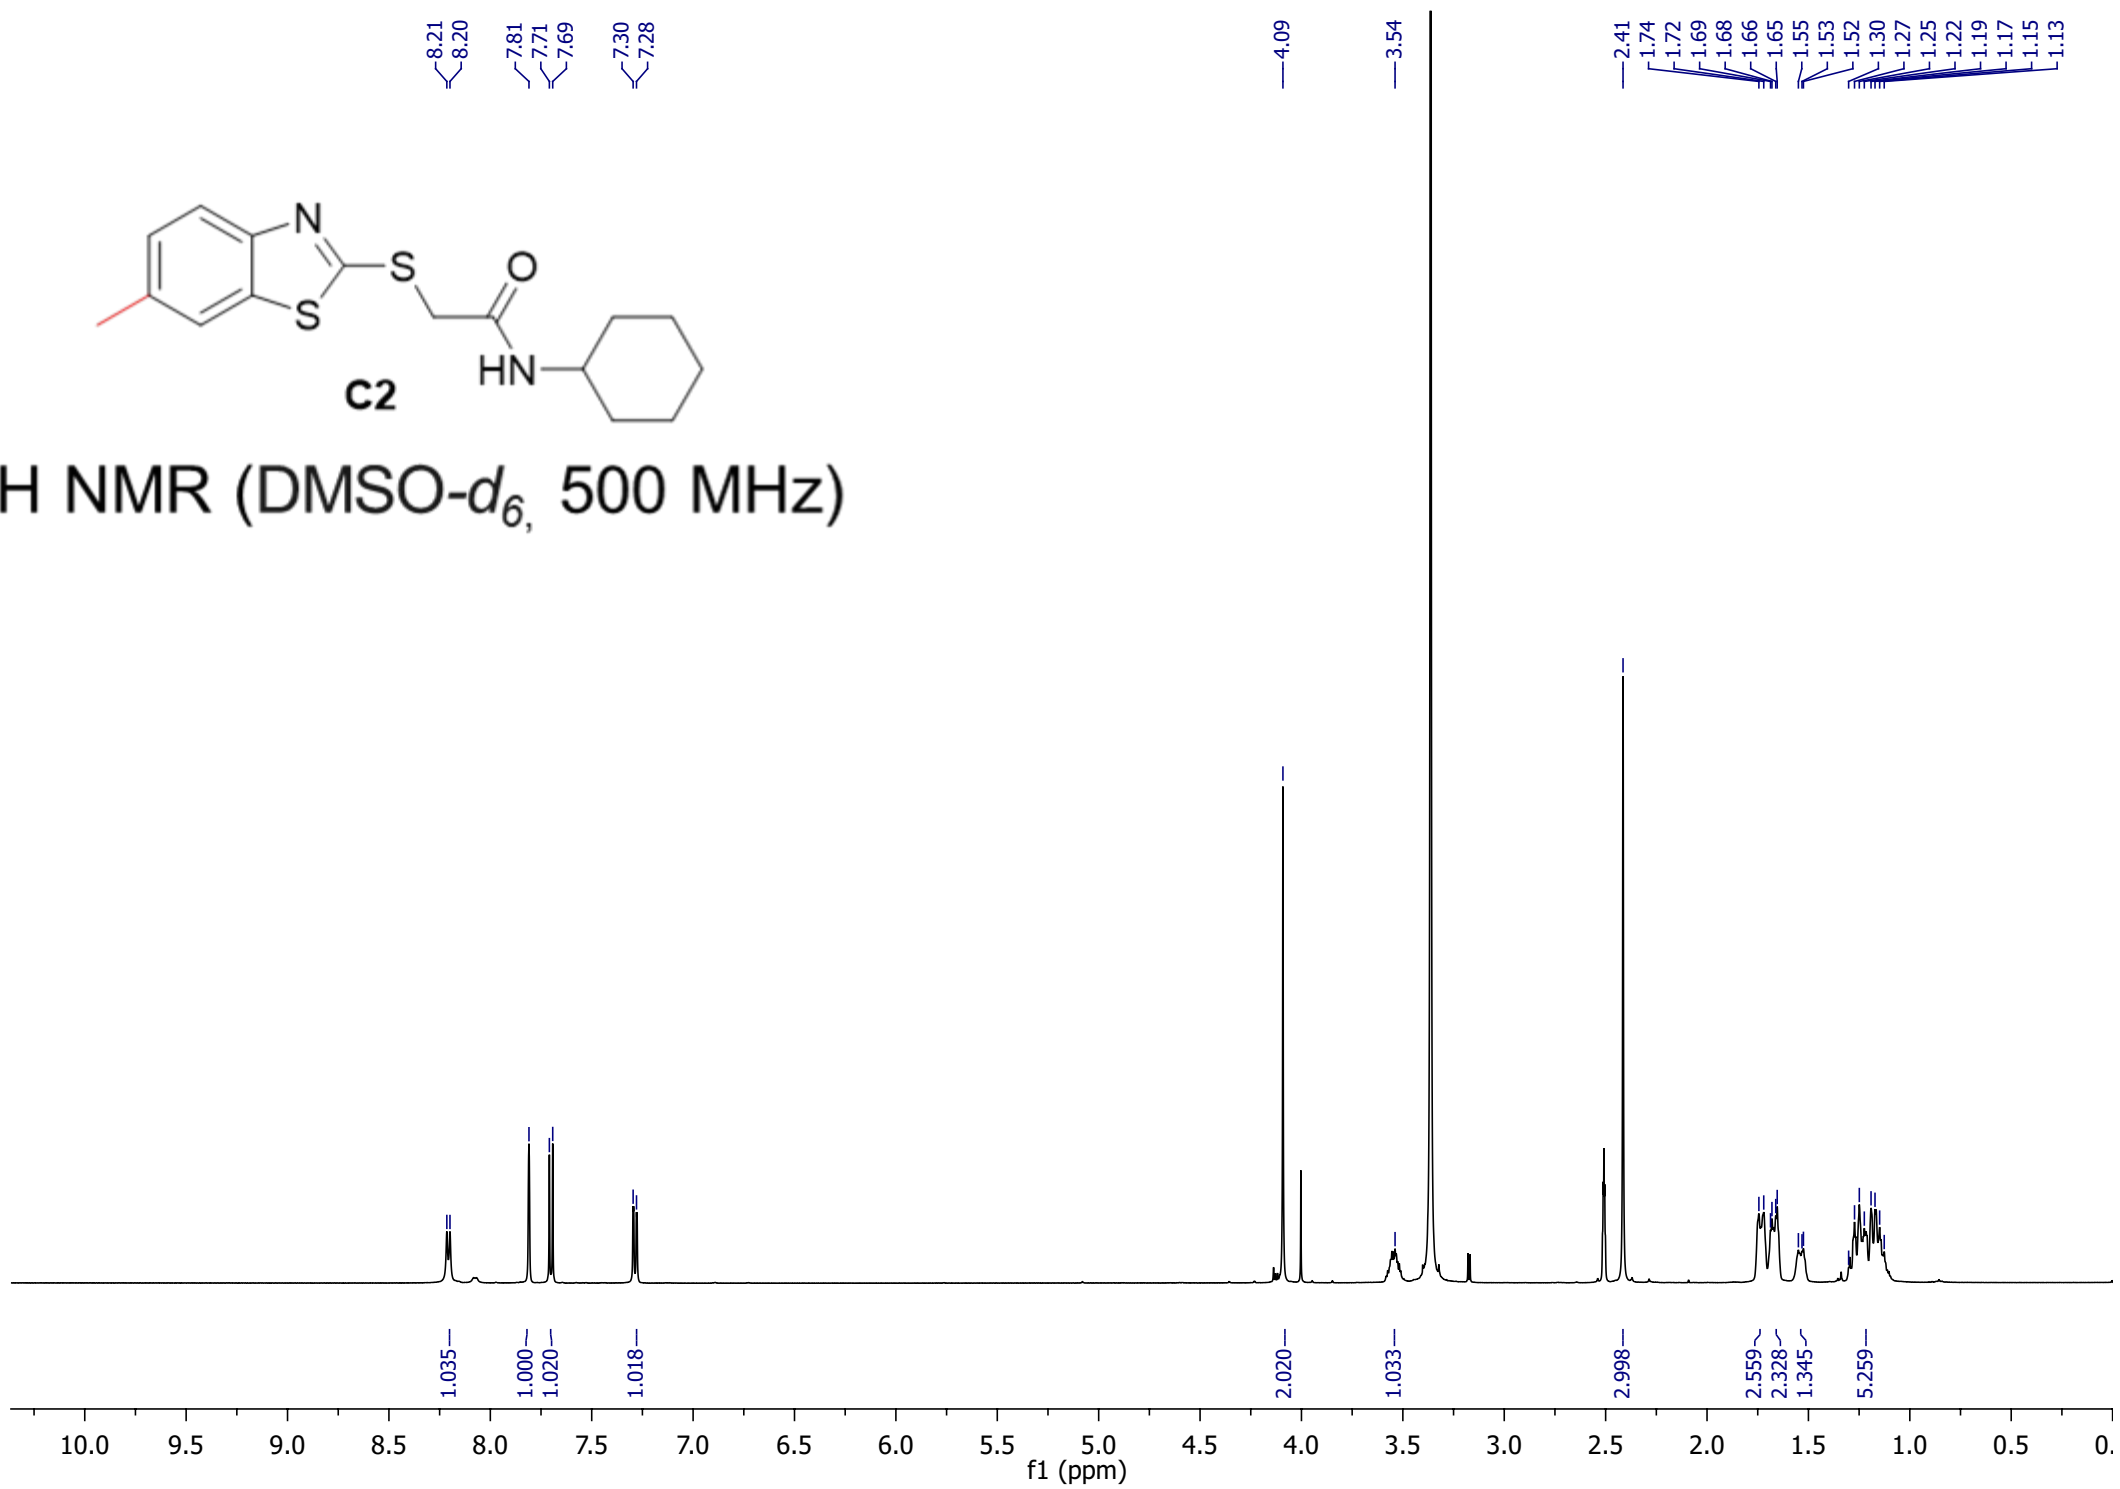



165.68  
165.36

151.19

135.33  
134.61

128.18

121.90  
121.05

48.45

37.30

32.66

25.62

24.82

21.40

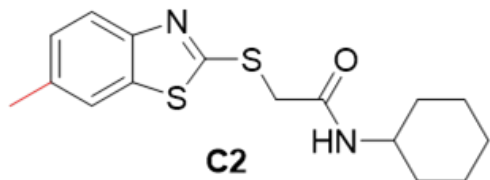

<sup>13</sup>C NMR (DMSO-d<sub>6</sub>, 125 MHz)

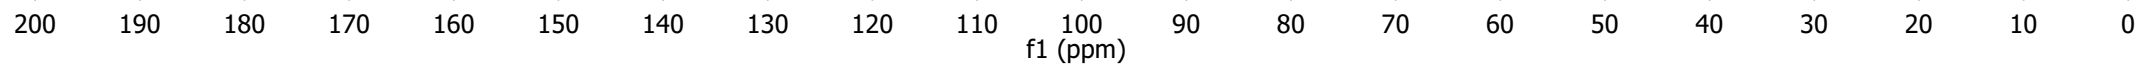

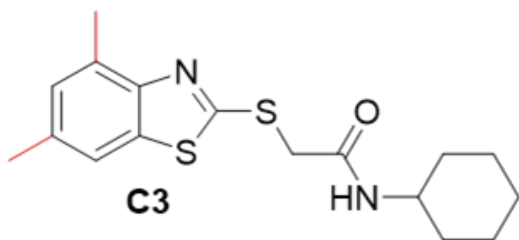

$^1\text{H NMR}$  (DMSO- $d_6$ , 500 MHz)

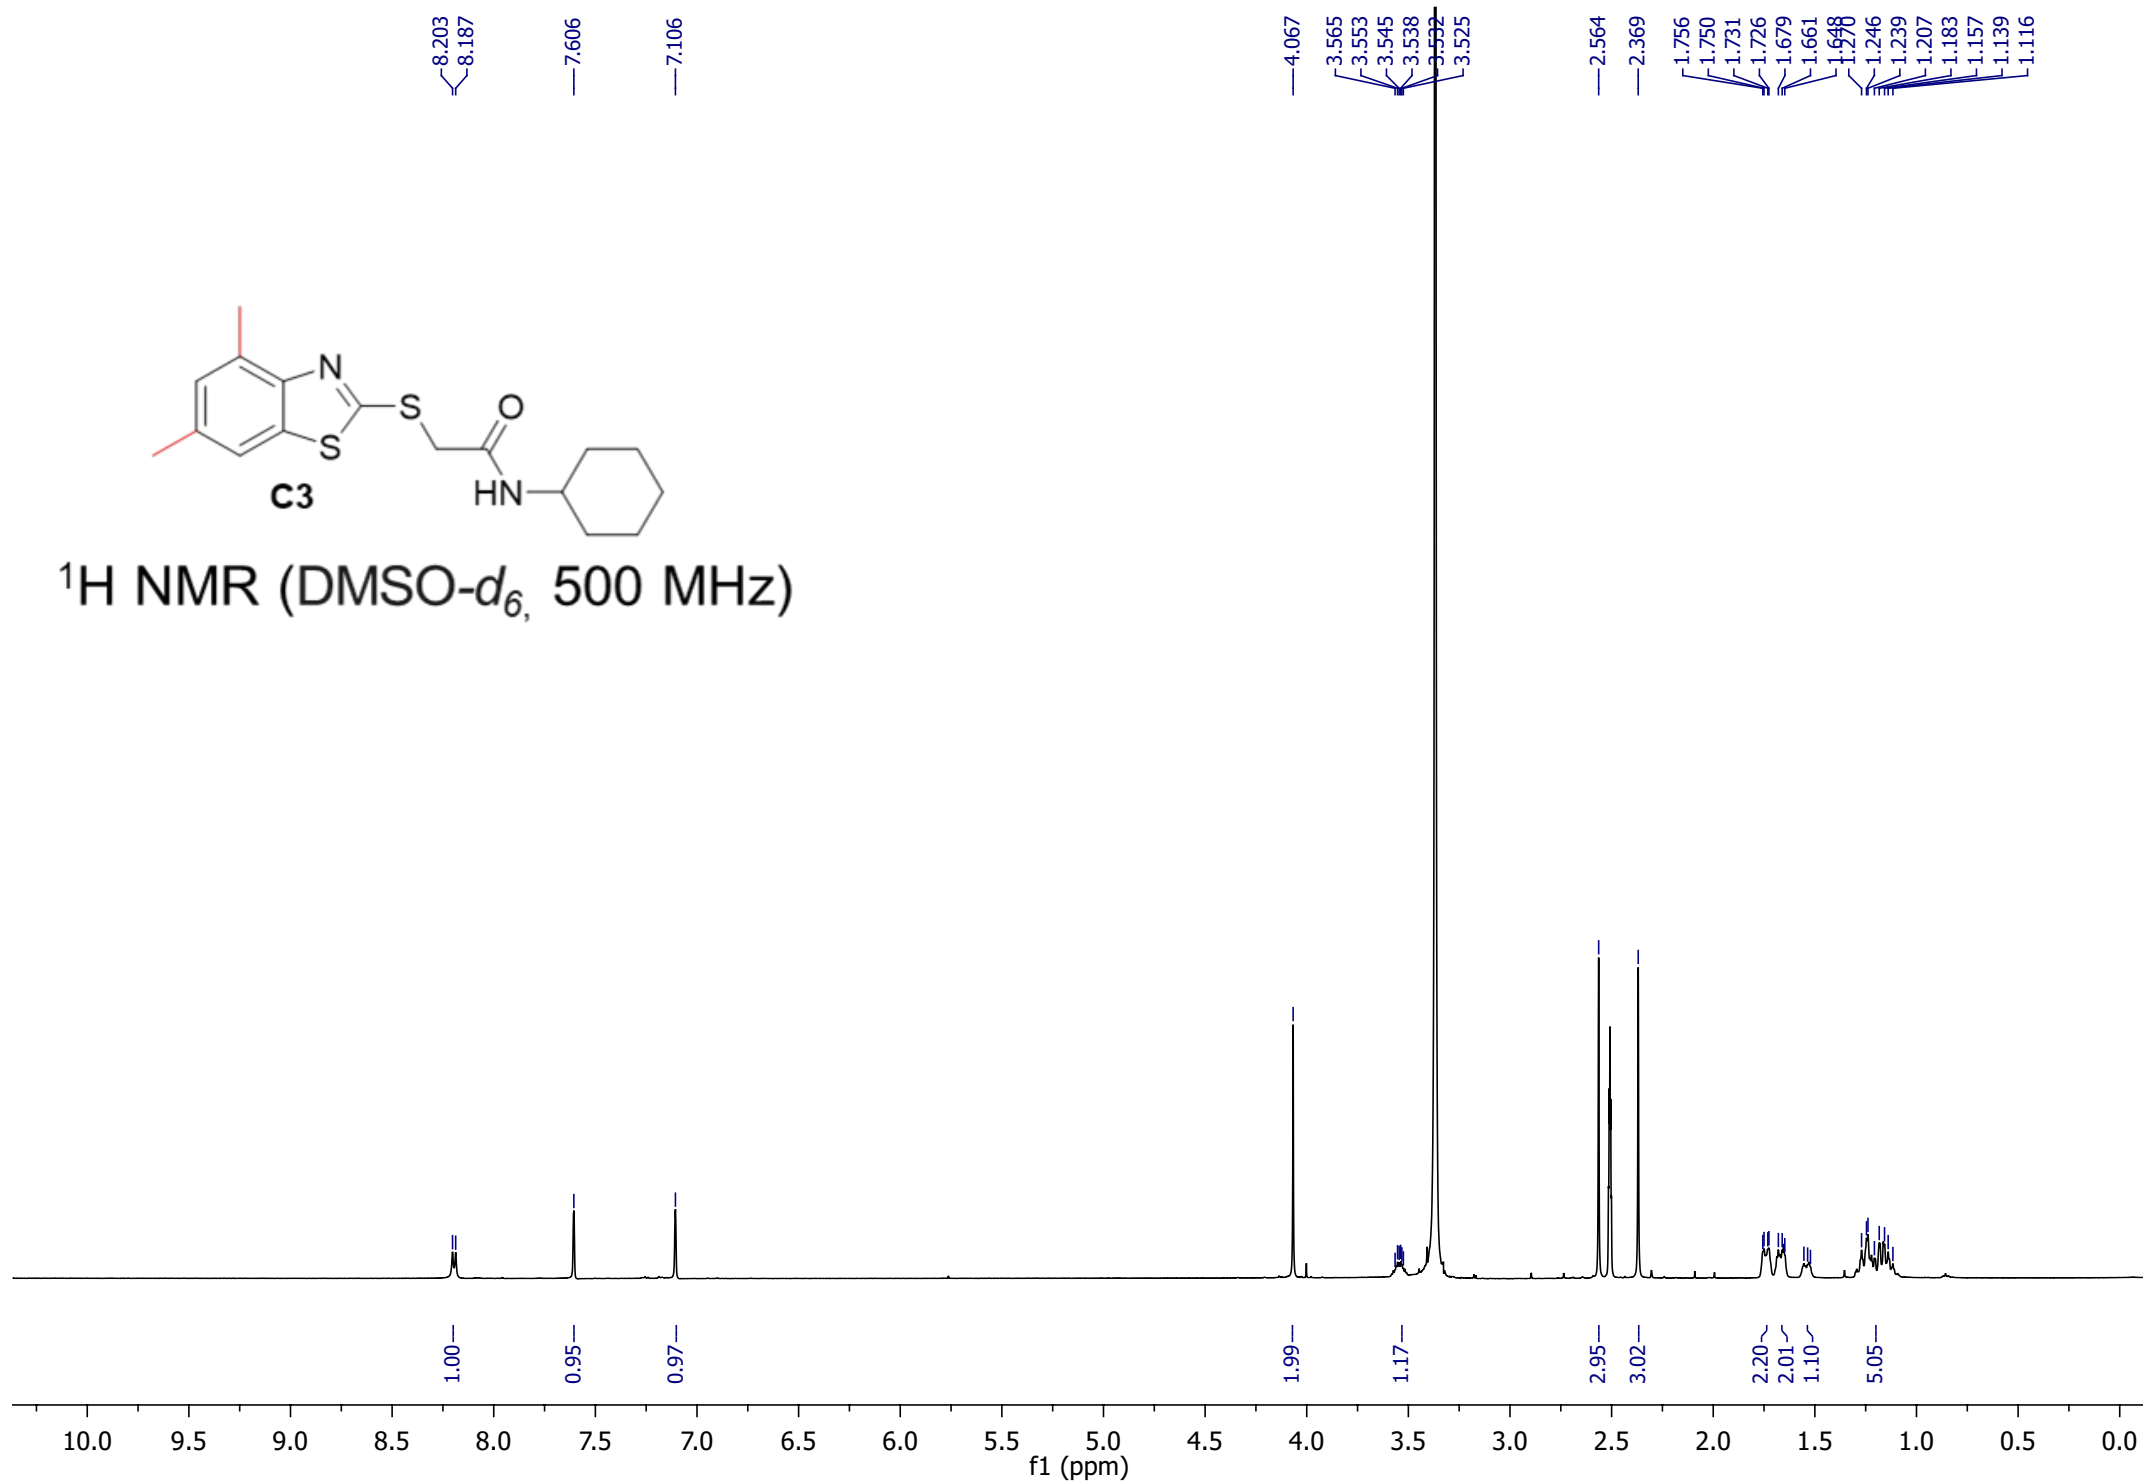

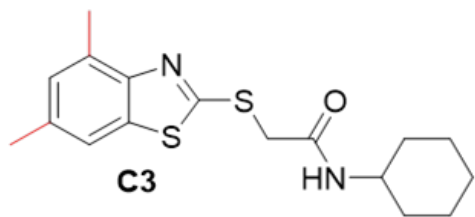

<sup>13</sup>C NMR (DMSO-*d*<sub>6</sub>, 125 MHz)

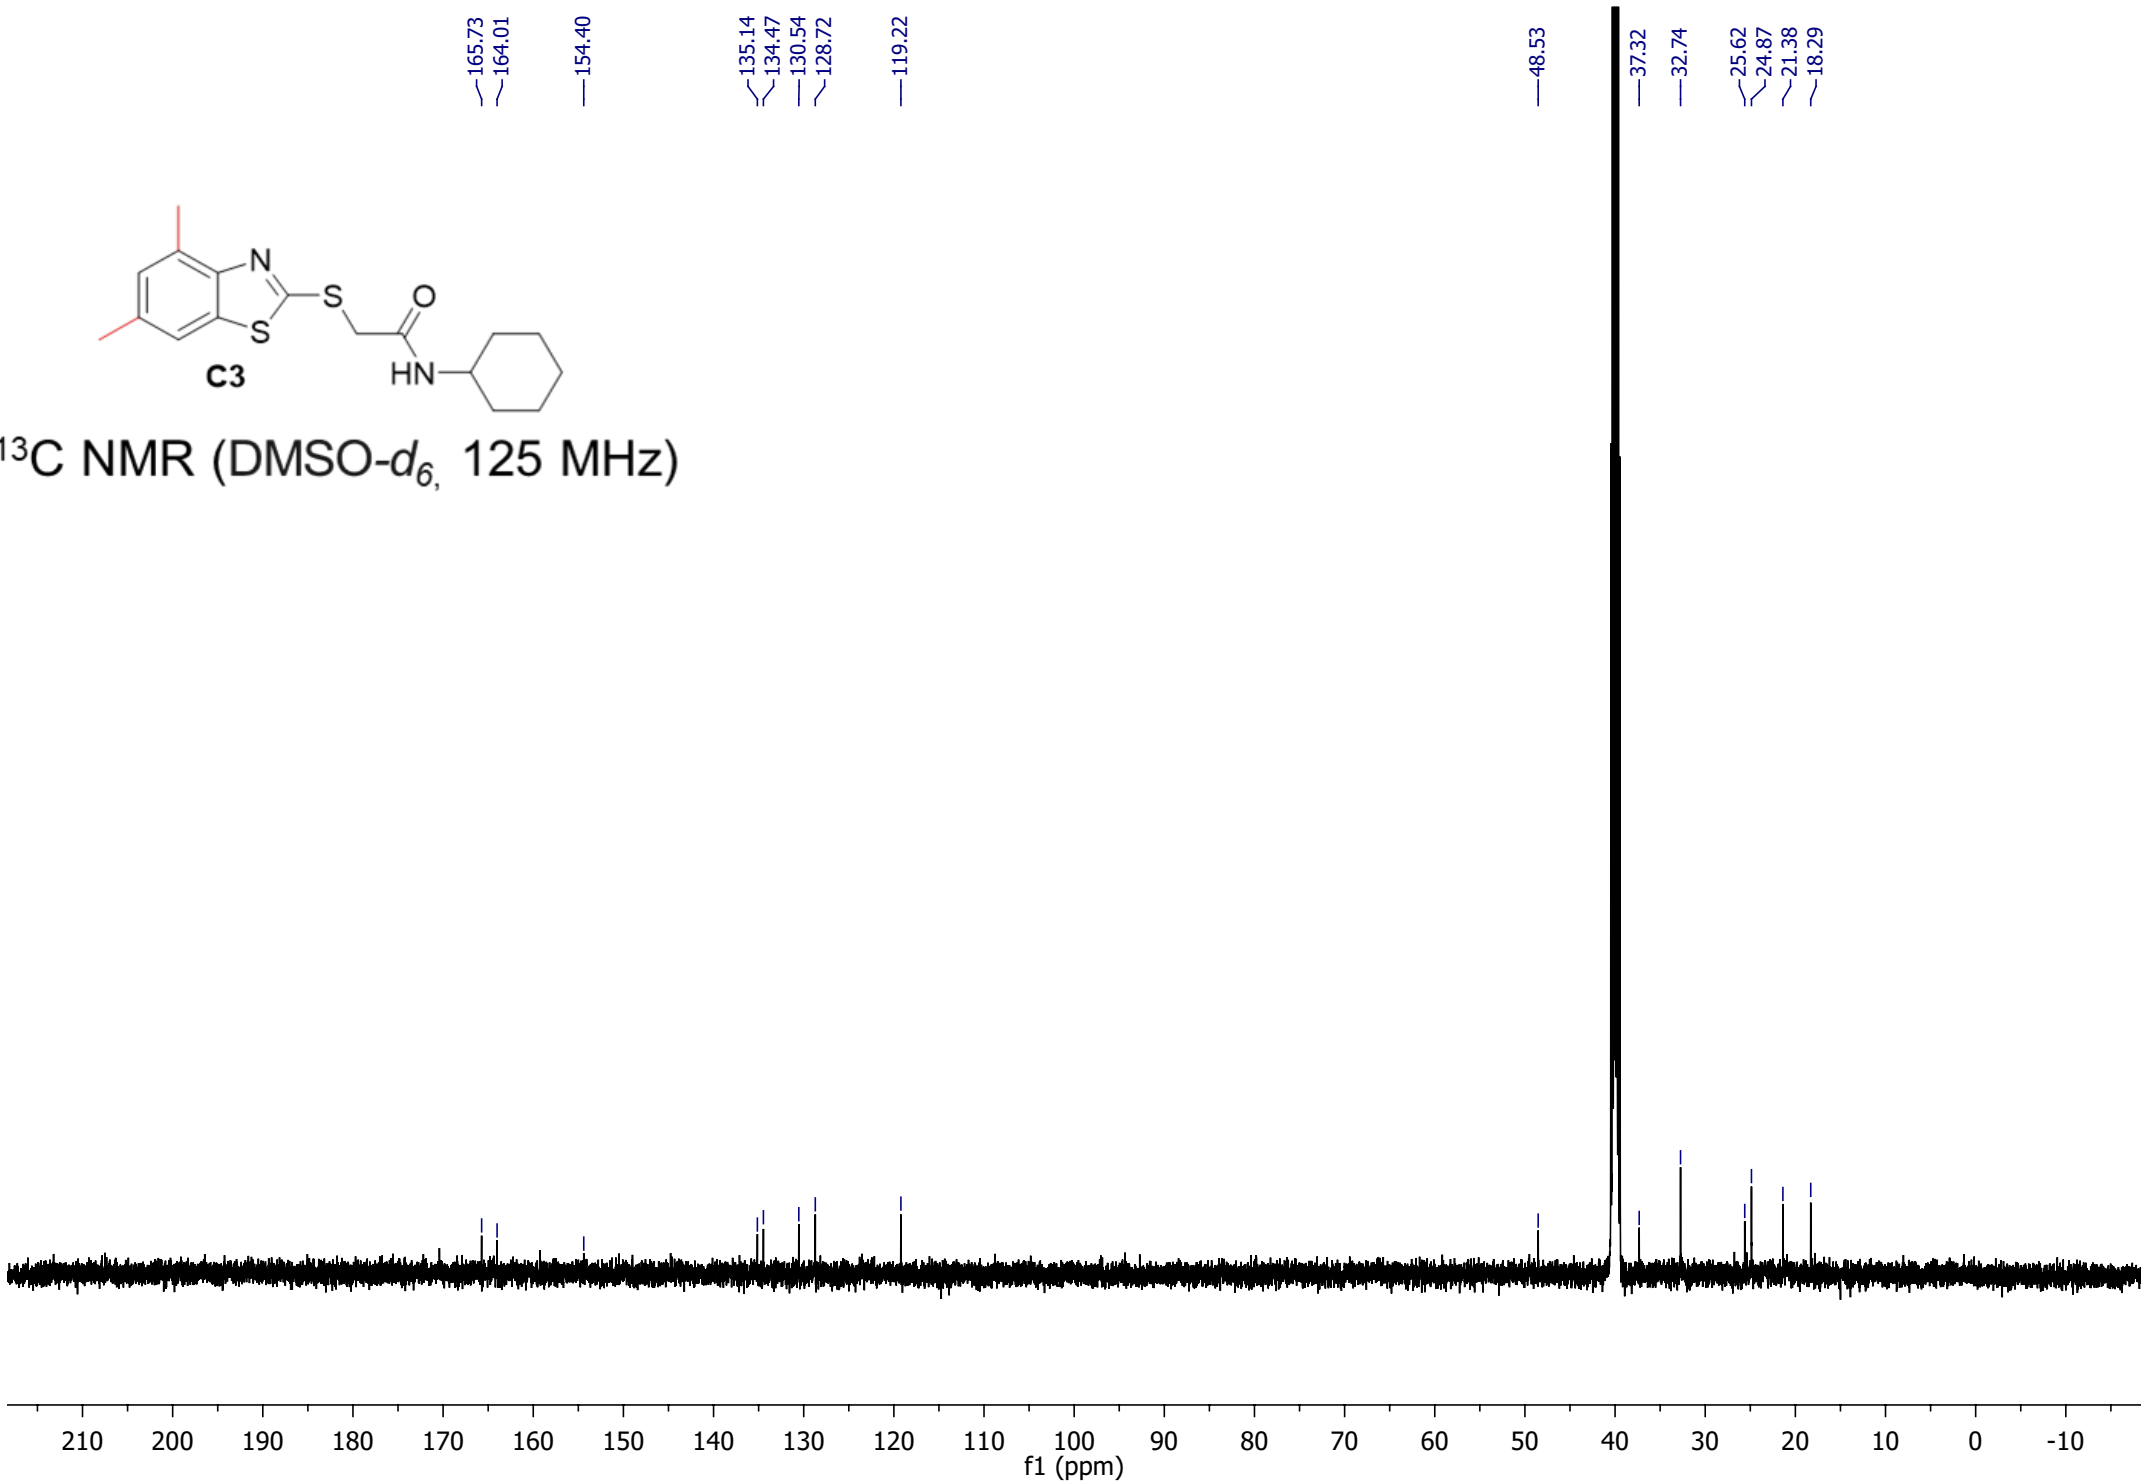

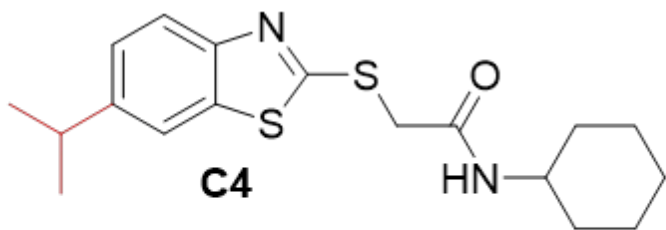

$^1\text{H}$  NMR (DMSO- $d_6$ , 500 MHz)

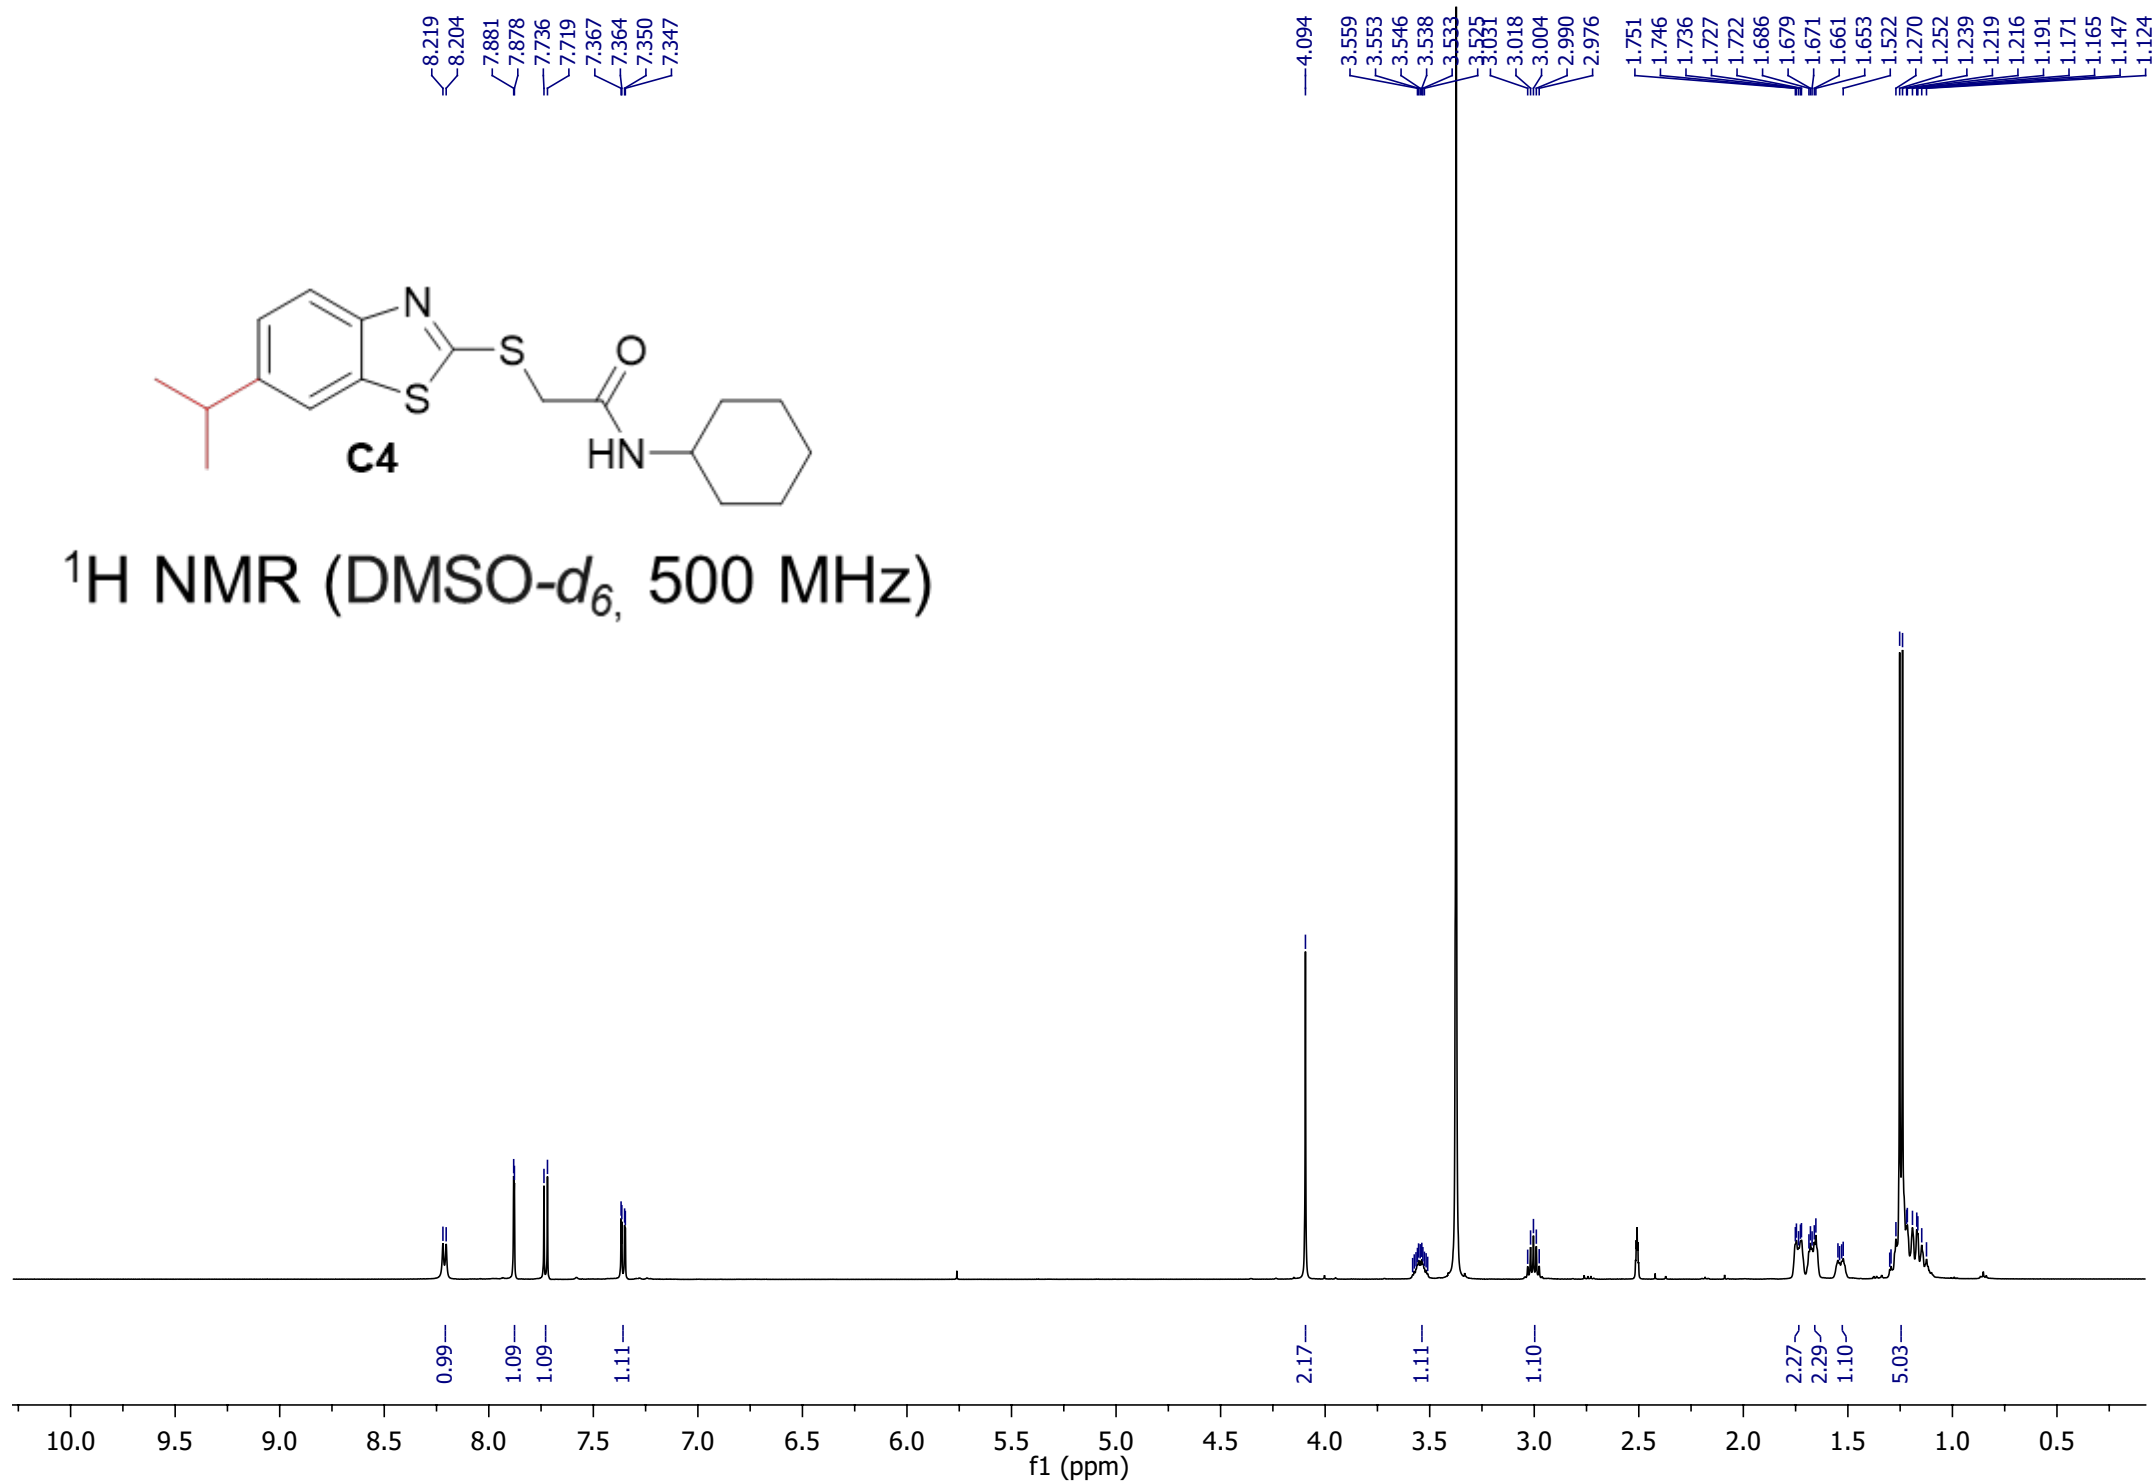

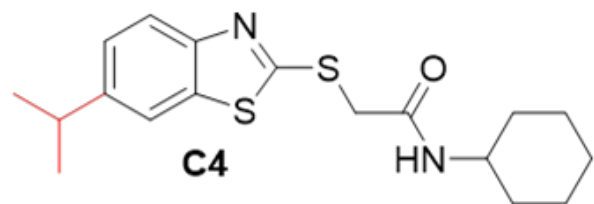

<sup>13</sup>C NMR (DMSO-*d*<sub>6</sub>, 125 MHz)

165.65  
165.57  
151.44  
145.62  
135.40  
125.73  
121.15  
119.37

48.45  
37.32  
33.91  
32.66  
25.61  
24.83  
24.50

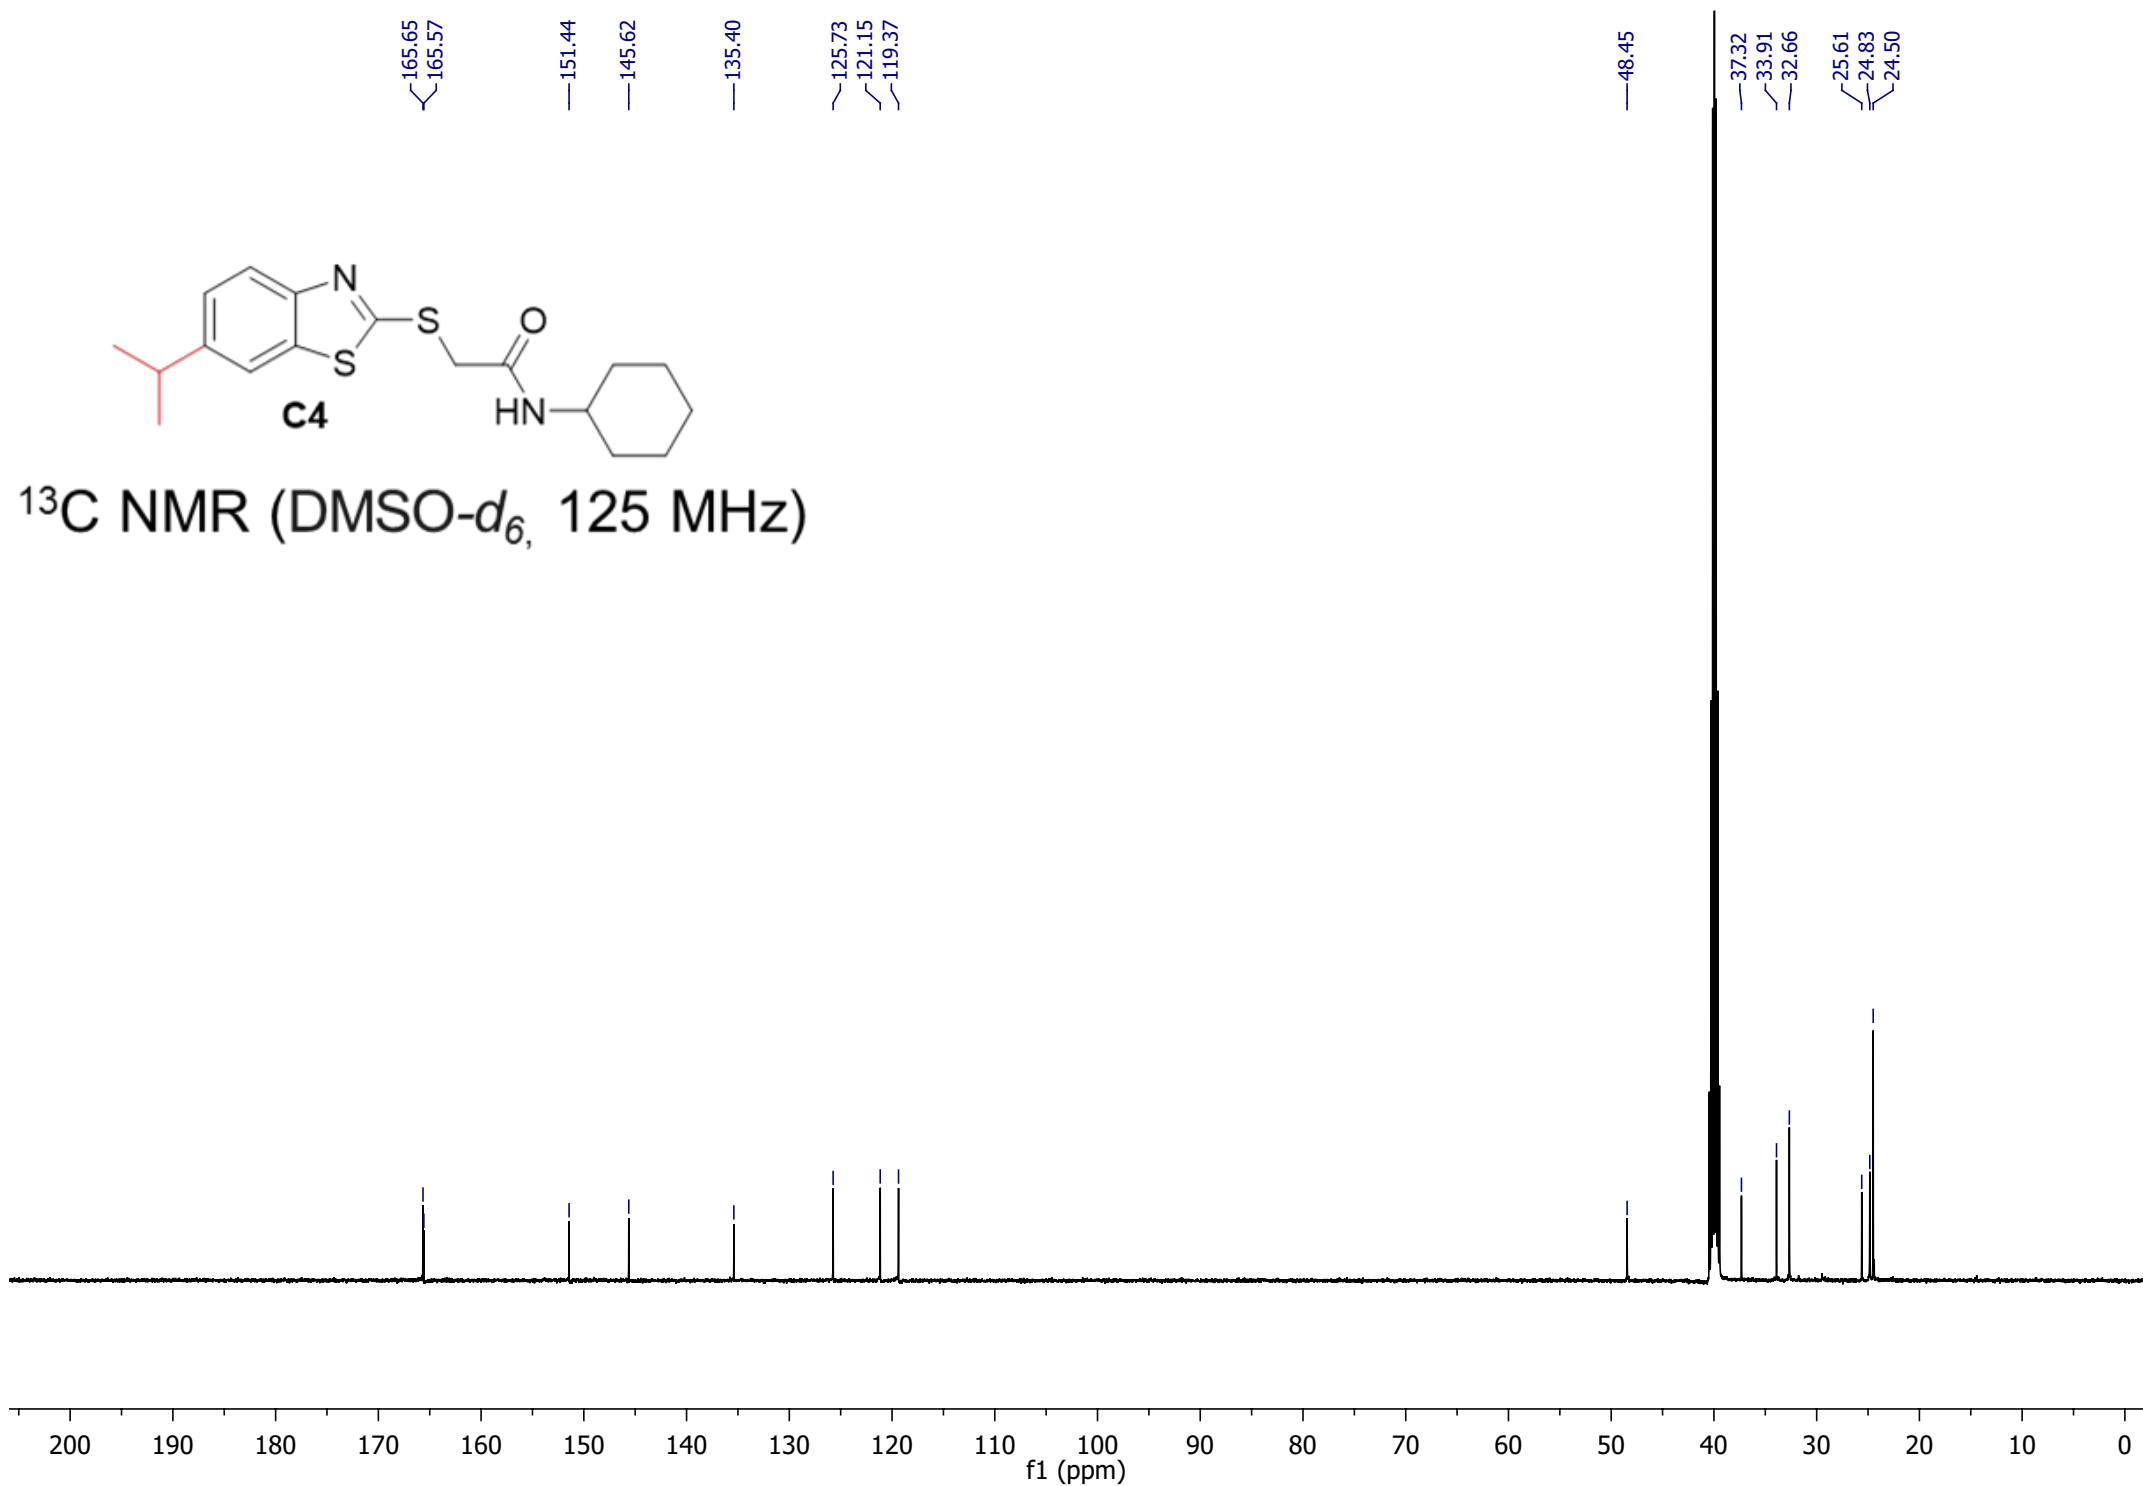

8.22  
8.21  
7.98  
7.97  
7.96  
7.95  
7.84  
7.83  
7.82  
7.81  
7.36  
7.36  
7.35  
7.34  
7.33  
7.32

4.11

3.57  
3.55  
3.53  
3.51

1.75  
1.75  
1.73  
1.72  
1.69  
1.68  
1.67  
1.66  
1.65  
1.55  
1.54  
1.54  
1.53  
1.27  
1.25  
1.24  
1.23  
1.22  
1.19  
1.17  
1.15  
1.13

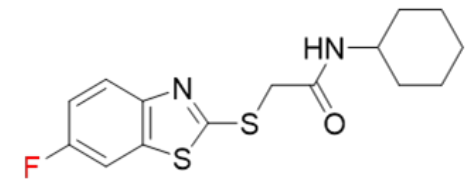

C5

<sup>1</sup>H NMR (DMSO-d<sub>6</sub>, 500 MHz)

1.00

1.10

1.12

1.24

2.08

1.26

2.39

2.37

1.30

5.32

10.0 9.5 9.0 8.5 8.0 7.5 7.0 6.5 6.0 5.5 5.0 4.5 4.0 3.5 3.0 2.5 2.0 1.5 1.0 0.5 0.0

f1 (ppm)

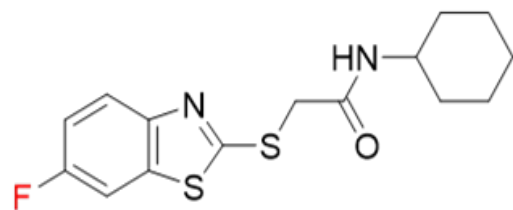

C5

$^{13}\text{C}$  NMR (DMSO- $d_6$ , 125 MHz)

—165.58

—149.94

—136.53  
—136.50

—122.55  
—122.48

—115.16  
—114.97

—109.08  
—108.86

—48.48

—37.37

—32.66

—25.61  
—24.83

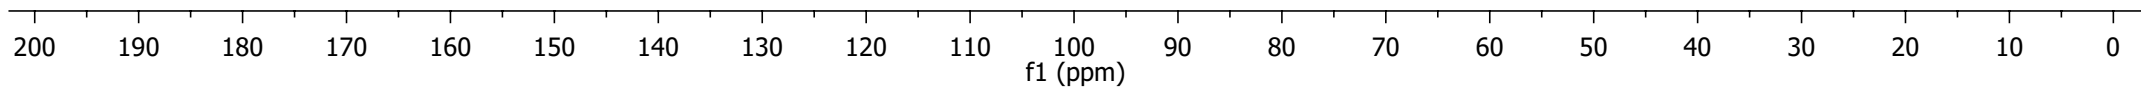

117.18  
117.19  
117.20  
117.21  
117.22  
117.23

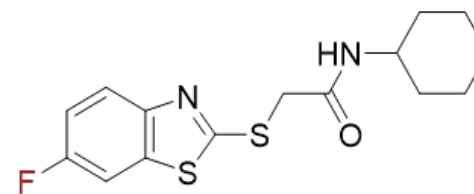

C5

$^{19}\text{F}$  NMR (DMSO- $d_6$ , 471 MHz)

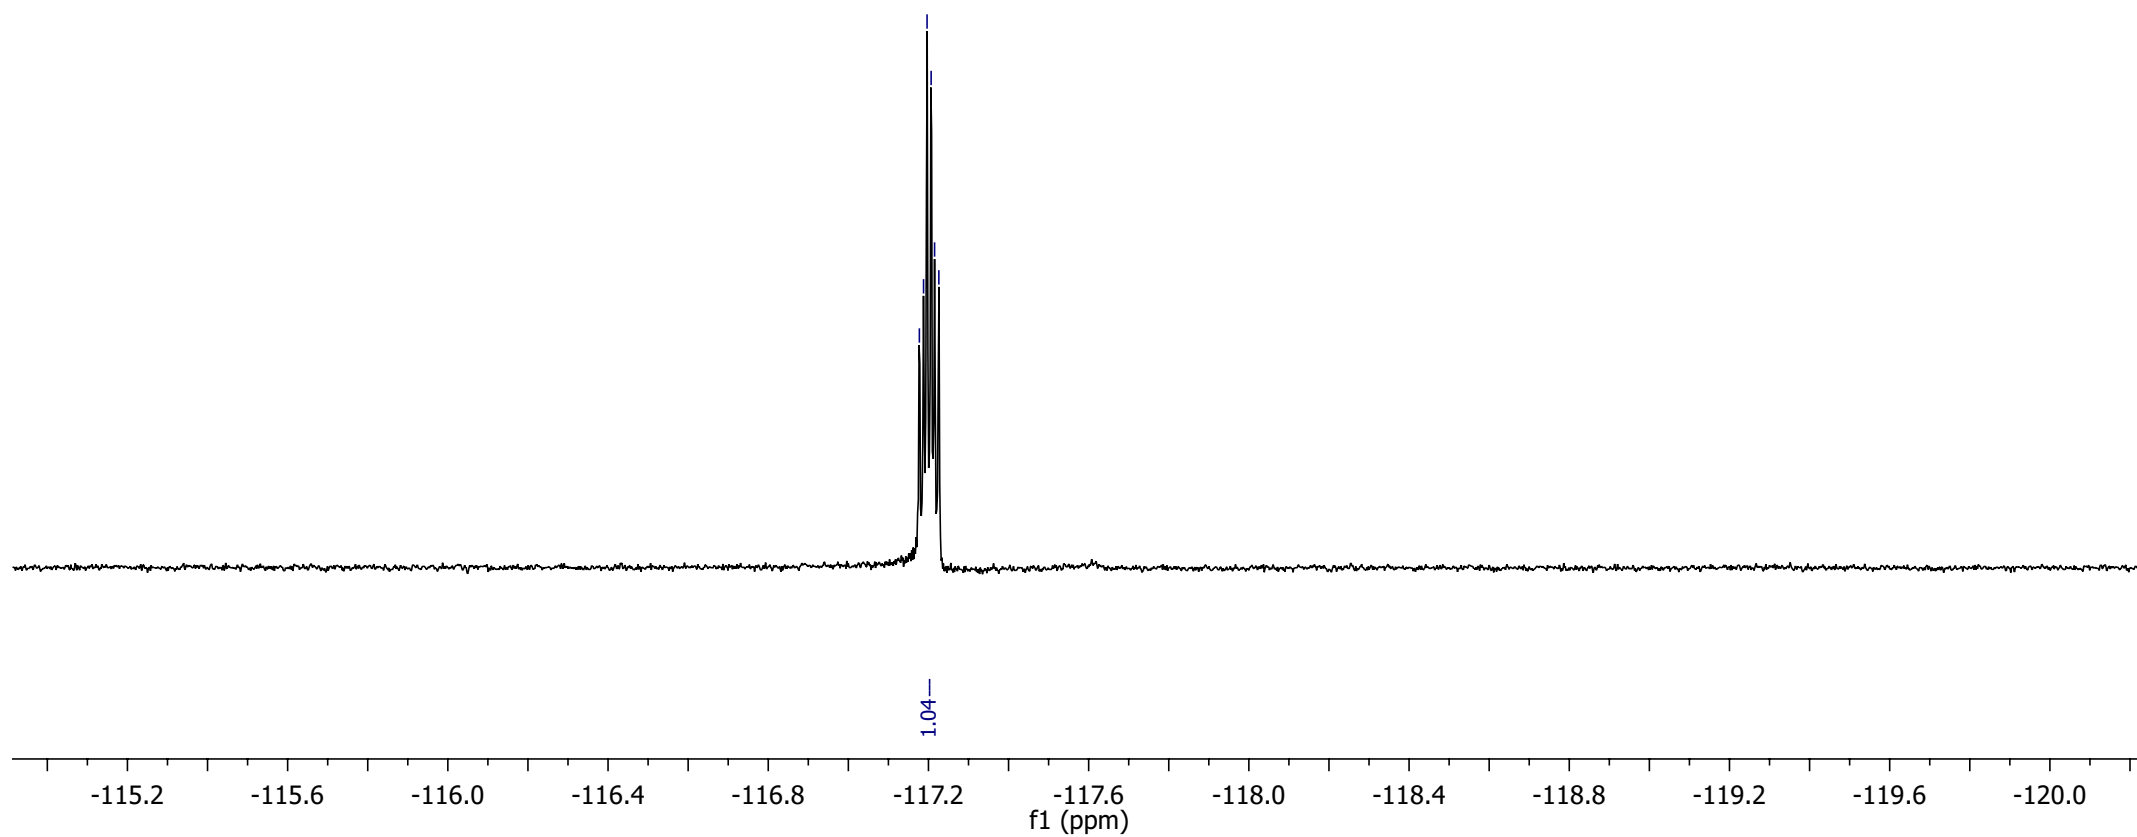



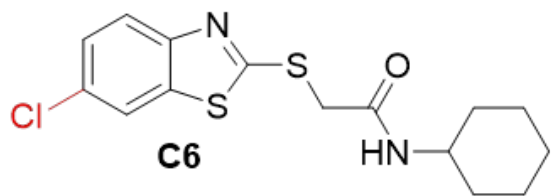

$^1\text{H}$  NMR (DMSO- $d_6$ , 500 MHz)

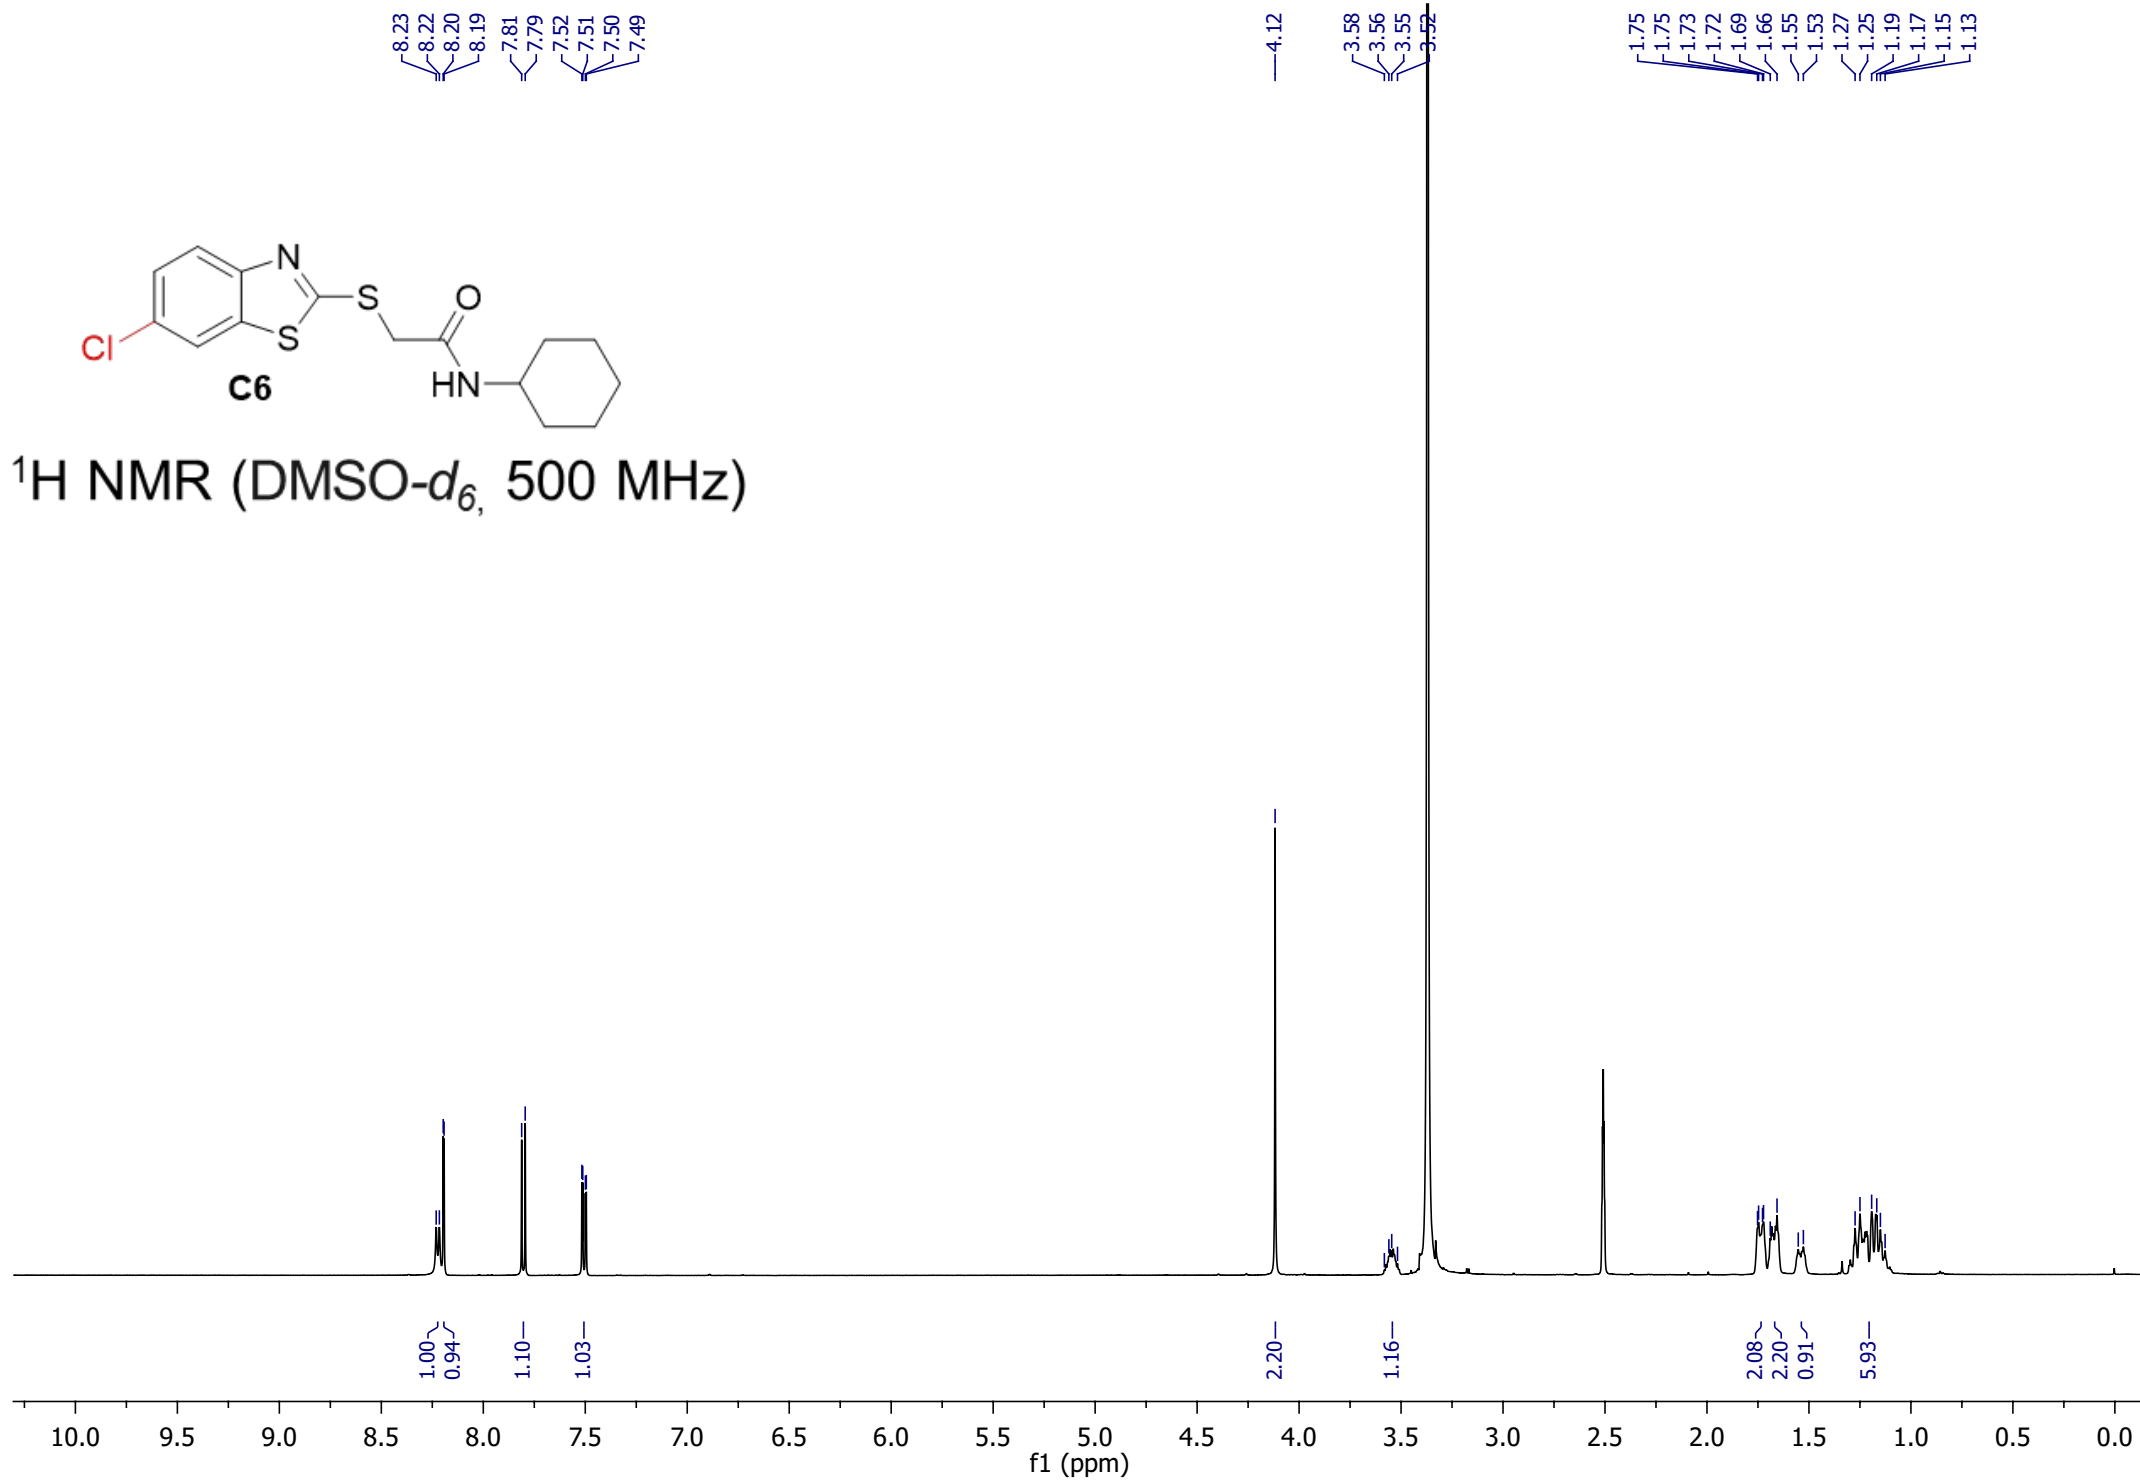

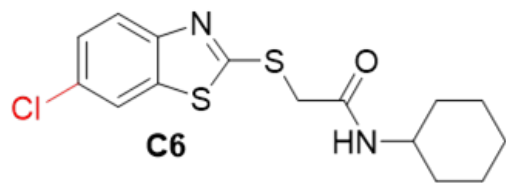

<sup>13</sup>C NMR (DMSO-*d*<sub>6</sub>, 125 MHz)

—168.24  
—165.52  
—151.86  
—136.77  
—129.33  
—127.28  
—122.50  
—122.04

—48.50  
—37.38  
—32.66  
—25.61  
—24.83

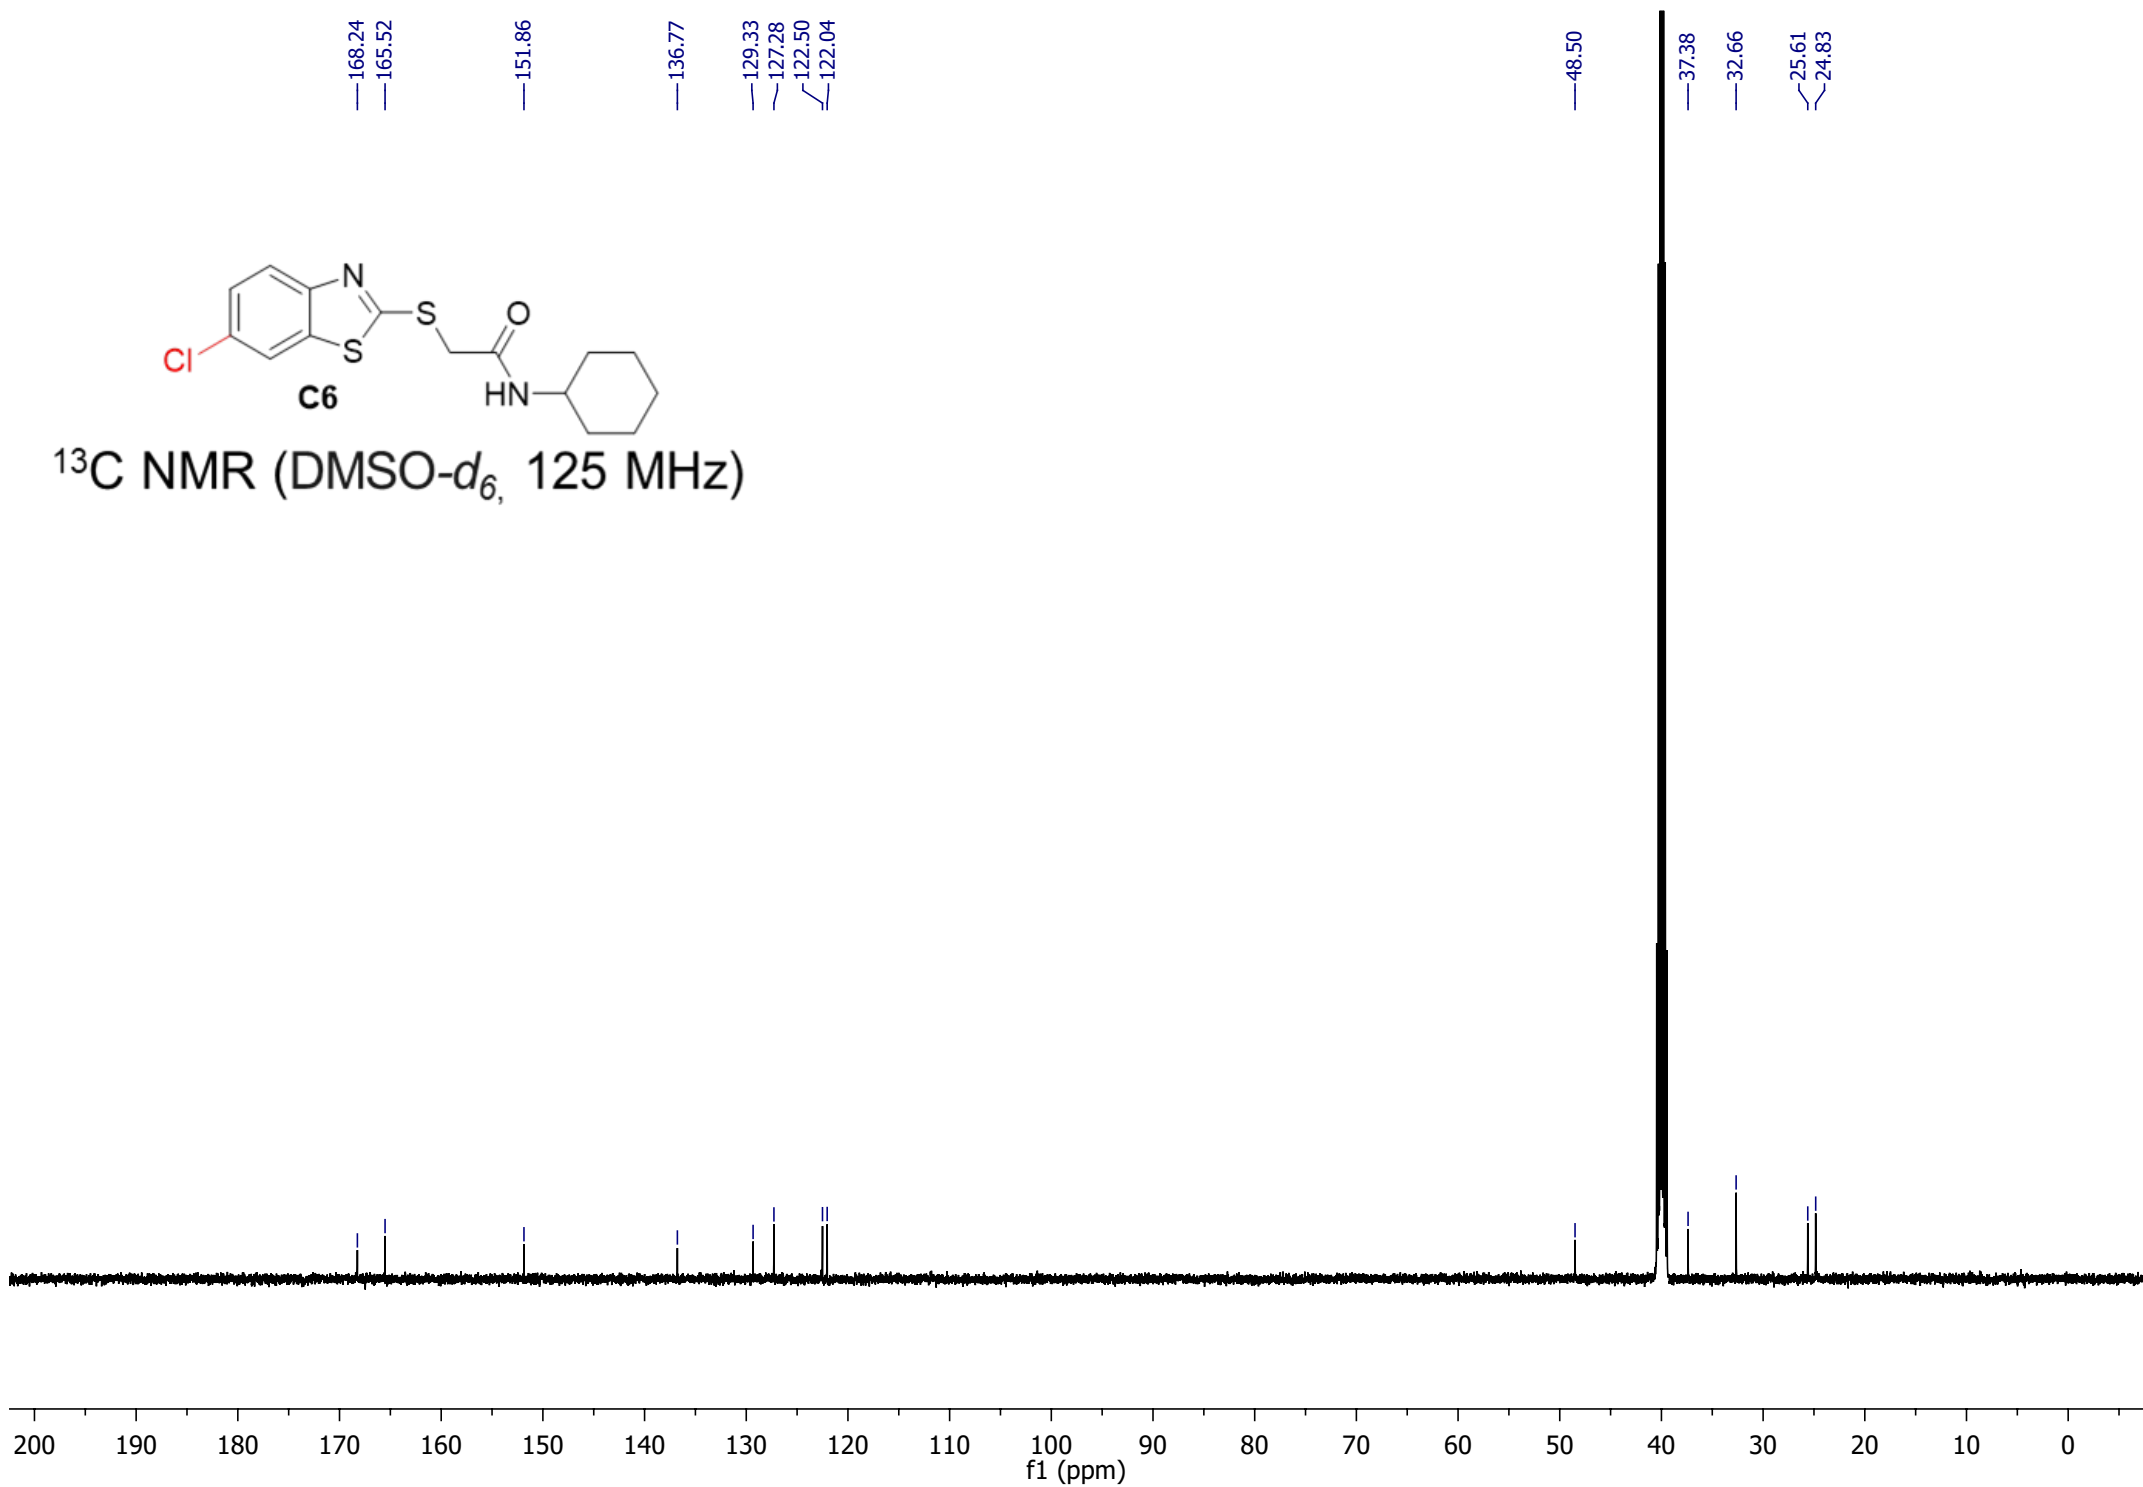

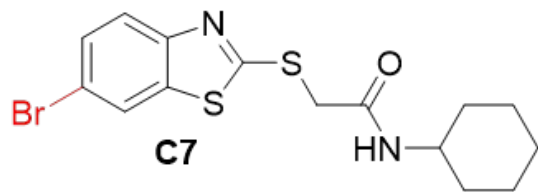

$^1\text{H}$  NMR (DMSO- $d_6$ , 500 MHz)

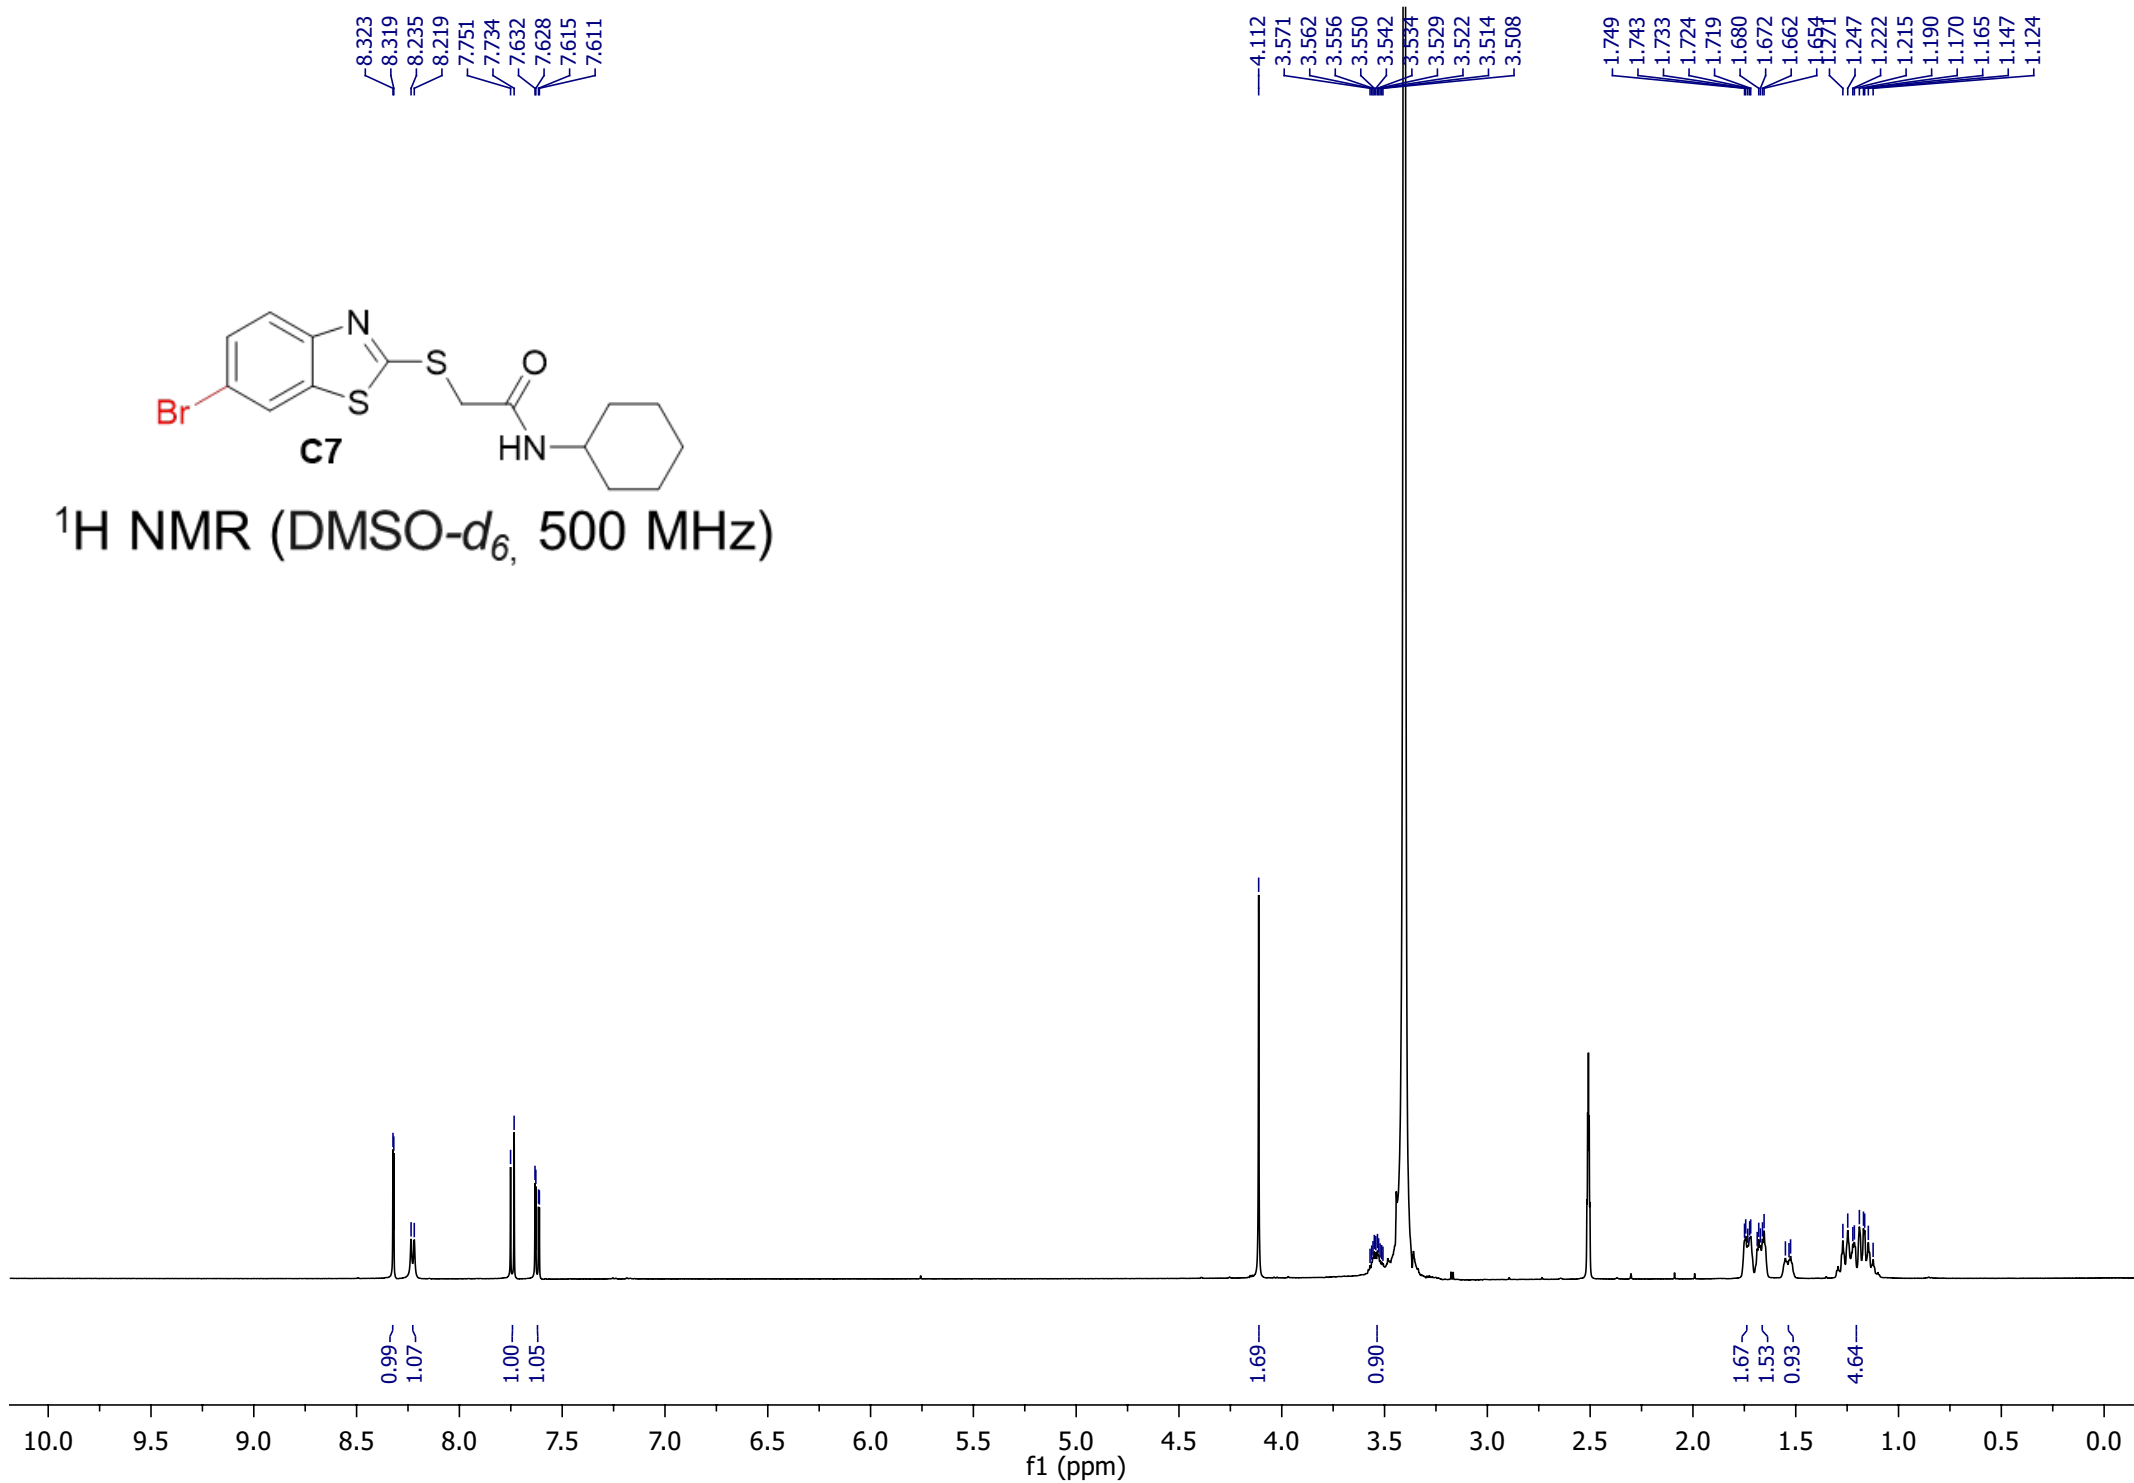

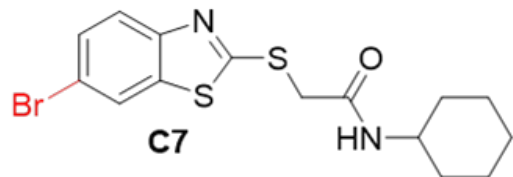

<sup>13</sup>C NMR (DMSO-*d*<sub>6</sub>, 125 MHz)

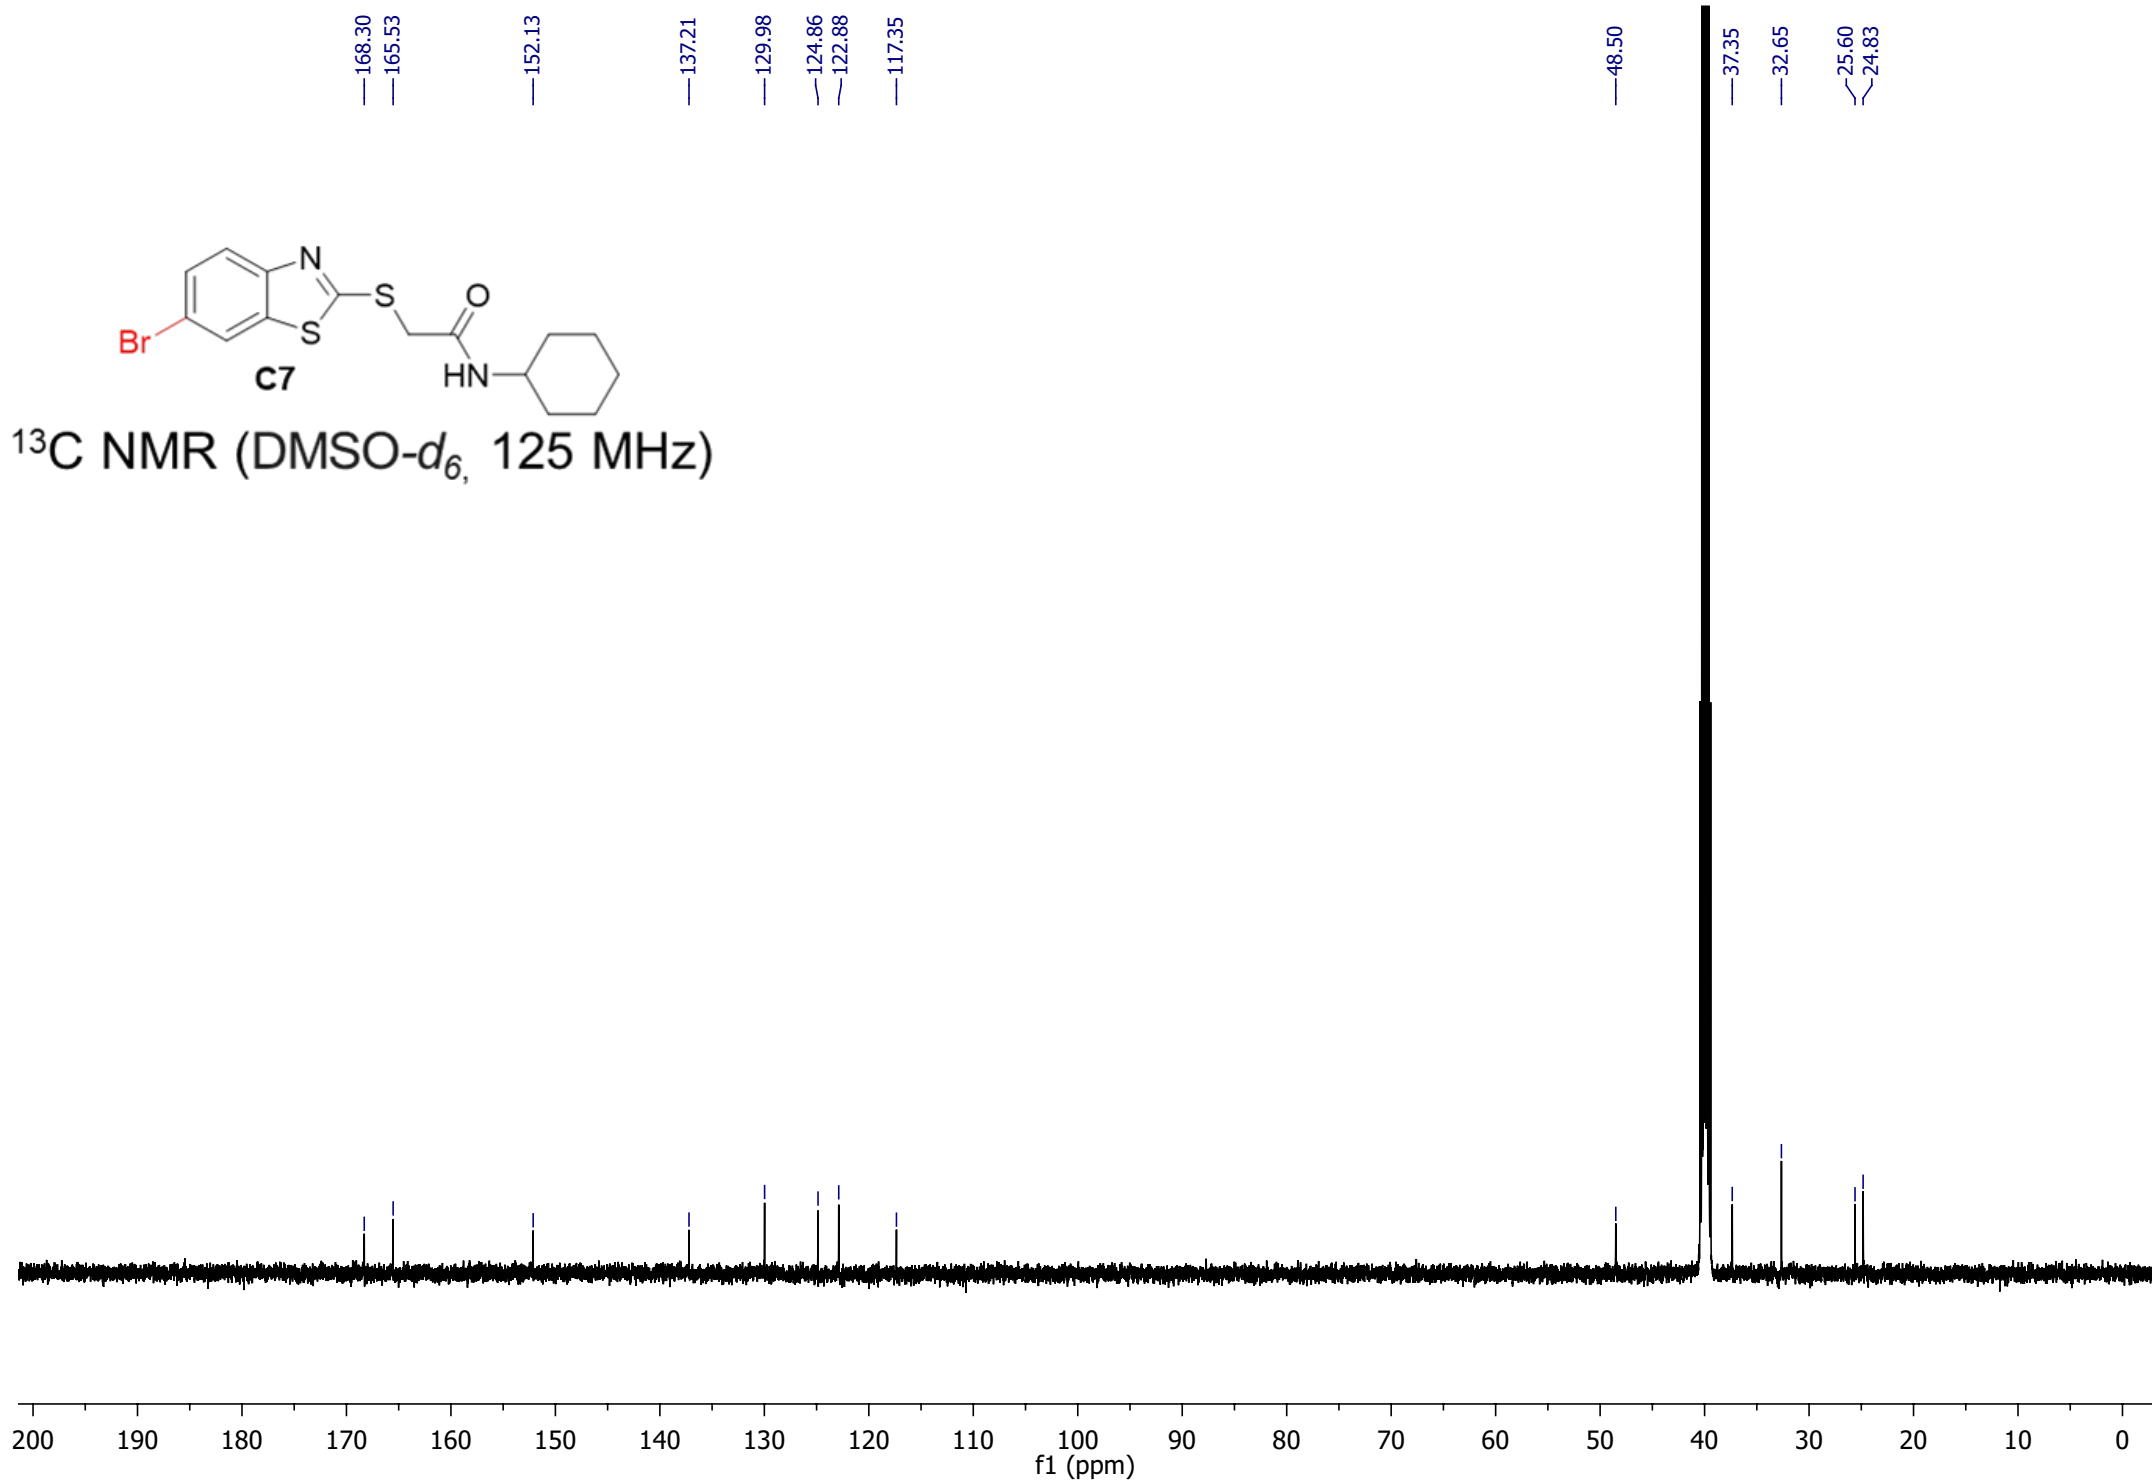

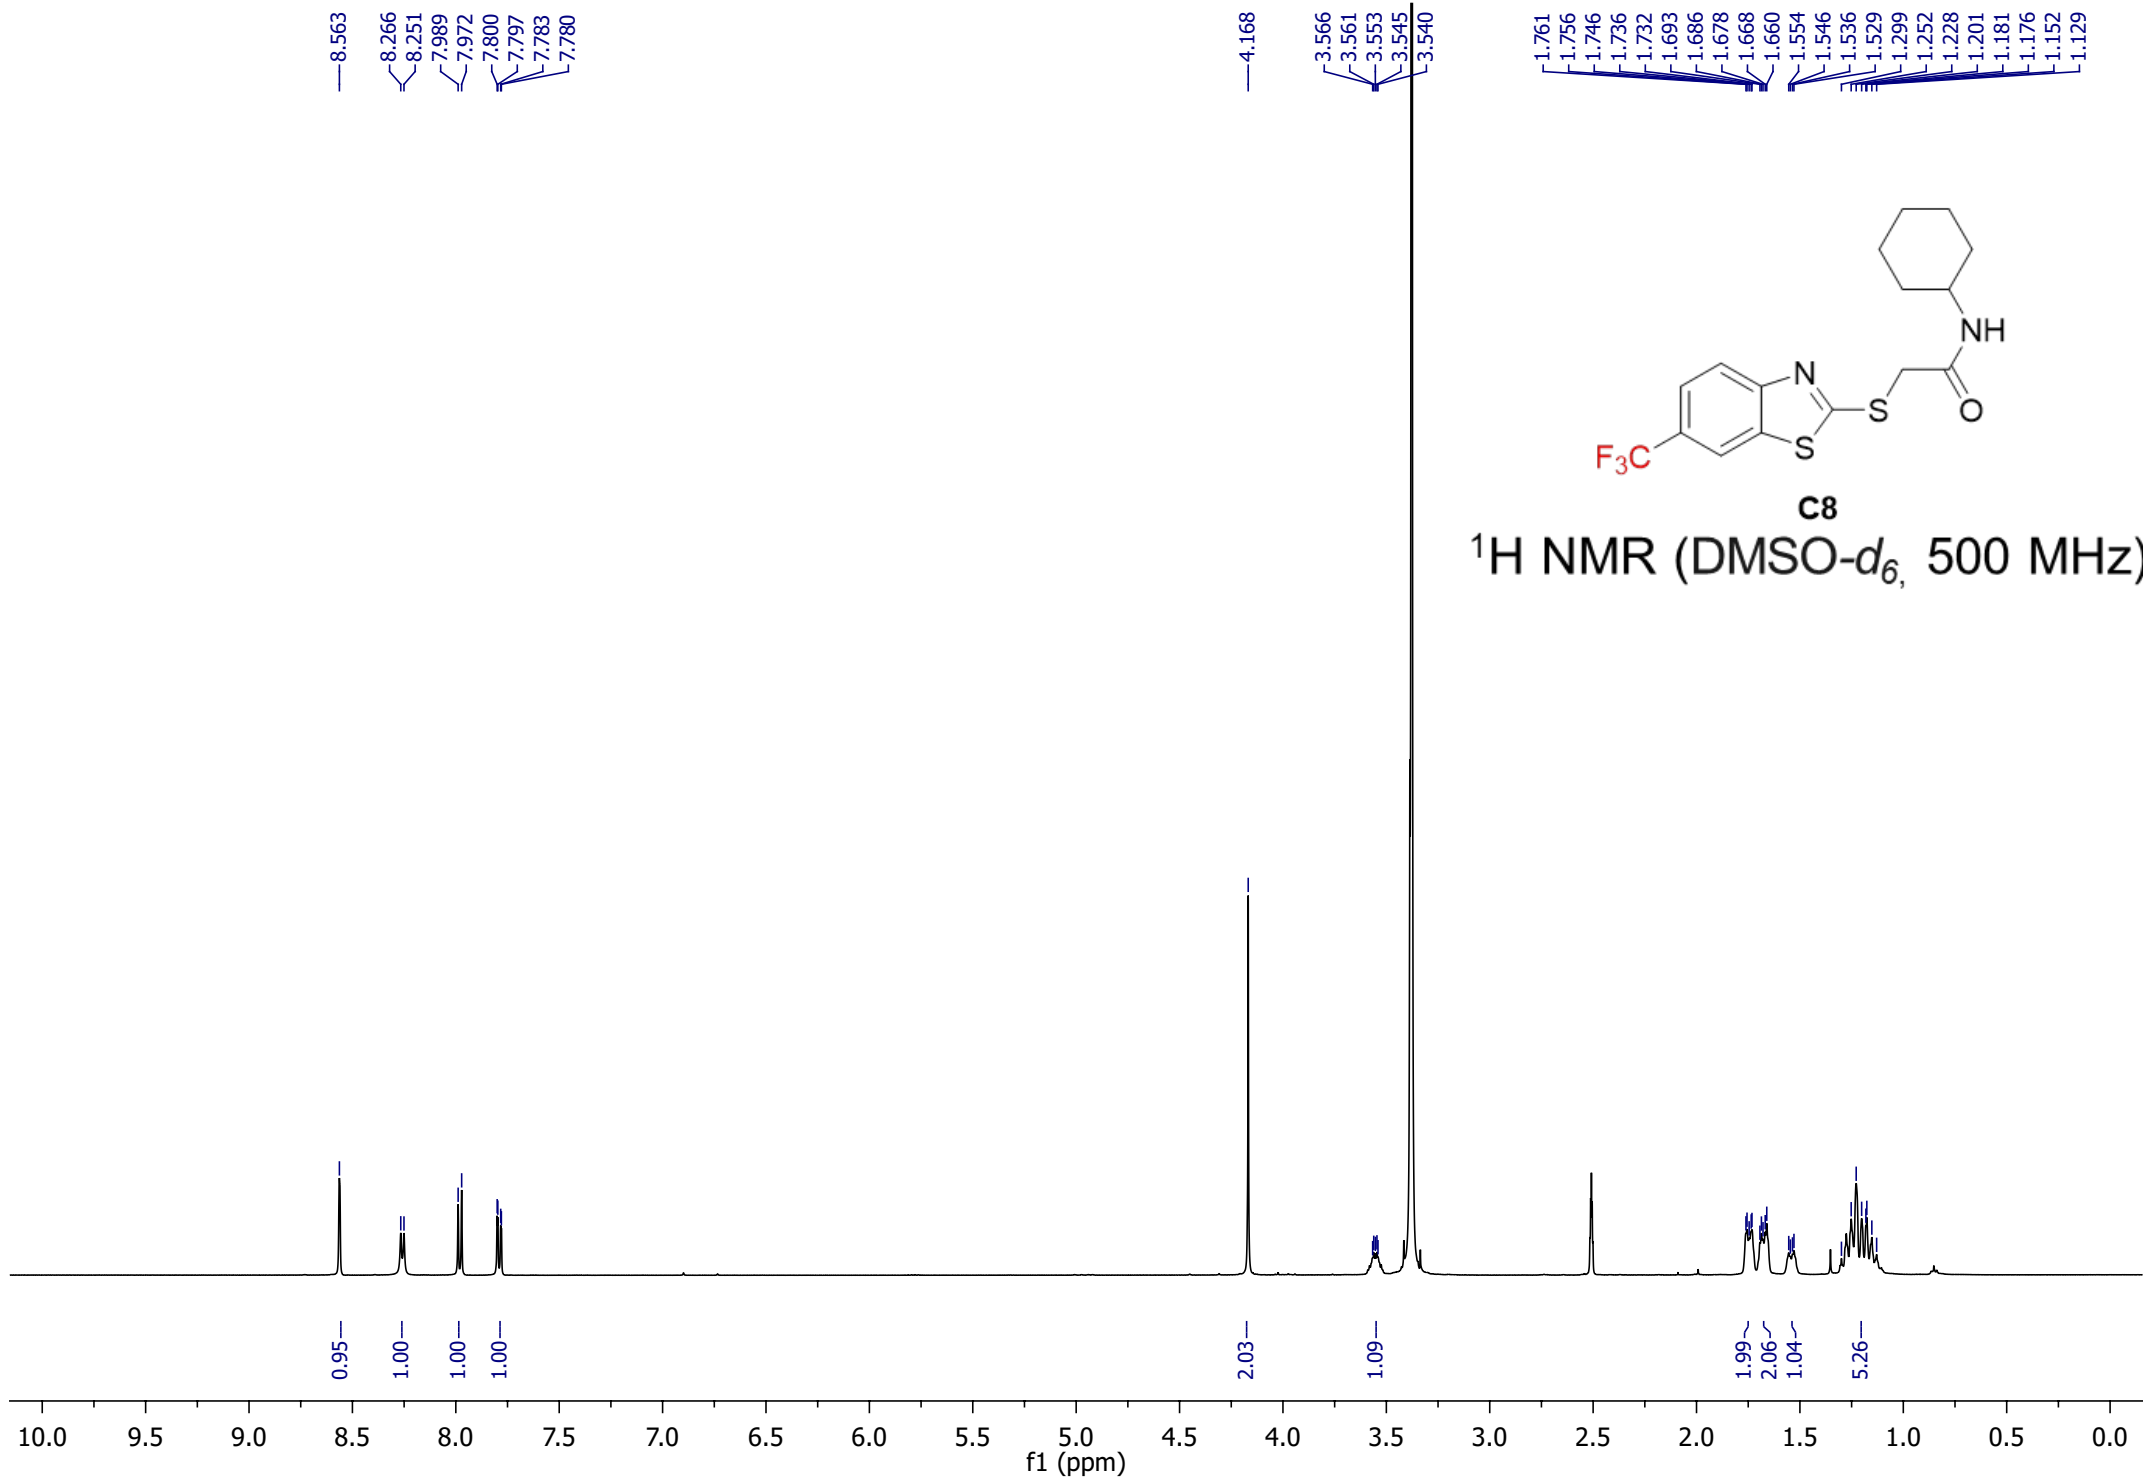

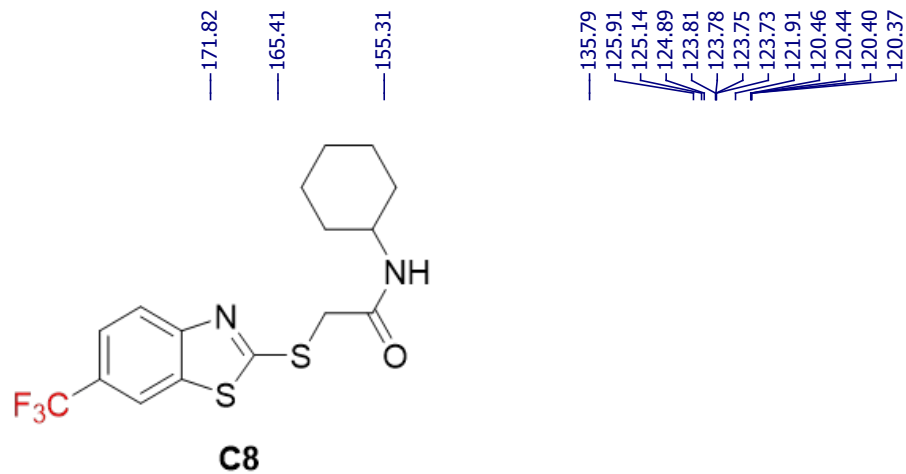

**13C NMR (DMSO-d<sub>6</sub>, 125 MHz)**

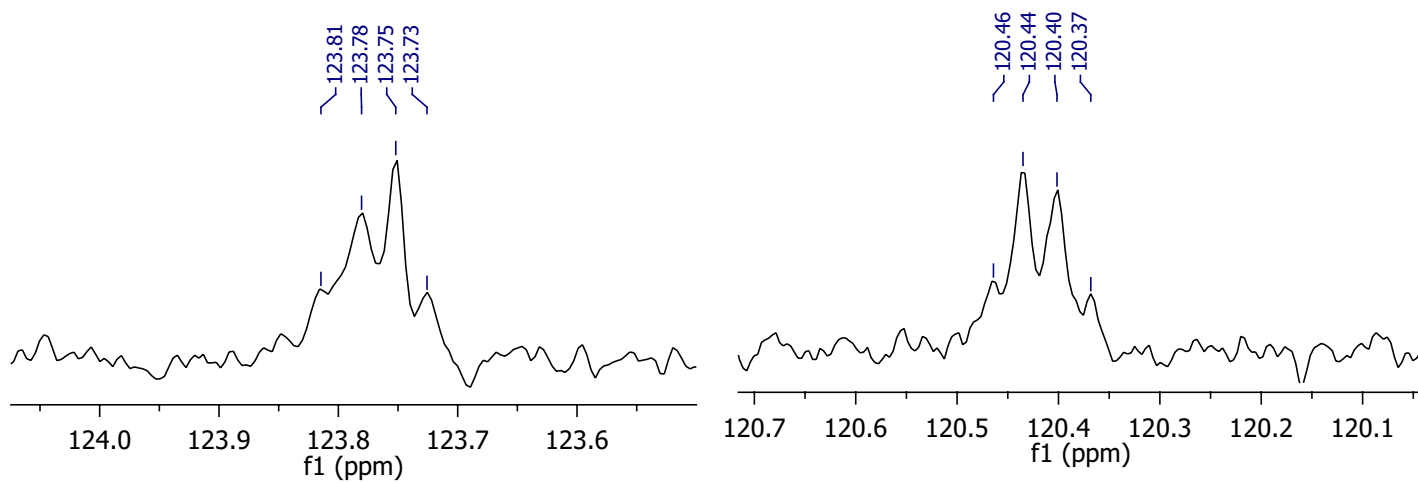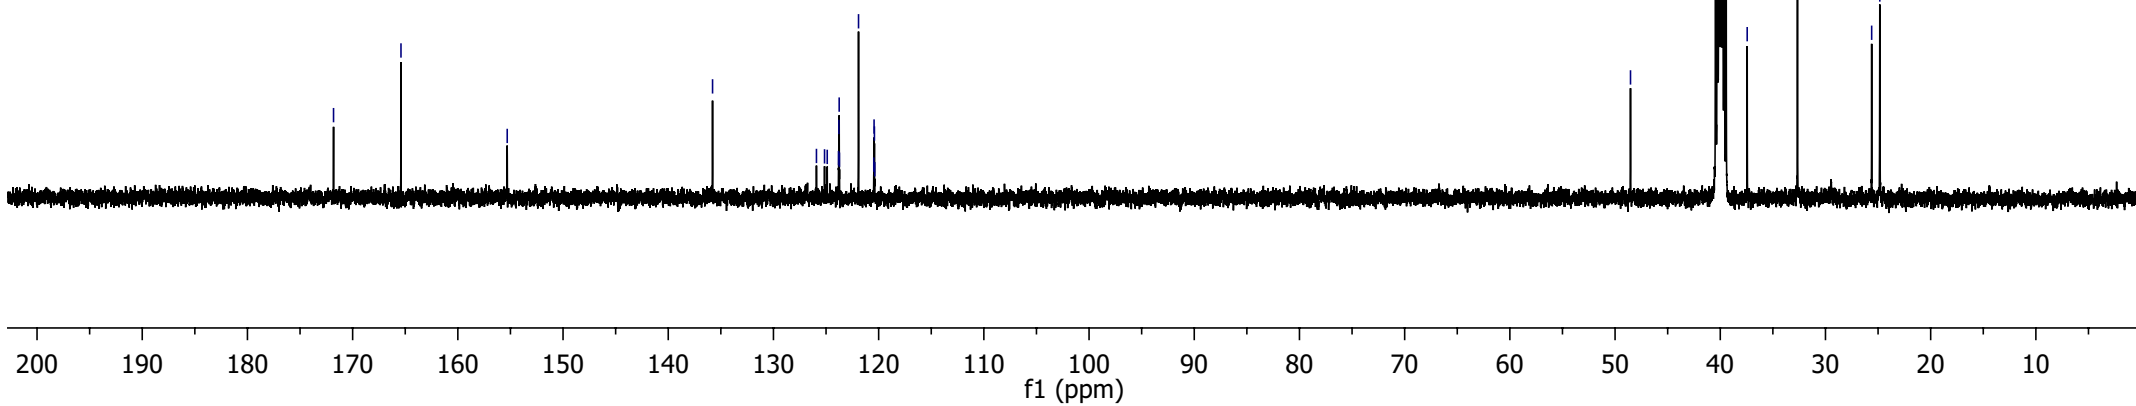

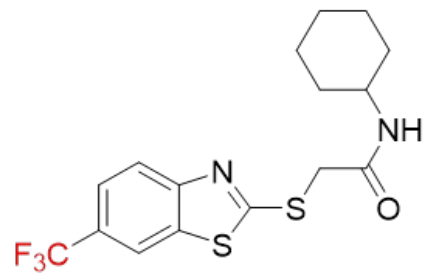

**C8**

<sup>19</sup>F NMR (DMSO-*d*<sub>6</sub>, 471 MHz)

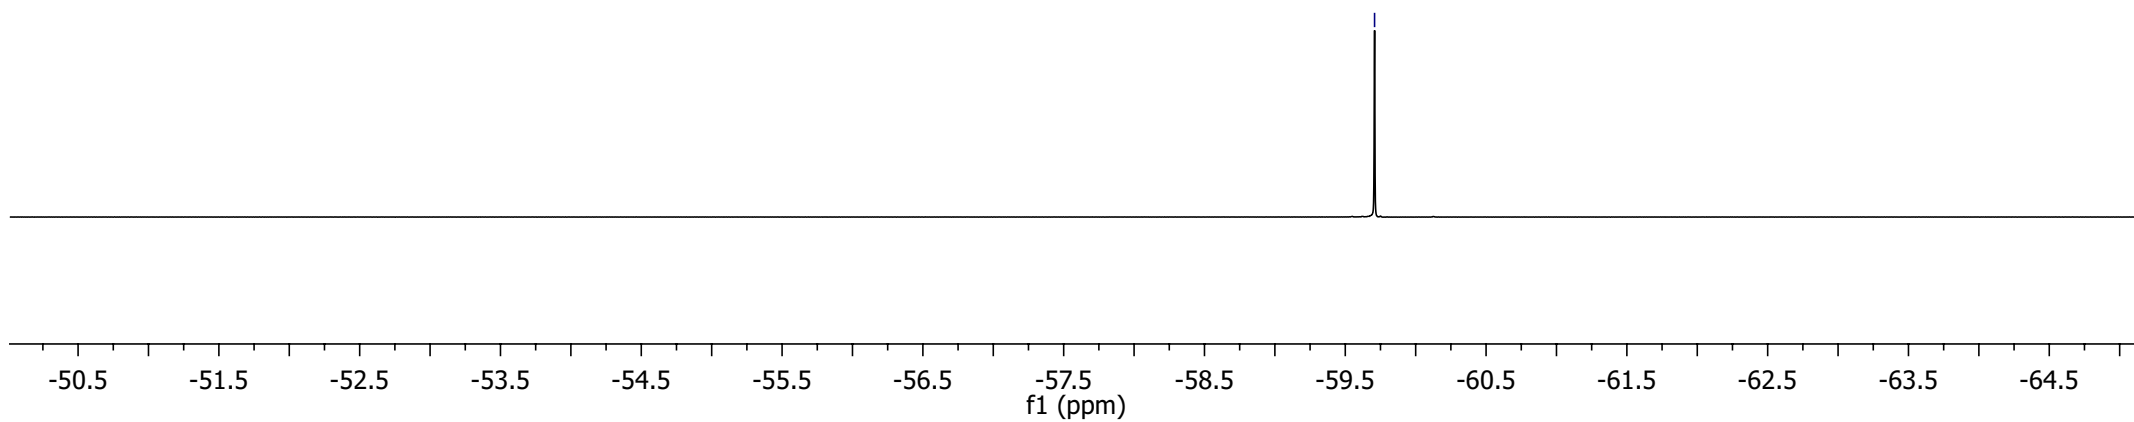

8.245  
8.229  
8.195  
8.192  
7.904  
7.887  
7.484  
7.483  
7.479  
7.478  
7.467  
7.465  
7.462

4.133  
3.582  
3.575  
3.566  
3.560  
3.554  
3.546  
3.539  
3.534  
3.526  
3.518

1.755  
1.750  
1.731  
1.726  
1.690  
1.683  
1.675  
1.665  
1.657  
1.552  
1.545  
1.535  
1.527  
1.297  
1.273  
1.249  
1.233  
1.226  
1.194  
1.173  
1.168  
1.150  
1.126

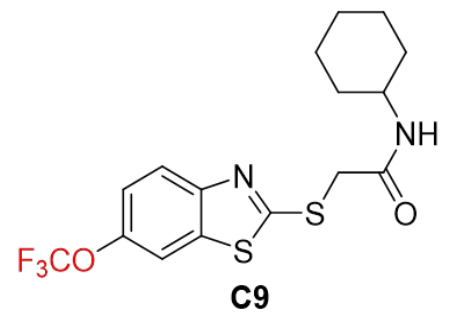

<sup>1</sup>H NMR (DMSO-d<sub>6</sub>, 500 MHz)

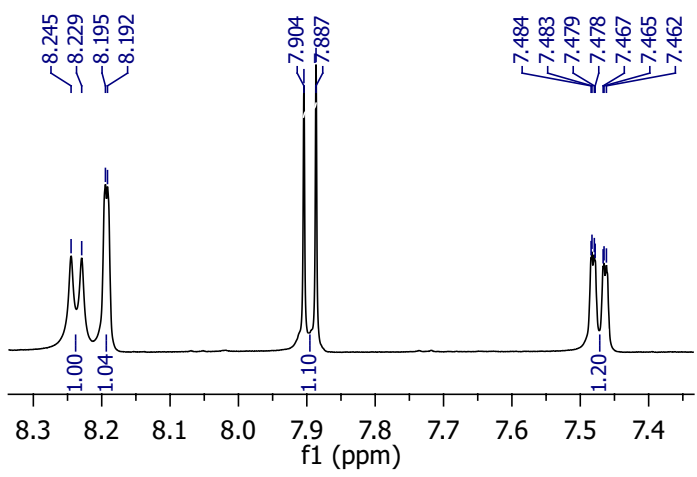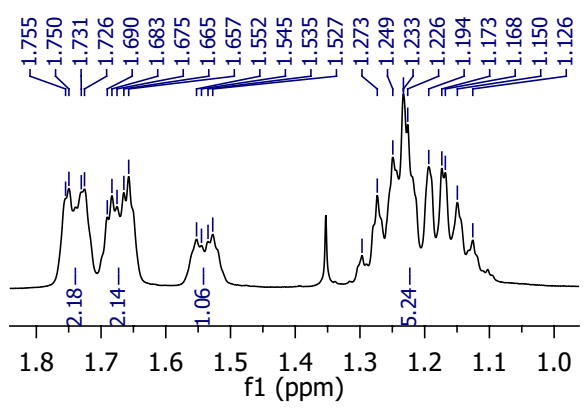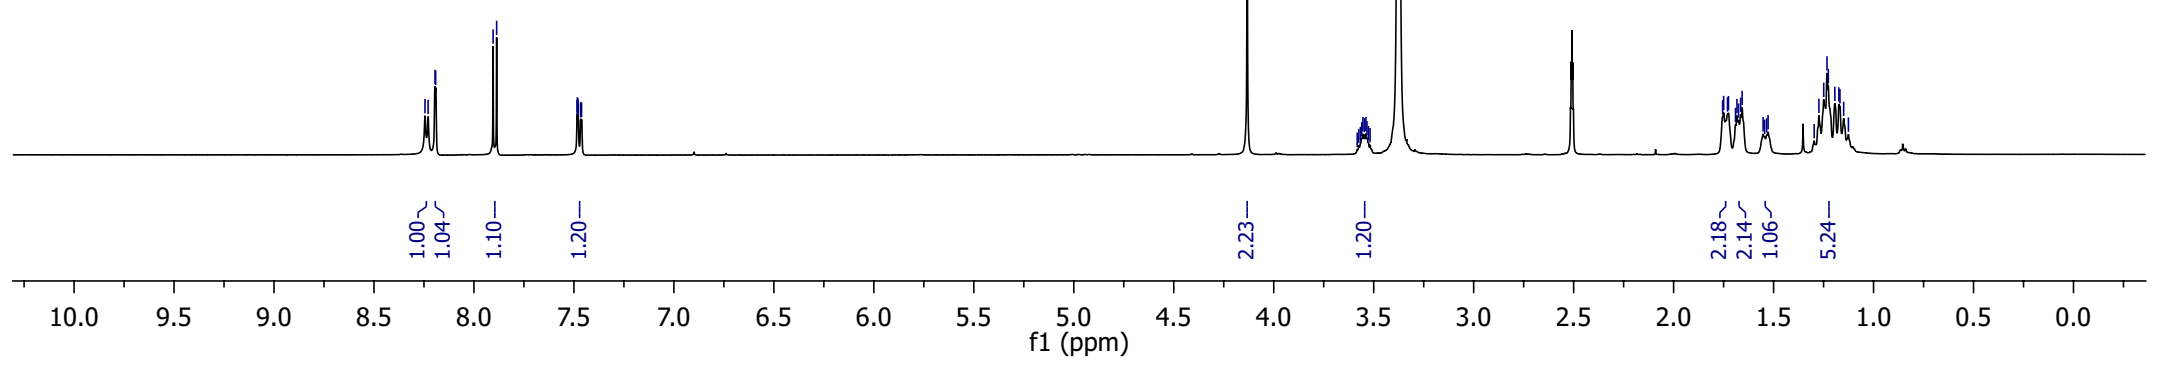



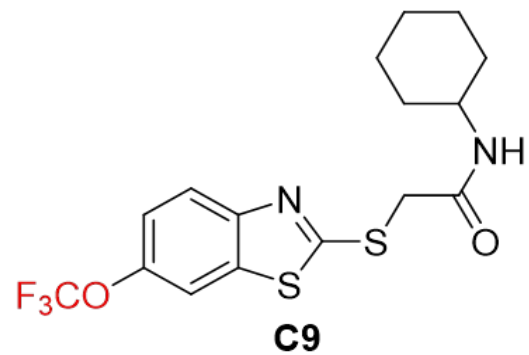

$^{13}\text{C}$  NMR (DMSO- $d_6$ , 125 MHz)

—169.15  
—165.49  
—151.93  
—145.18  
—136.41  
—122.40  
—121.63  
—120.62  
—119.59  
—115.56

—48.50  
—37.41  
—32.66  
—25.61  
—24.84

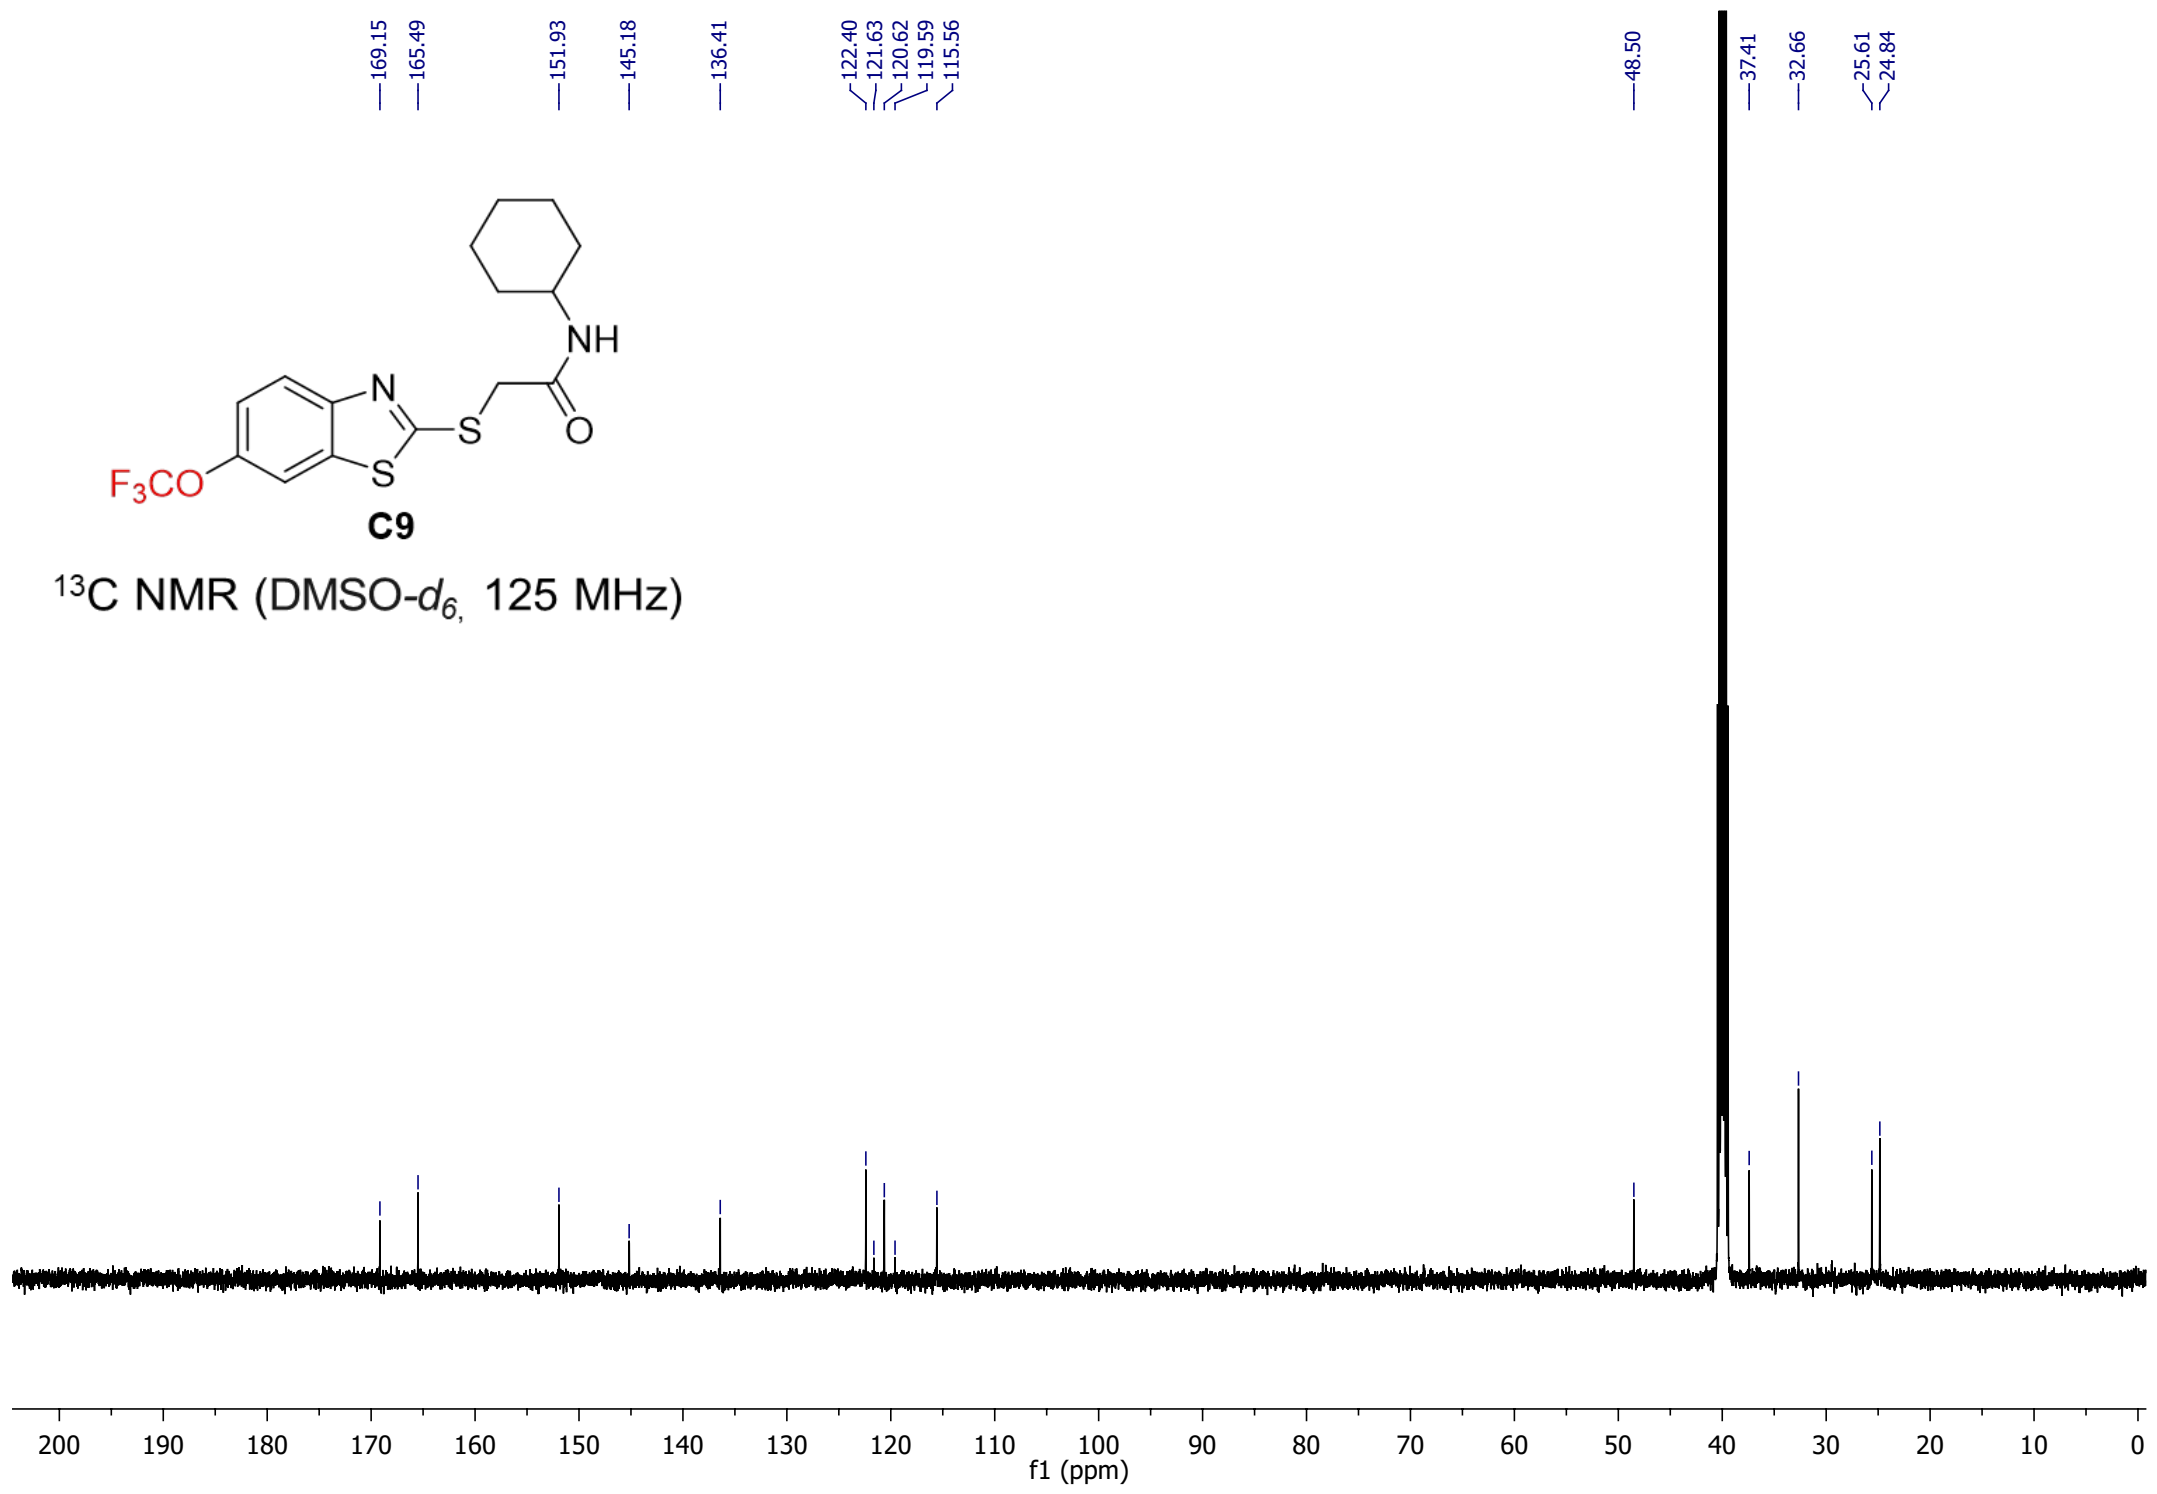

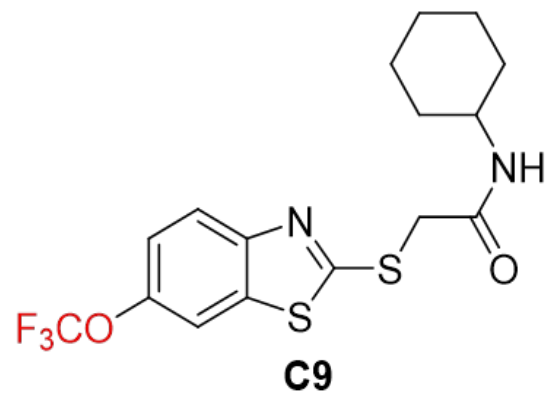

$^{19}\text{F}$  NMR (DMSO- $d_6$ , 471 MHz)

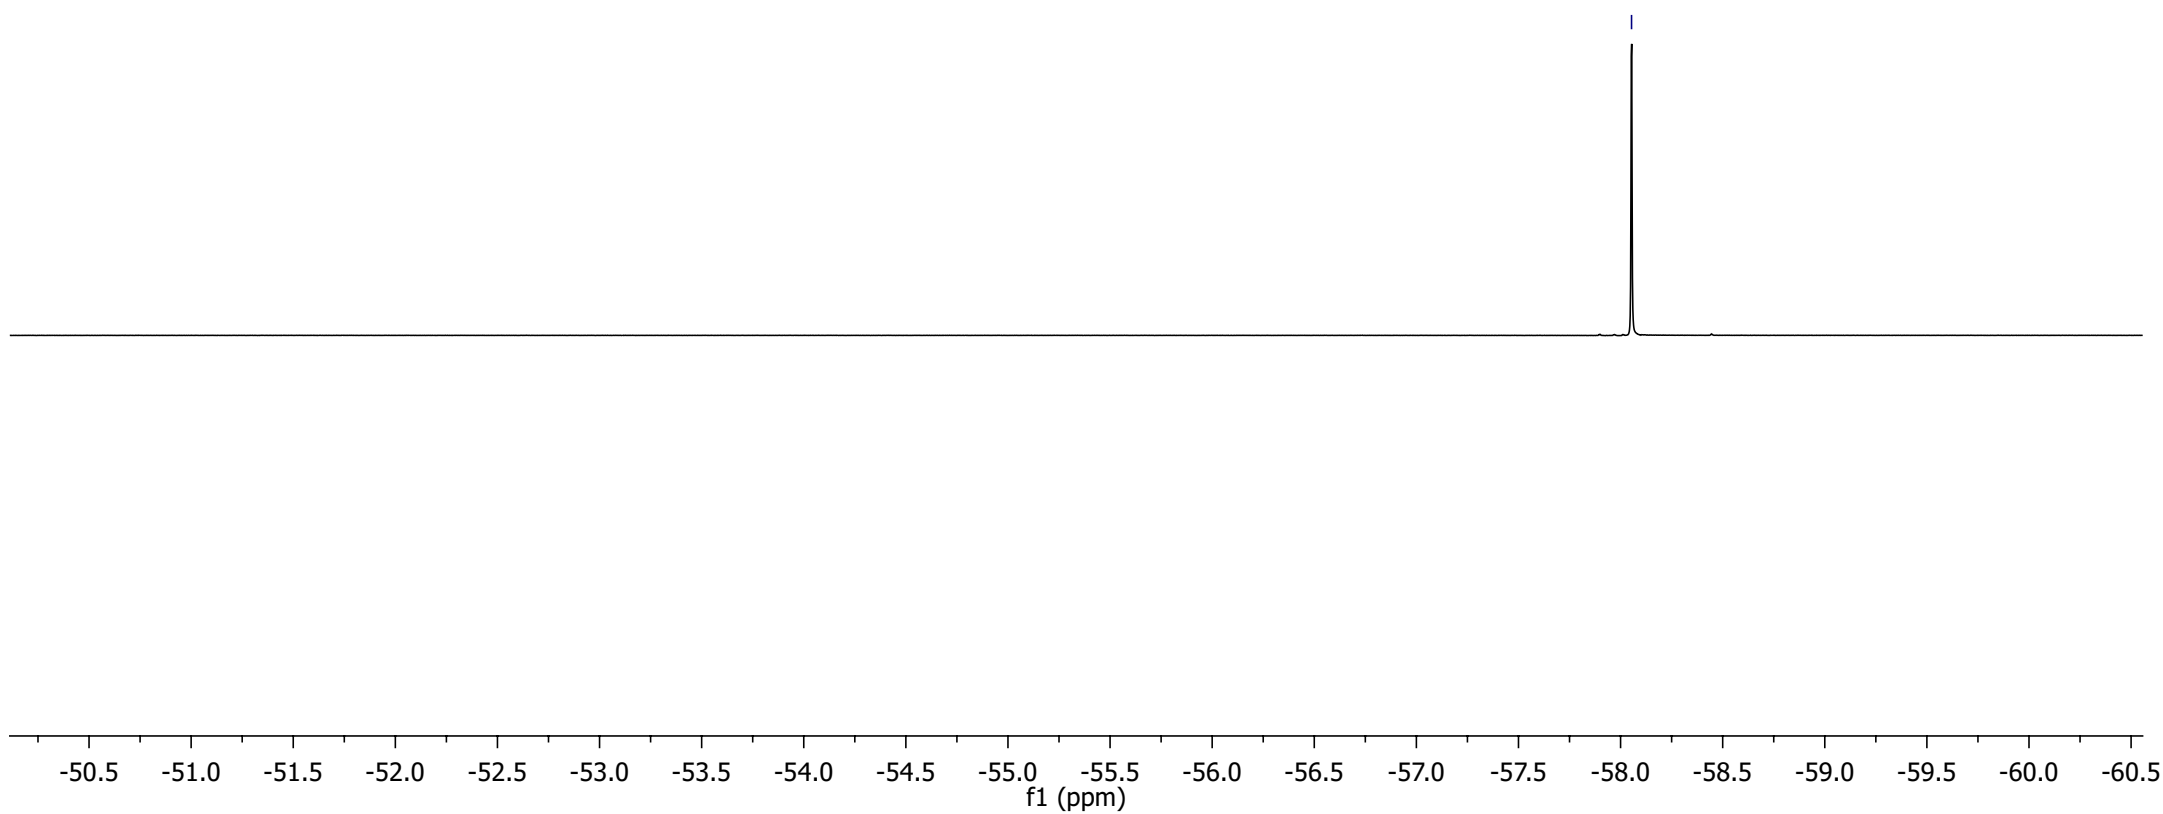

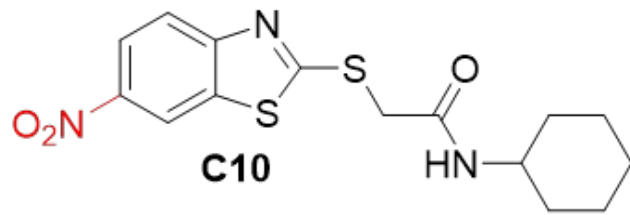

<sup>1</sup>H NMR (DMSO-d<sub>6</sub>, 500 MHz)

9.110  
9.106  
8.321  
8.316  
8.303  
8.298  
8.289  
8.274  
7.976  
7.959

4.196  
3.584  
3.569  
3.563  
3.556  
3.548  
3.543  
3.536  
3.527

1.761  
1.751  
1.737  
1.698  
1.691  
1.684  
1.673  
1.665  
1.559  
1.551  
1.534  
1.279  
1.256  
1.231  
1.206  
1.180  
1.157  
1.134

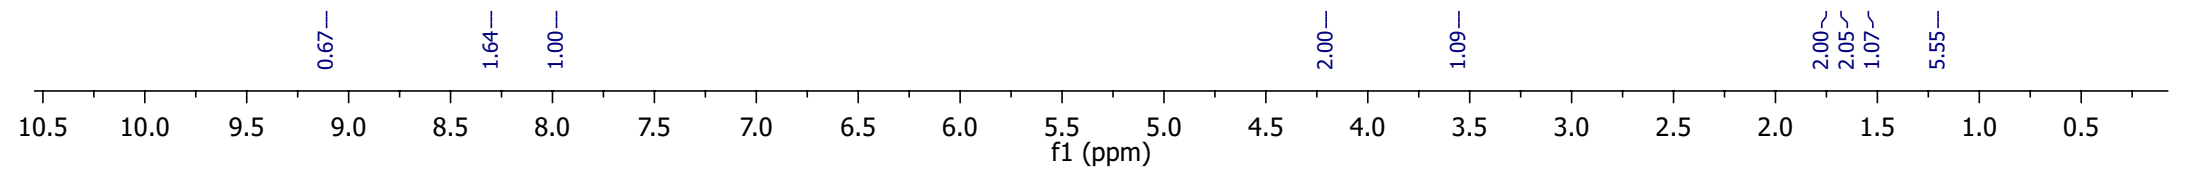

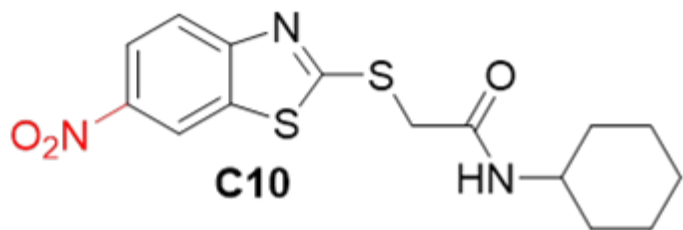

<sup>13</sup>C NMR (DMSO-*d*<sub>6</sub>, 125 MHz)

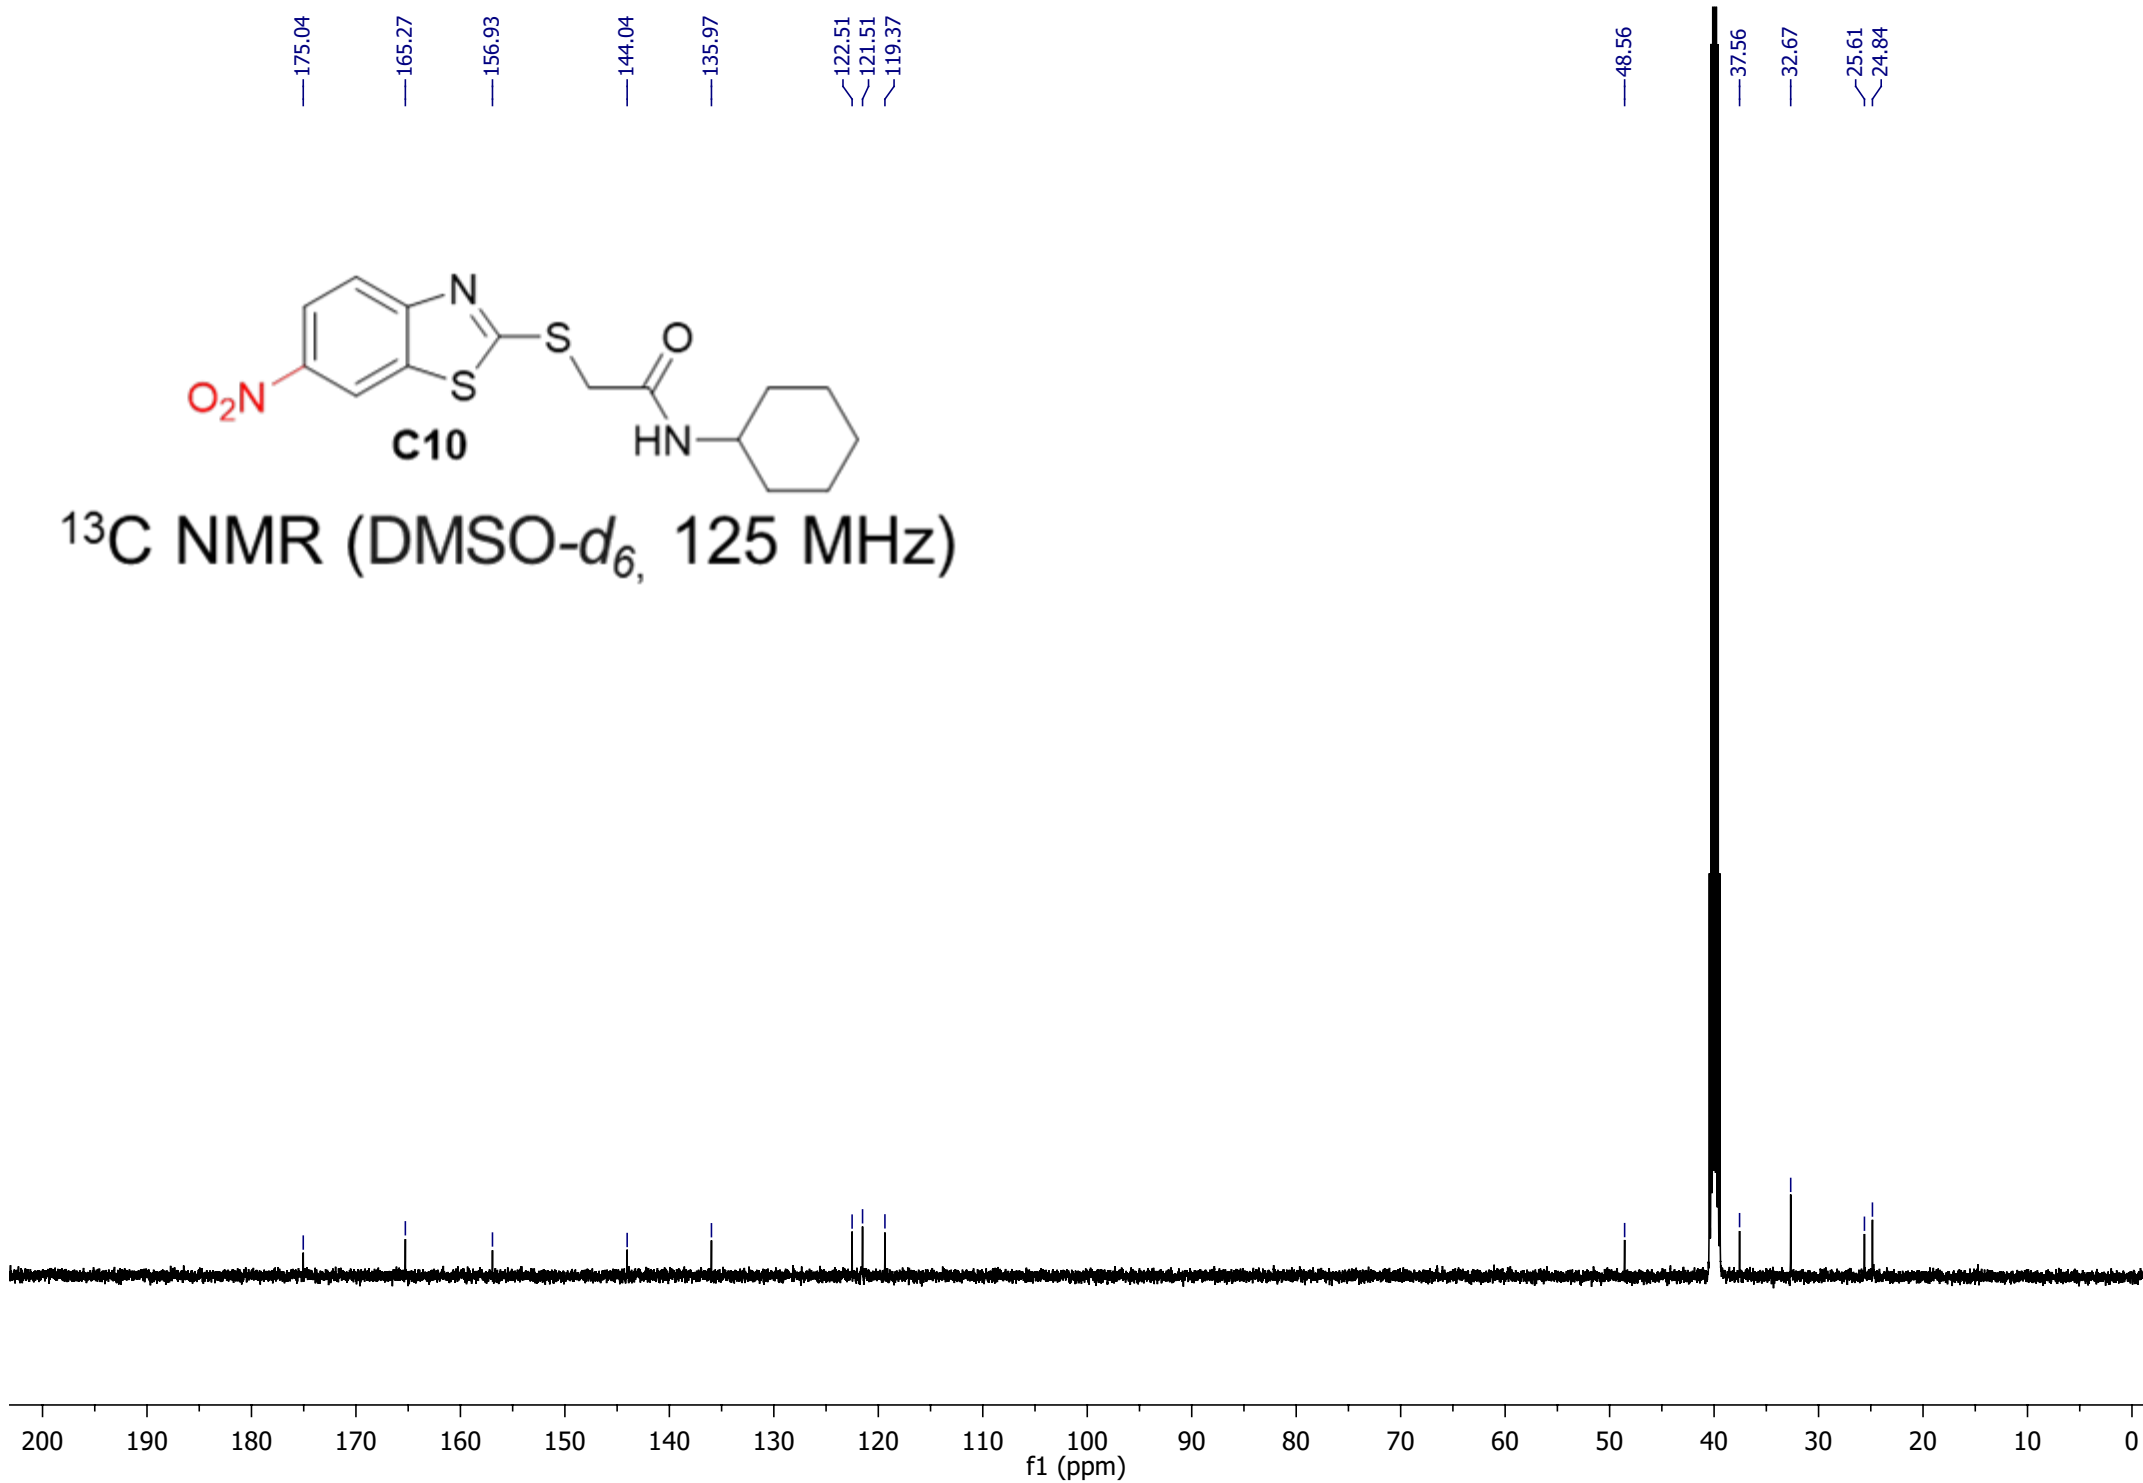

8.229  
8.214  
8.035  
8.030  
8.019  
8.014  
7.744  
7.739  
7.727  
7.722

4.113  
3.998

1.762  
1.738  
1.683  
1.664  
1.657  
1.554  
1.544  
1.536  
1.529  
1.272  
1.246  
1.237  
1.229  
1.222  
1.197  
1.177  
1.160  
1.154  
1.141  
1.136  
1.118  
1.111

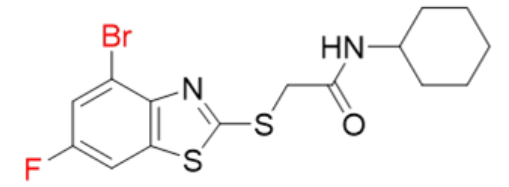

C11

<sup>1</sup>H NMR (DMSO-d<sub>6</sub>, 500 MHz)

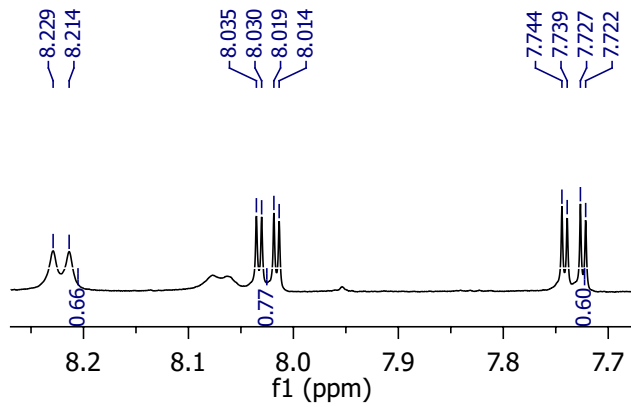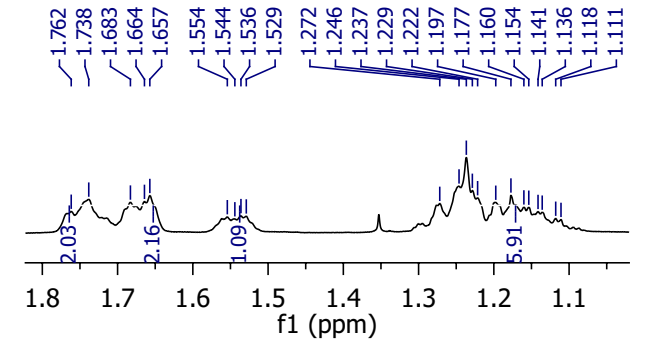

0.66  
0.77  
0.60

1.33  
0.89  
1.66

2.03  
2.16  
1.09  
5.91

10.0  
9.5  
9.0  
8.5  
8.0  
7.5  
7.0  
6.5  
6.0  
5.5  
5.0  
4.5  
4.0  
3.5  
3.0  
2.5  
2.0  
1.5  
1.0  
0.5  
0.0  
f1 (ppm)

167.87  
167.85  
167.14

160.35  
158.36

147.53  
147.51

136.49  
136.40

118.47  
118.25

114.44  
114.36

107.25  
107.03

48.84

36.56

32.92

25.47

24.89

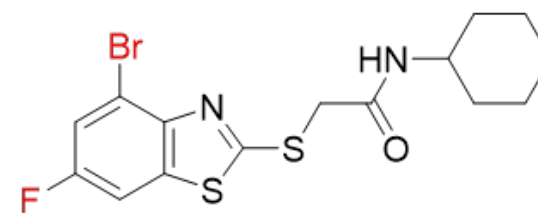

C11

$^{13}\text{C}$  NMR ( $\text{CDCl}_3$ , 125 MHz)

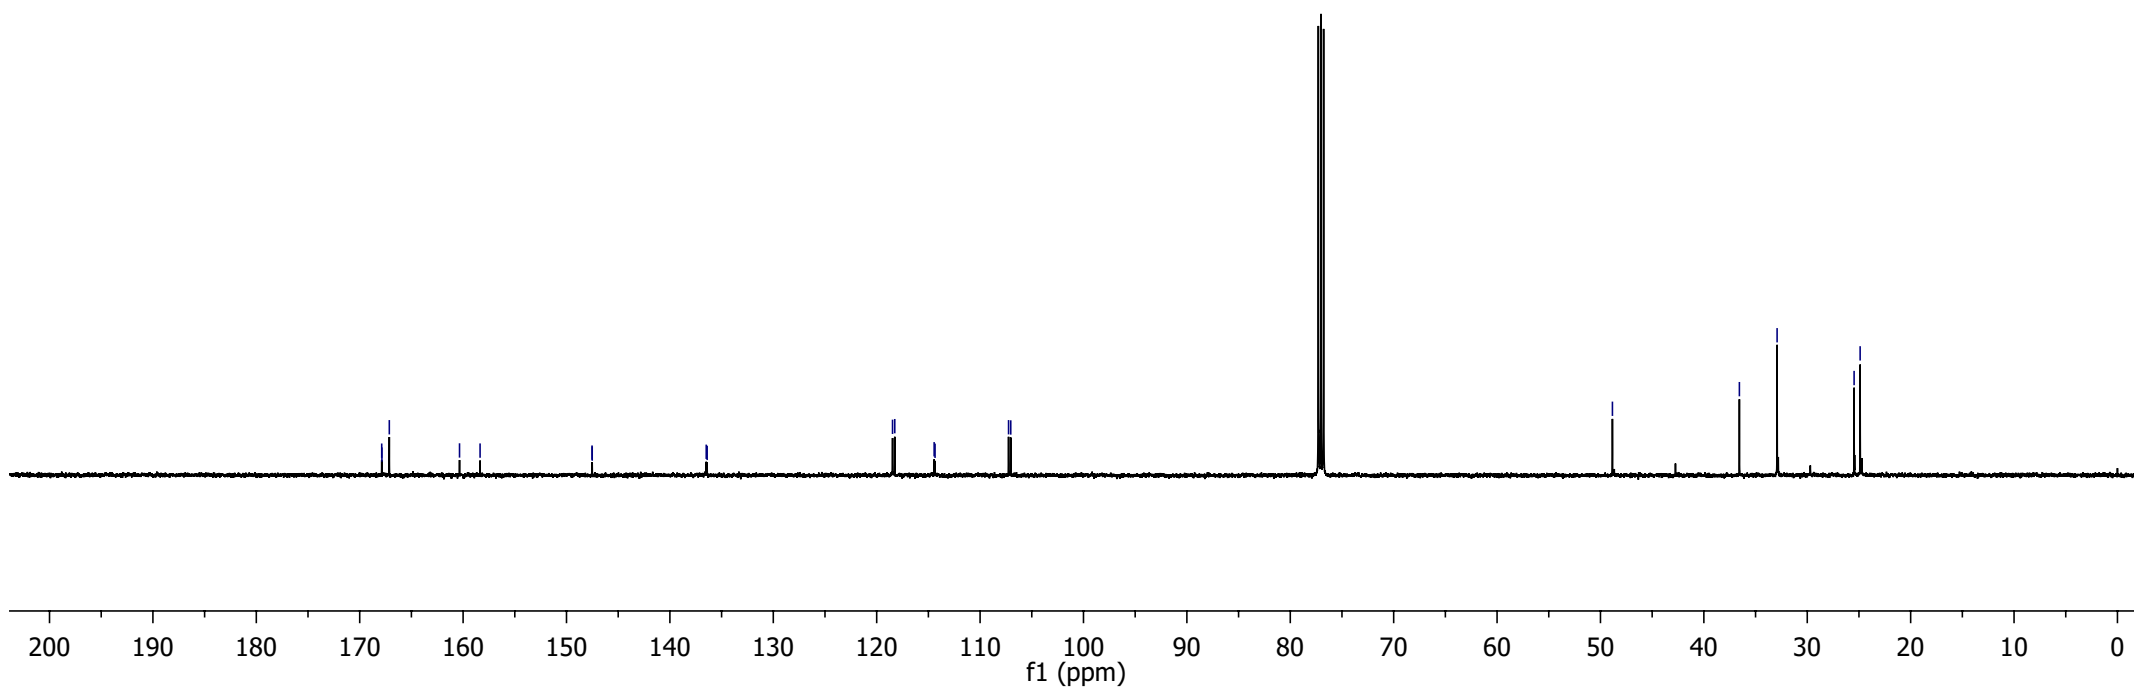

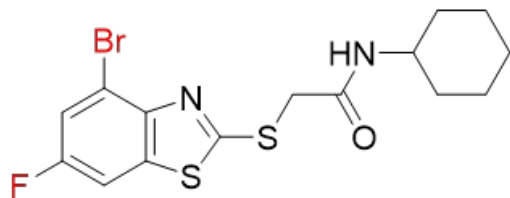

C11

$^{19}\text{F}$  NMR (DMSO- $d_6$ , 471 MHz)

-115.626  
-115.644  
-115.663

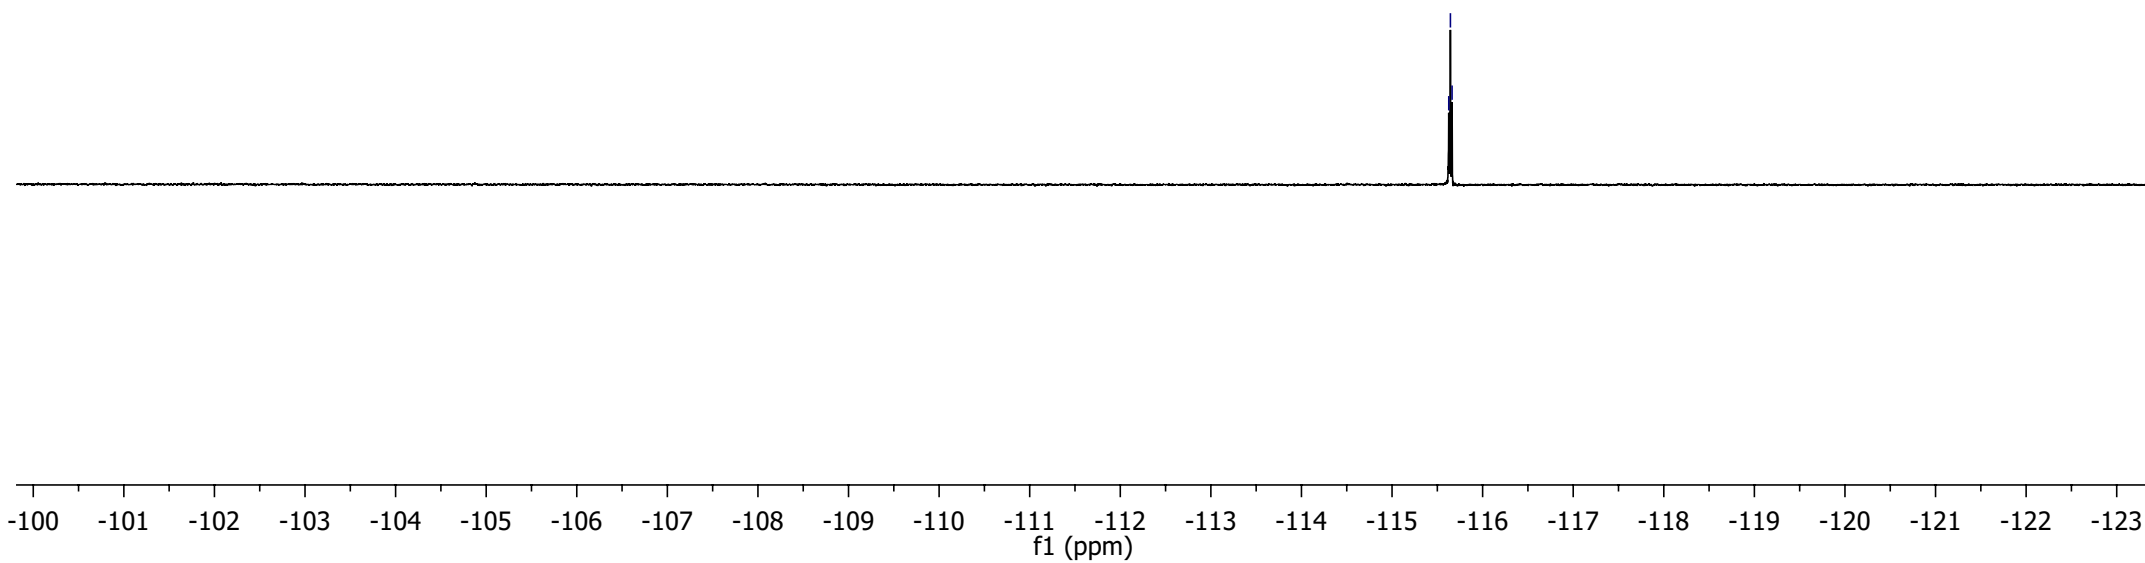

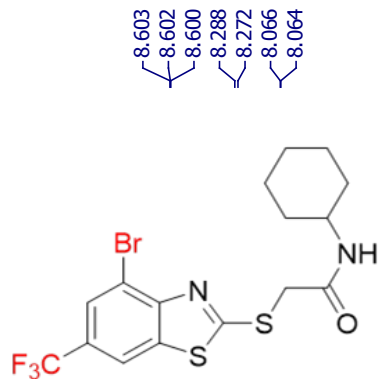

C12

$^1\text{H}$  NMR (DMSO- $d_6$ , 500 MHz)

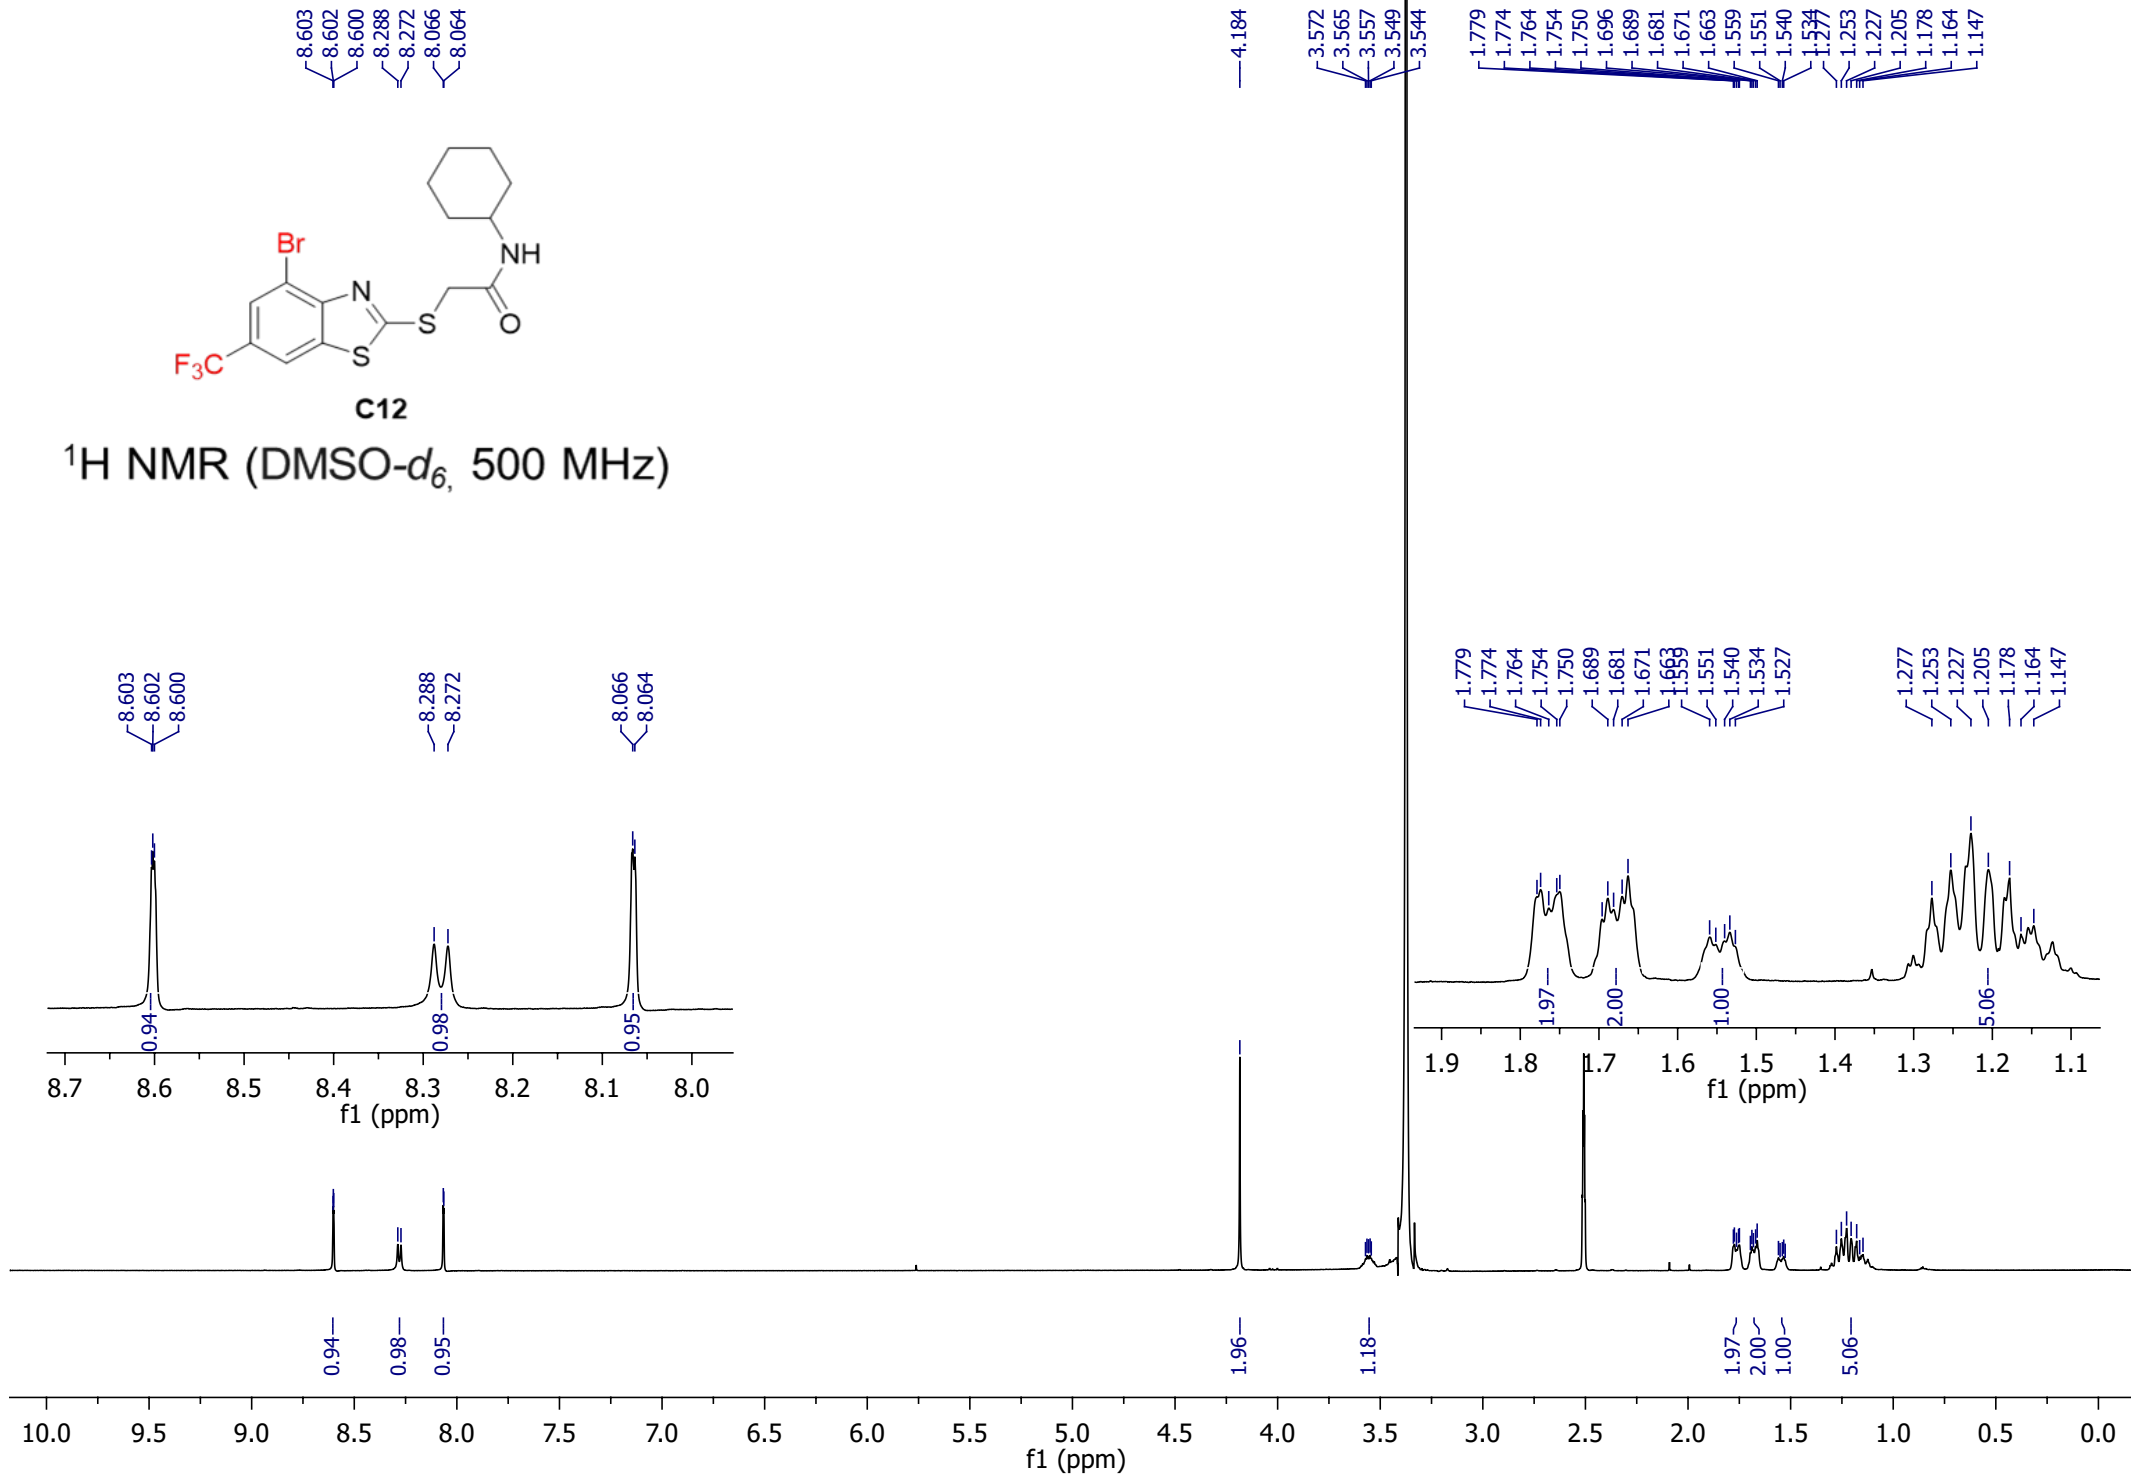



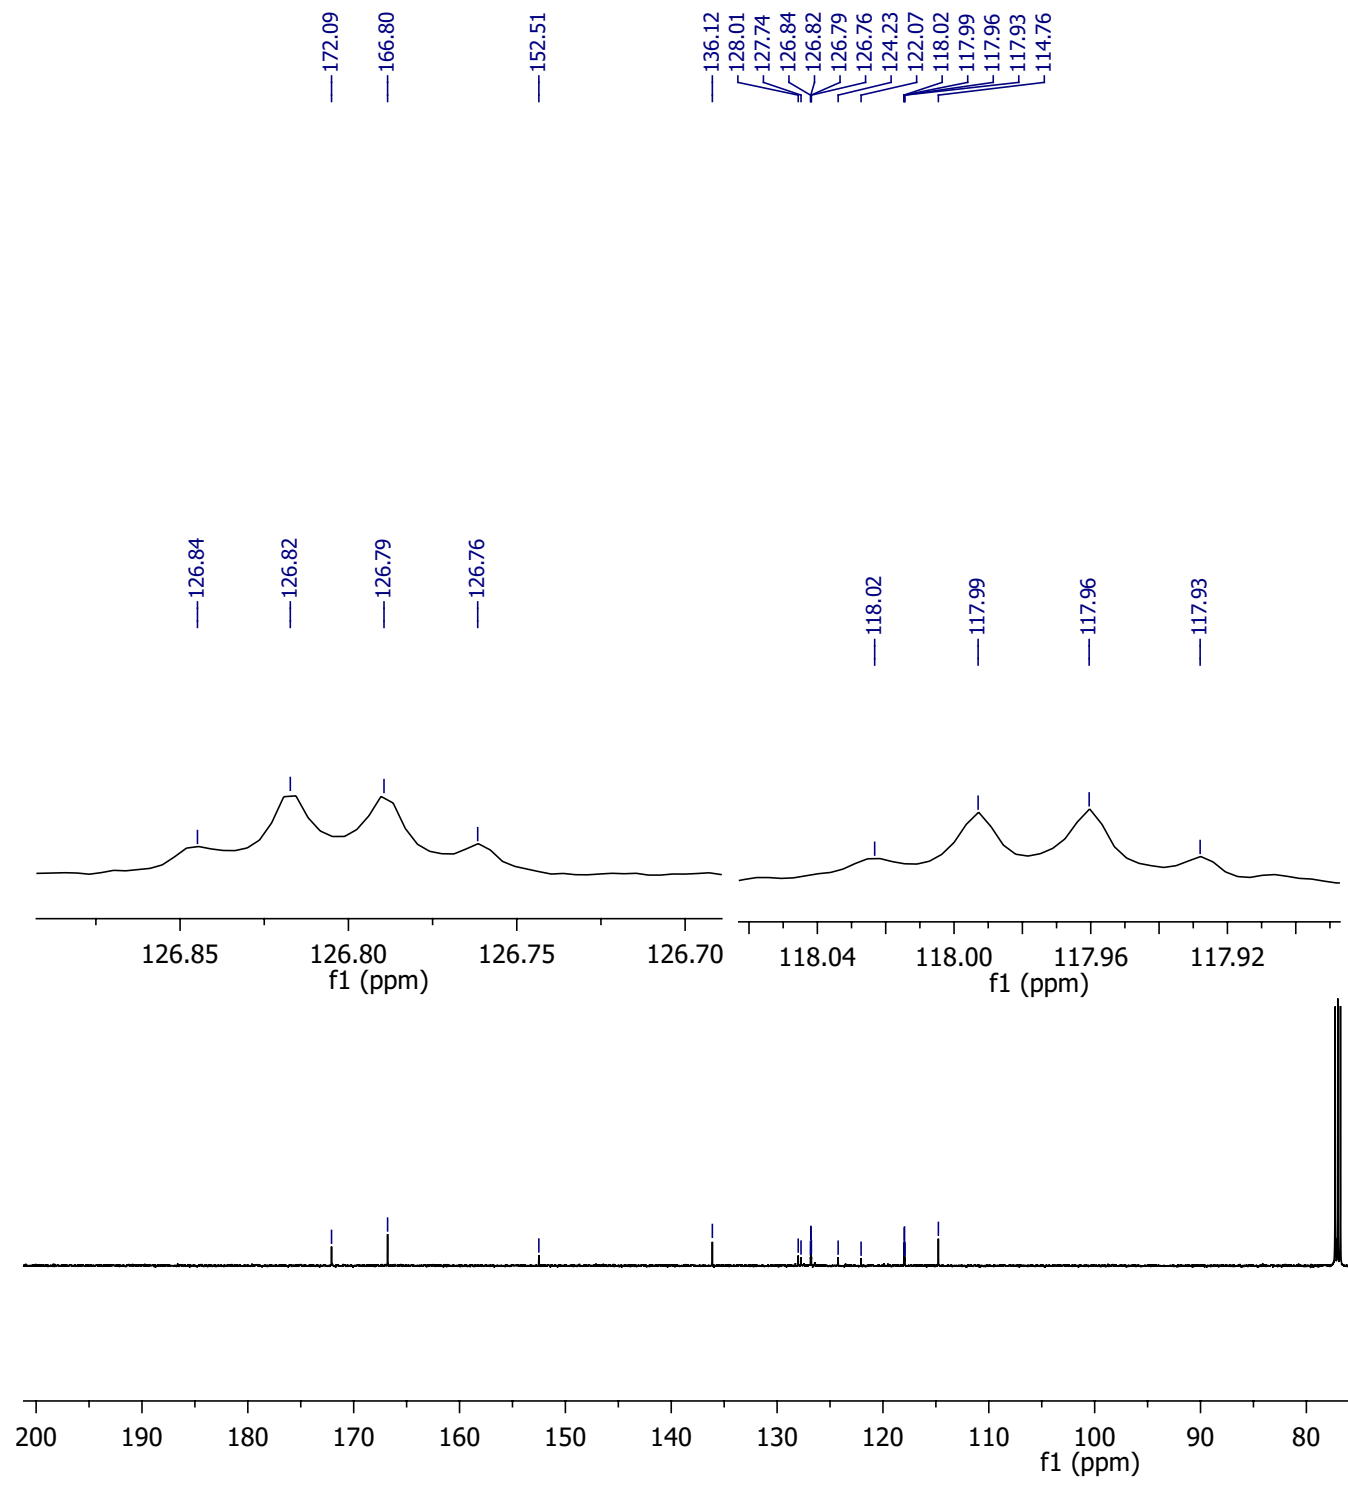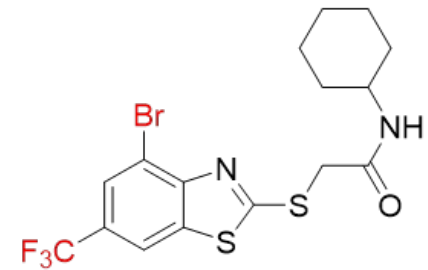

**C12**  
<sup>13</sup>C NMR (CDCl<sub>3</sub>, 125 MHz)

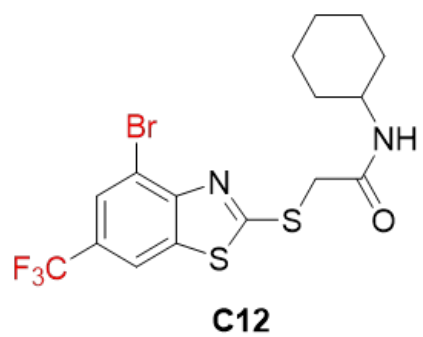

$^{19}\text{F}$  NMR ( $\text{CDCl}_3$ , 471 MHz)

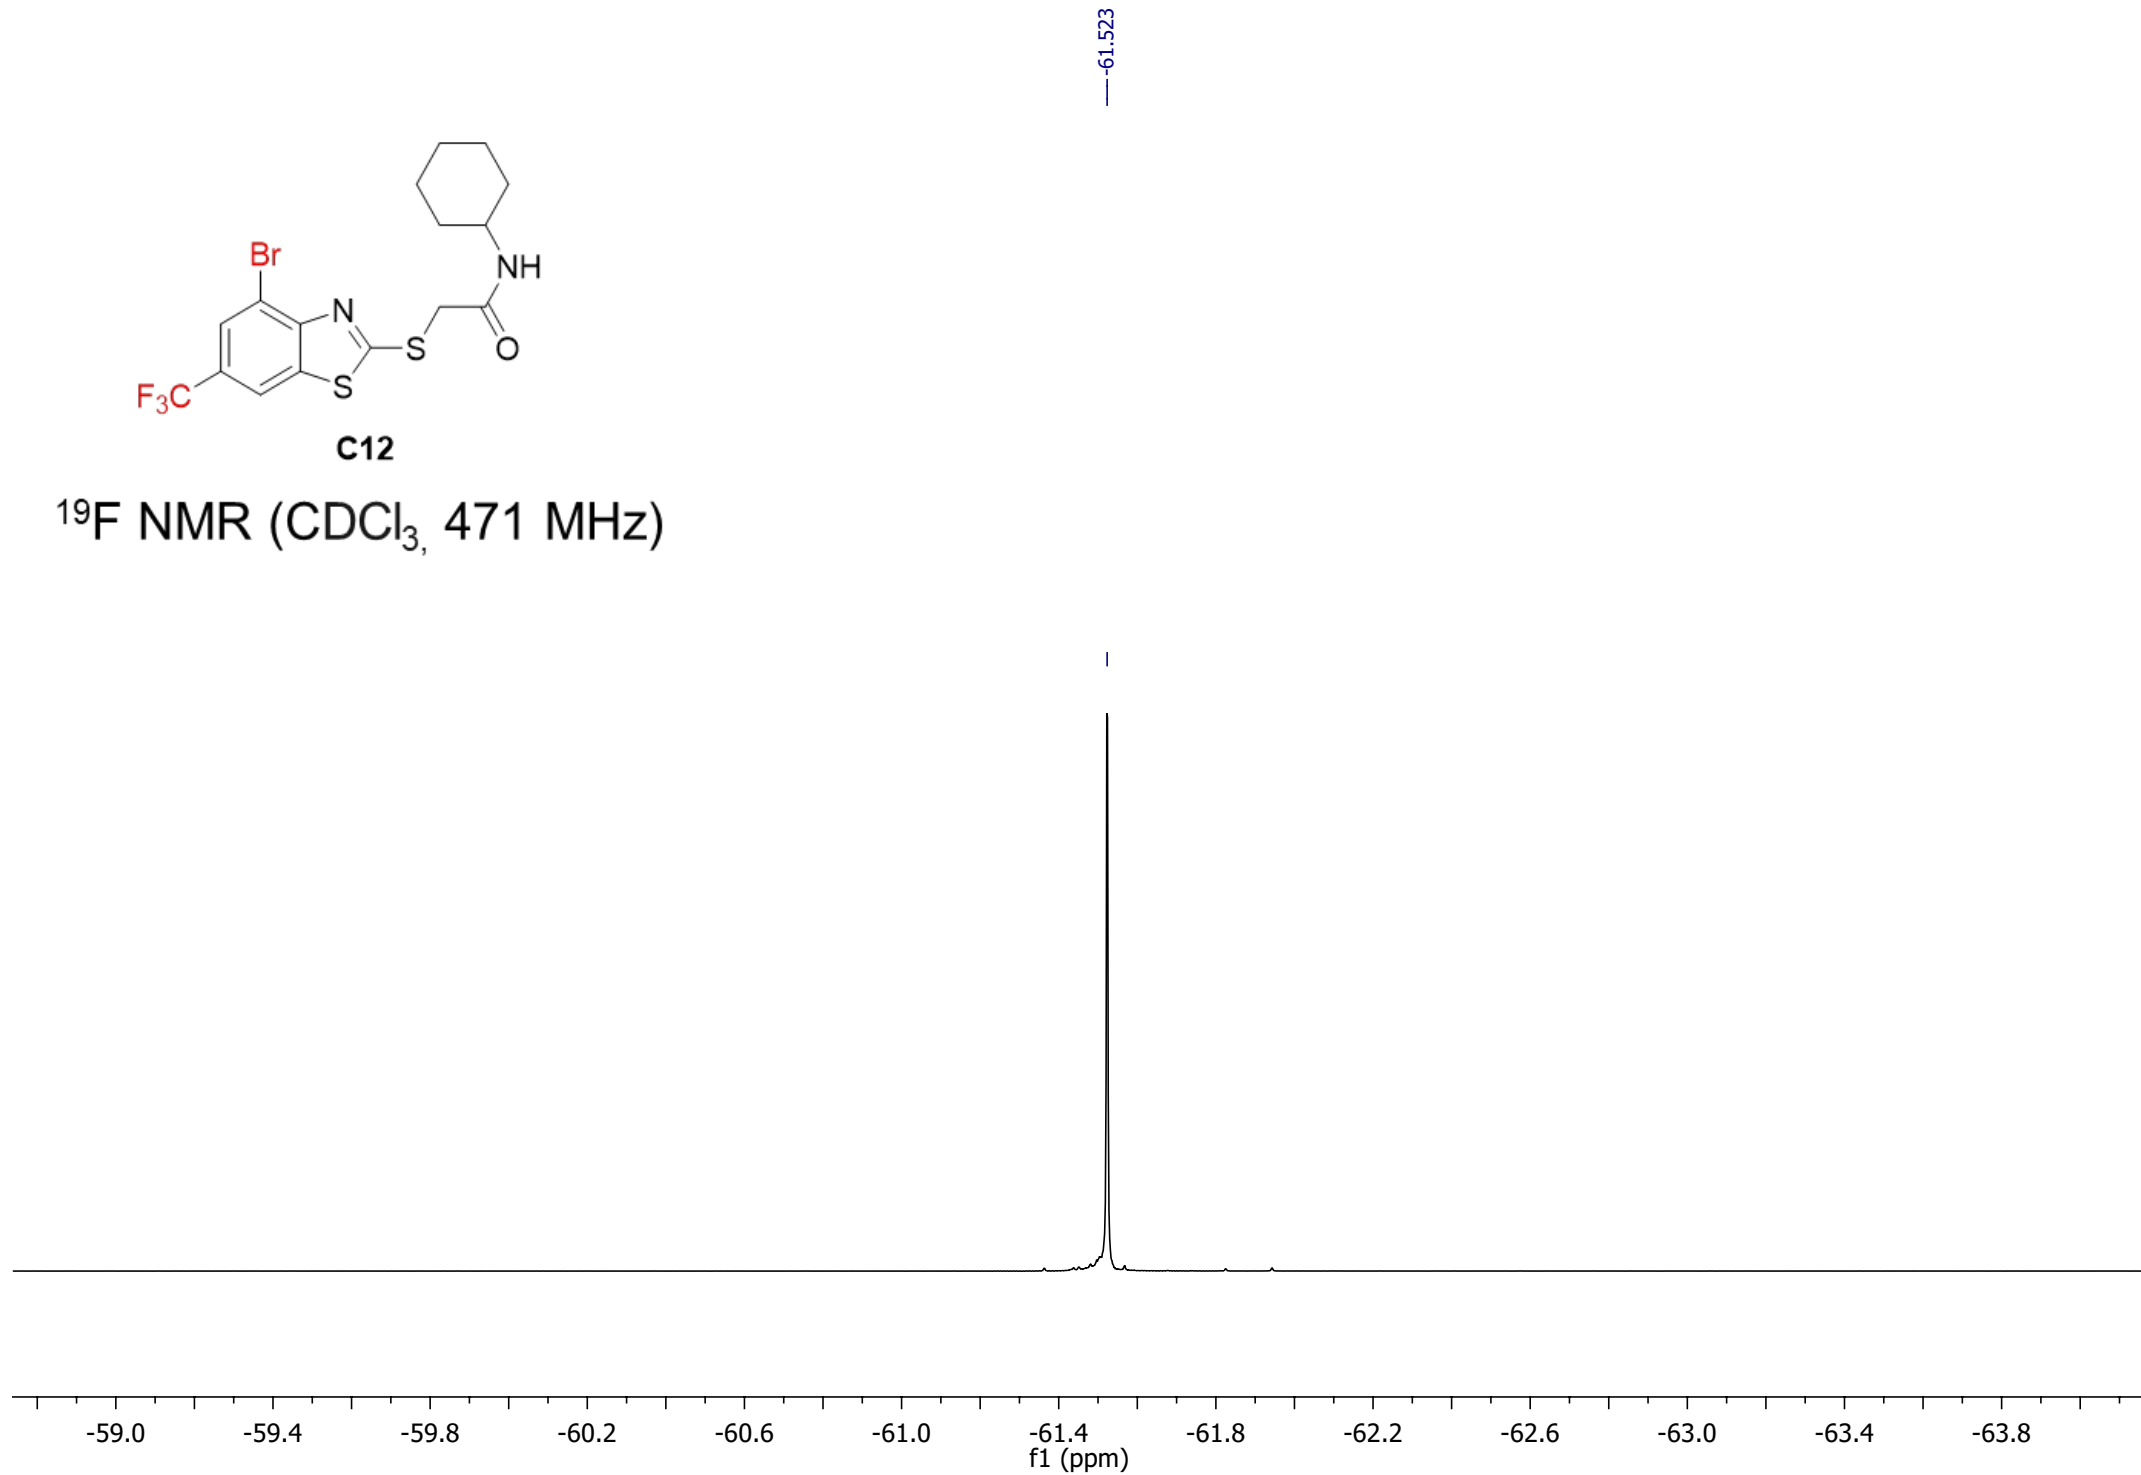

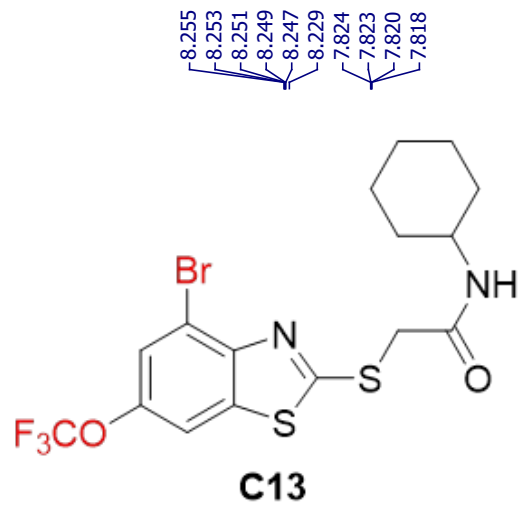

<sup>1</sup>H NMR (DMSO-d<sub>6</sub>, 500 MHz)

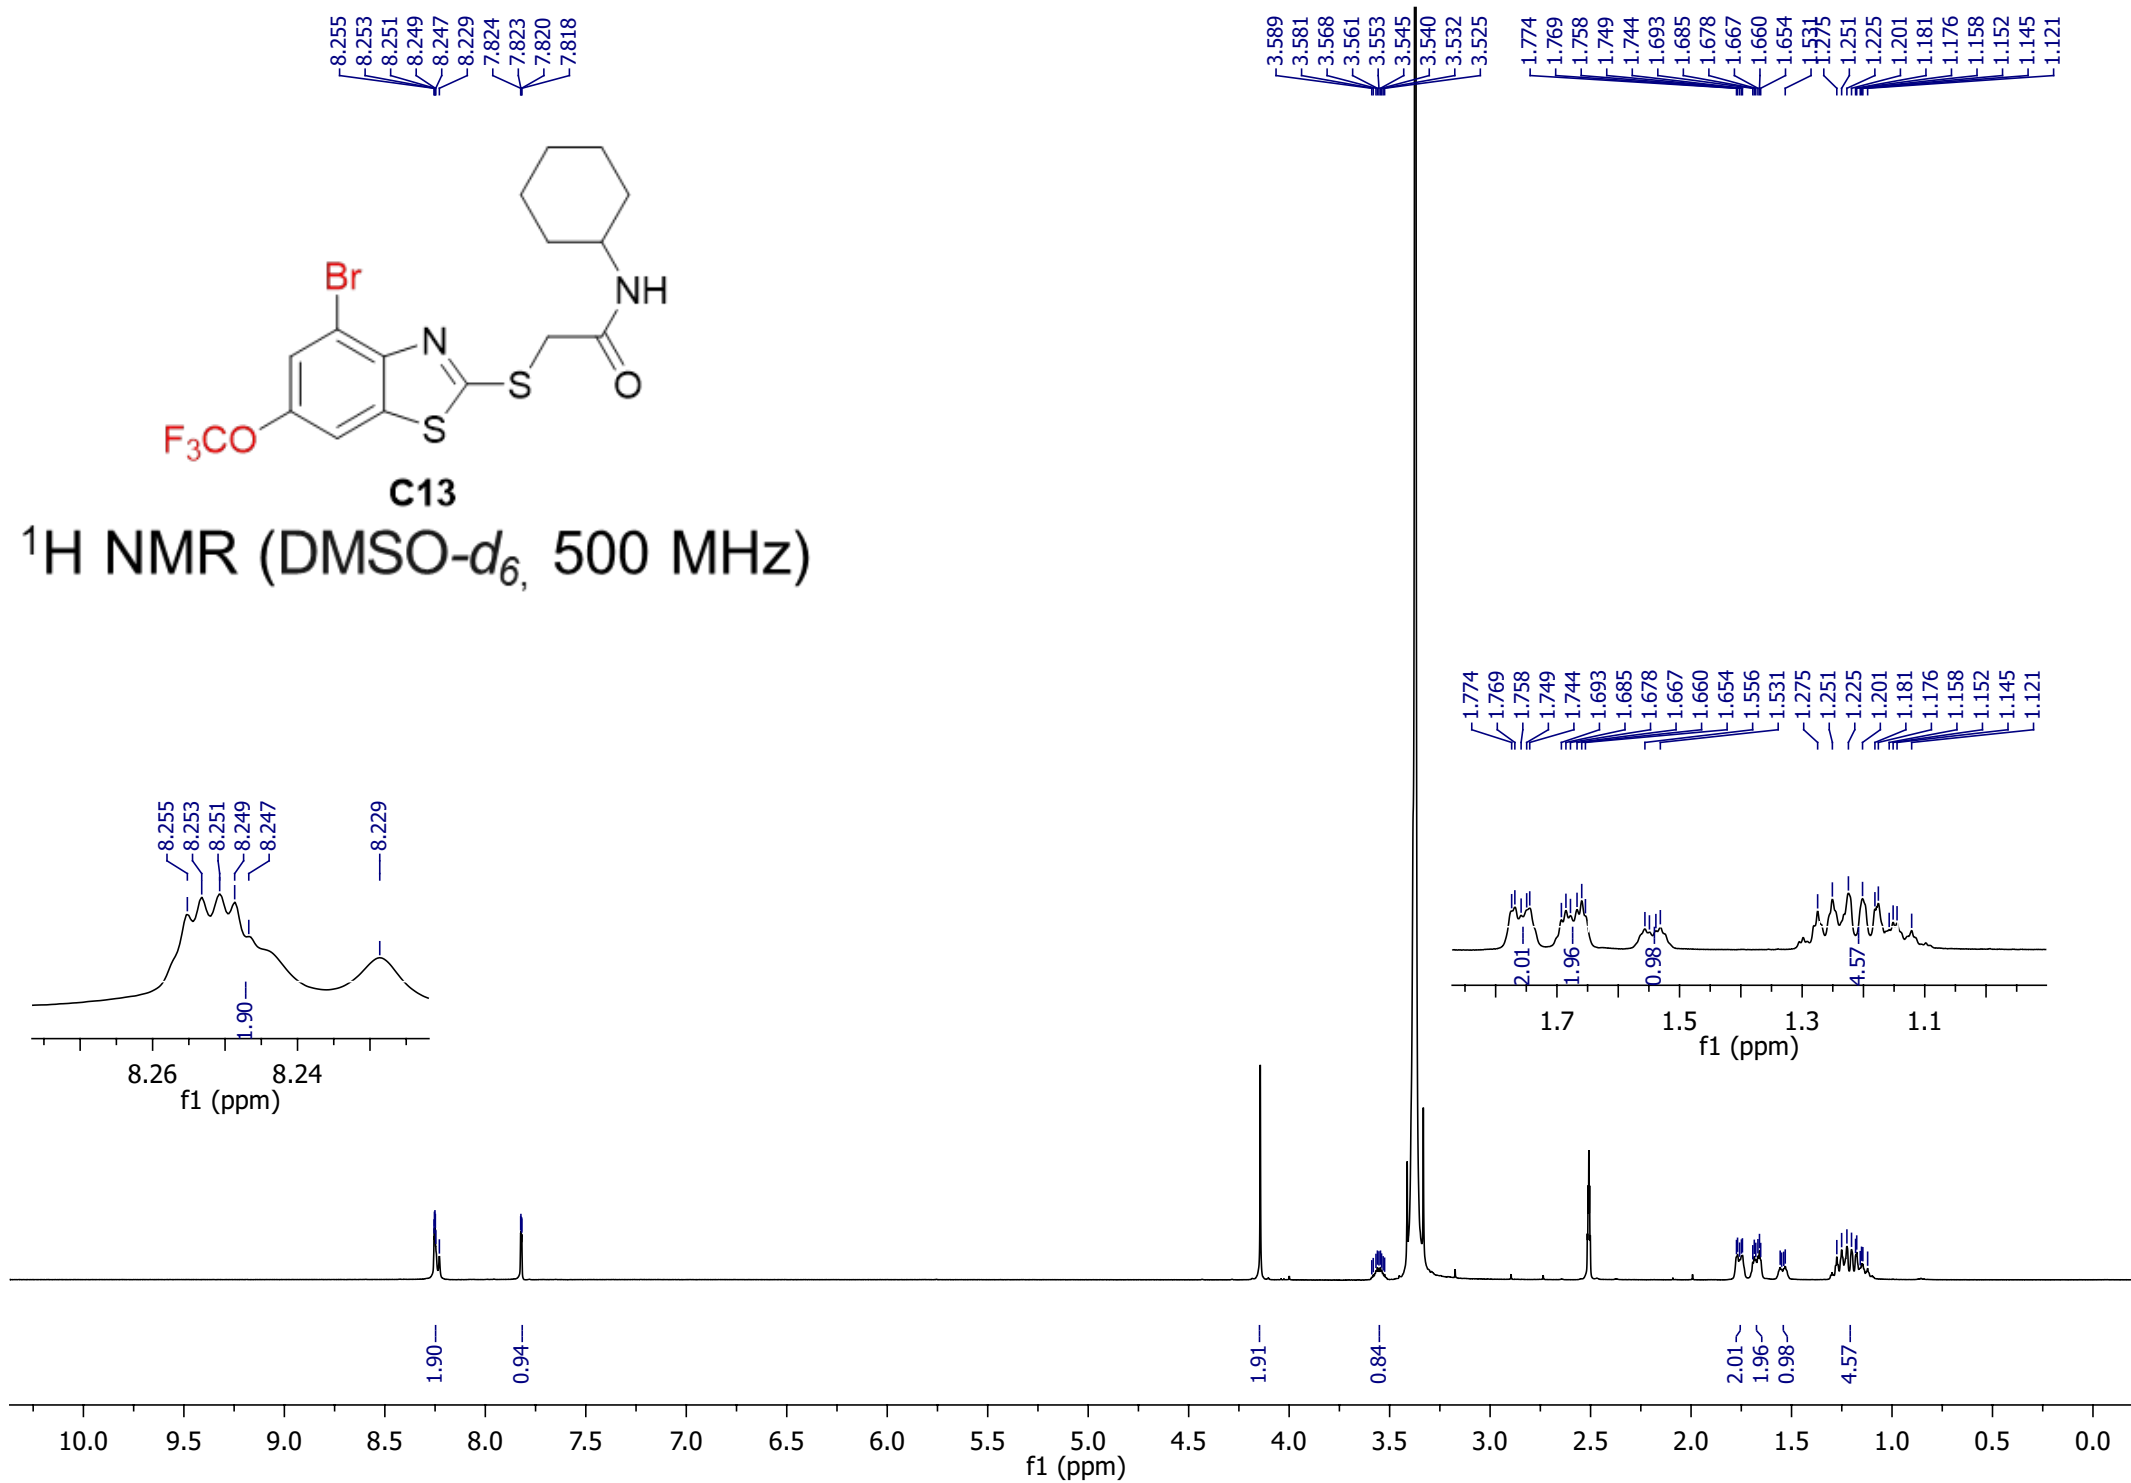

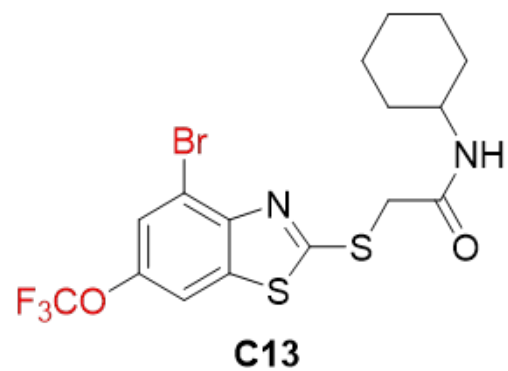

<sup>13</sup>C NMR (DMSO-d<sub>6</sub>, 125 MHz)

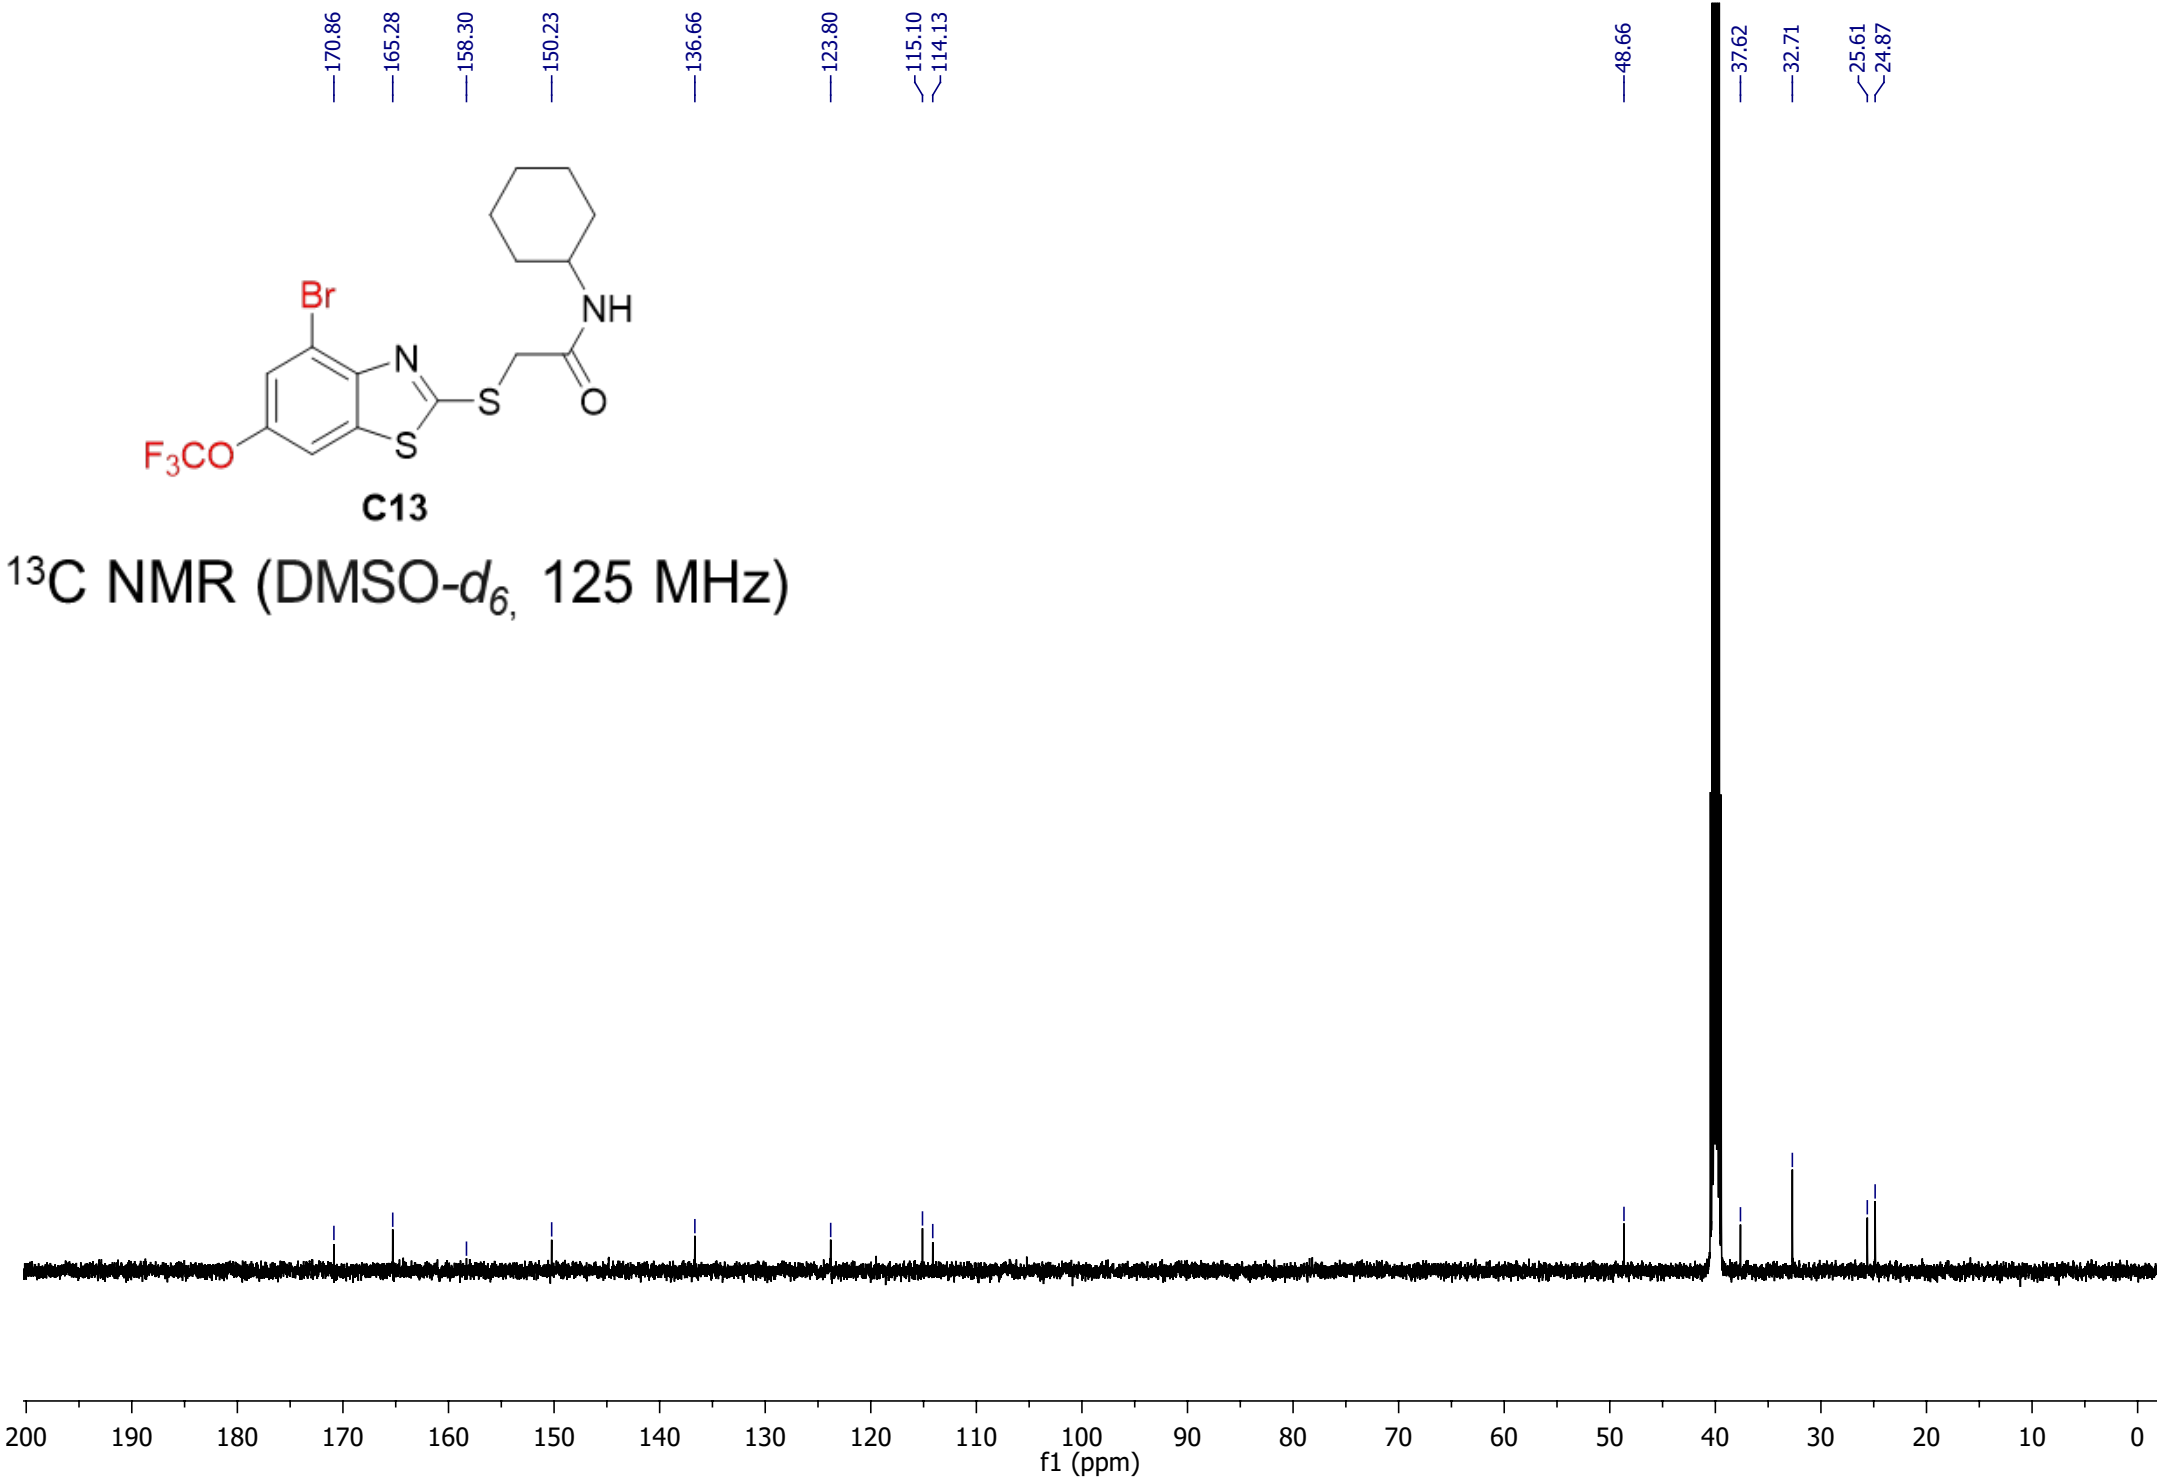

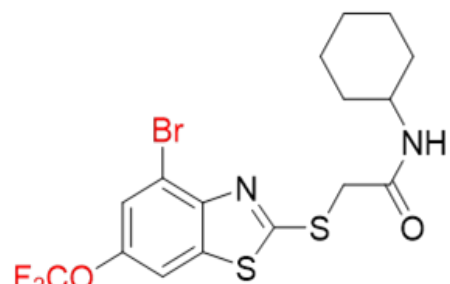

C13

<sup>19</sup>F NMR (DMSO-*d*<sub>6</sub>, 471 MHz)

---57.179

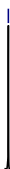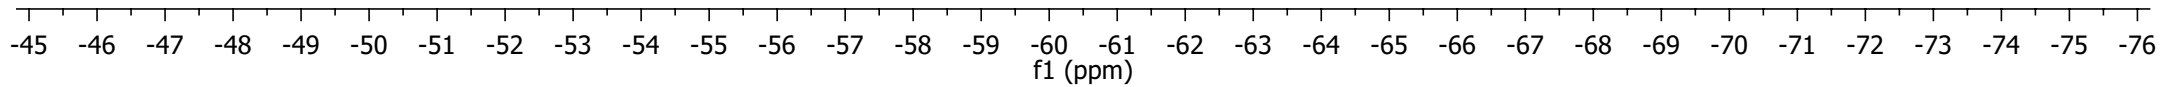

8.711  
8.708  
8.697  
8.694  
8.363  
8.348  
8.345  
8.151  
7.747  
7.744  
7.732  
7.719  
7.716  
7.262

3.841  
3.833  
3.813  
3.805  
3.797  
3.776  
3.768

1.885  
1.879  
1.869  
1.861  
1.597  
1.589  
1.577  
1.570  
1.323  
1.317  
1.290  
1.284  
1.276  
1.268  
1.103  
1.079  
1.060  
1.055

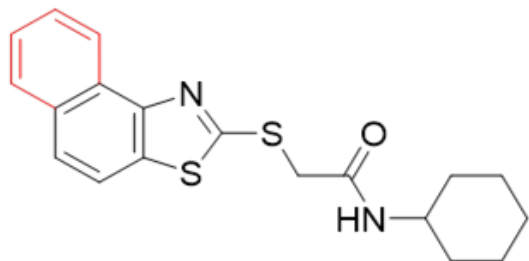

$^1\text{H}$  NMR ( $\text{CDCl}_3$ , 500 MHz)

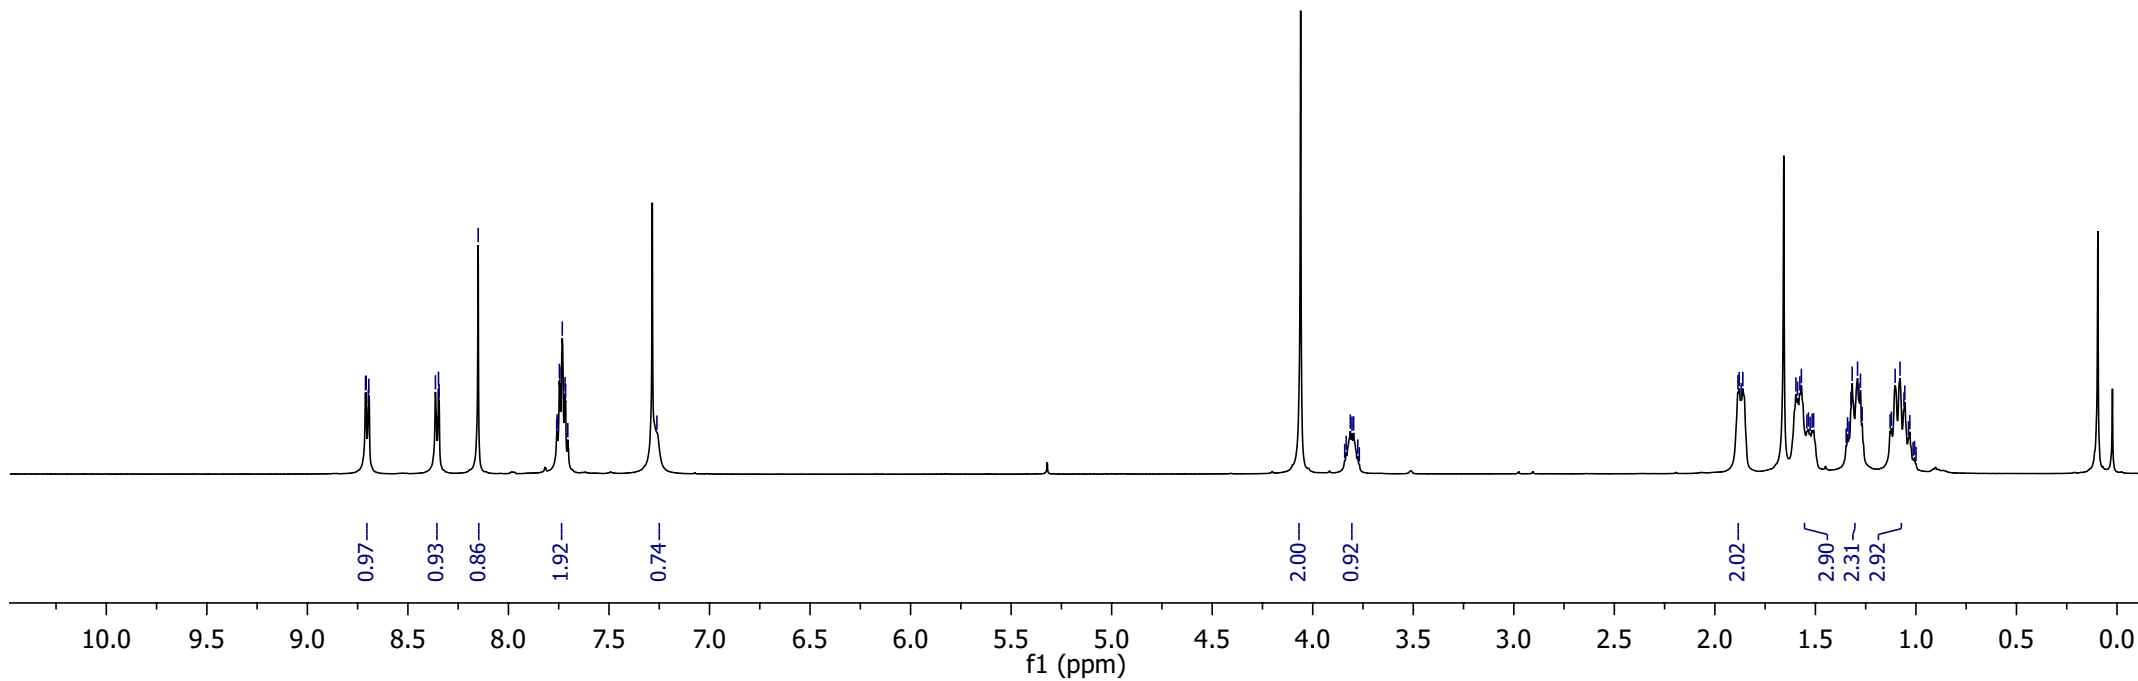

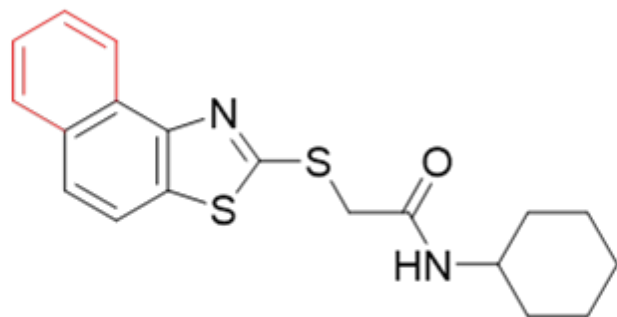

$^{13}\text{C}$  NMR ( $\text{CDCl}_3$ , 125 MHz)

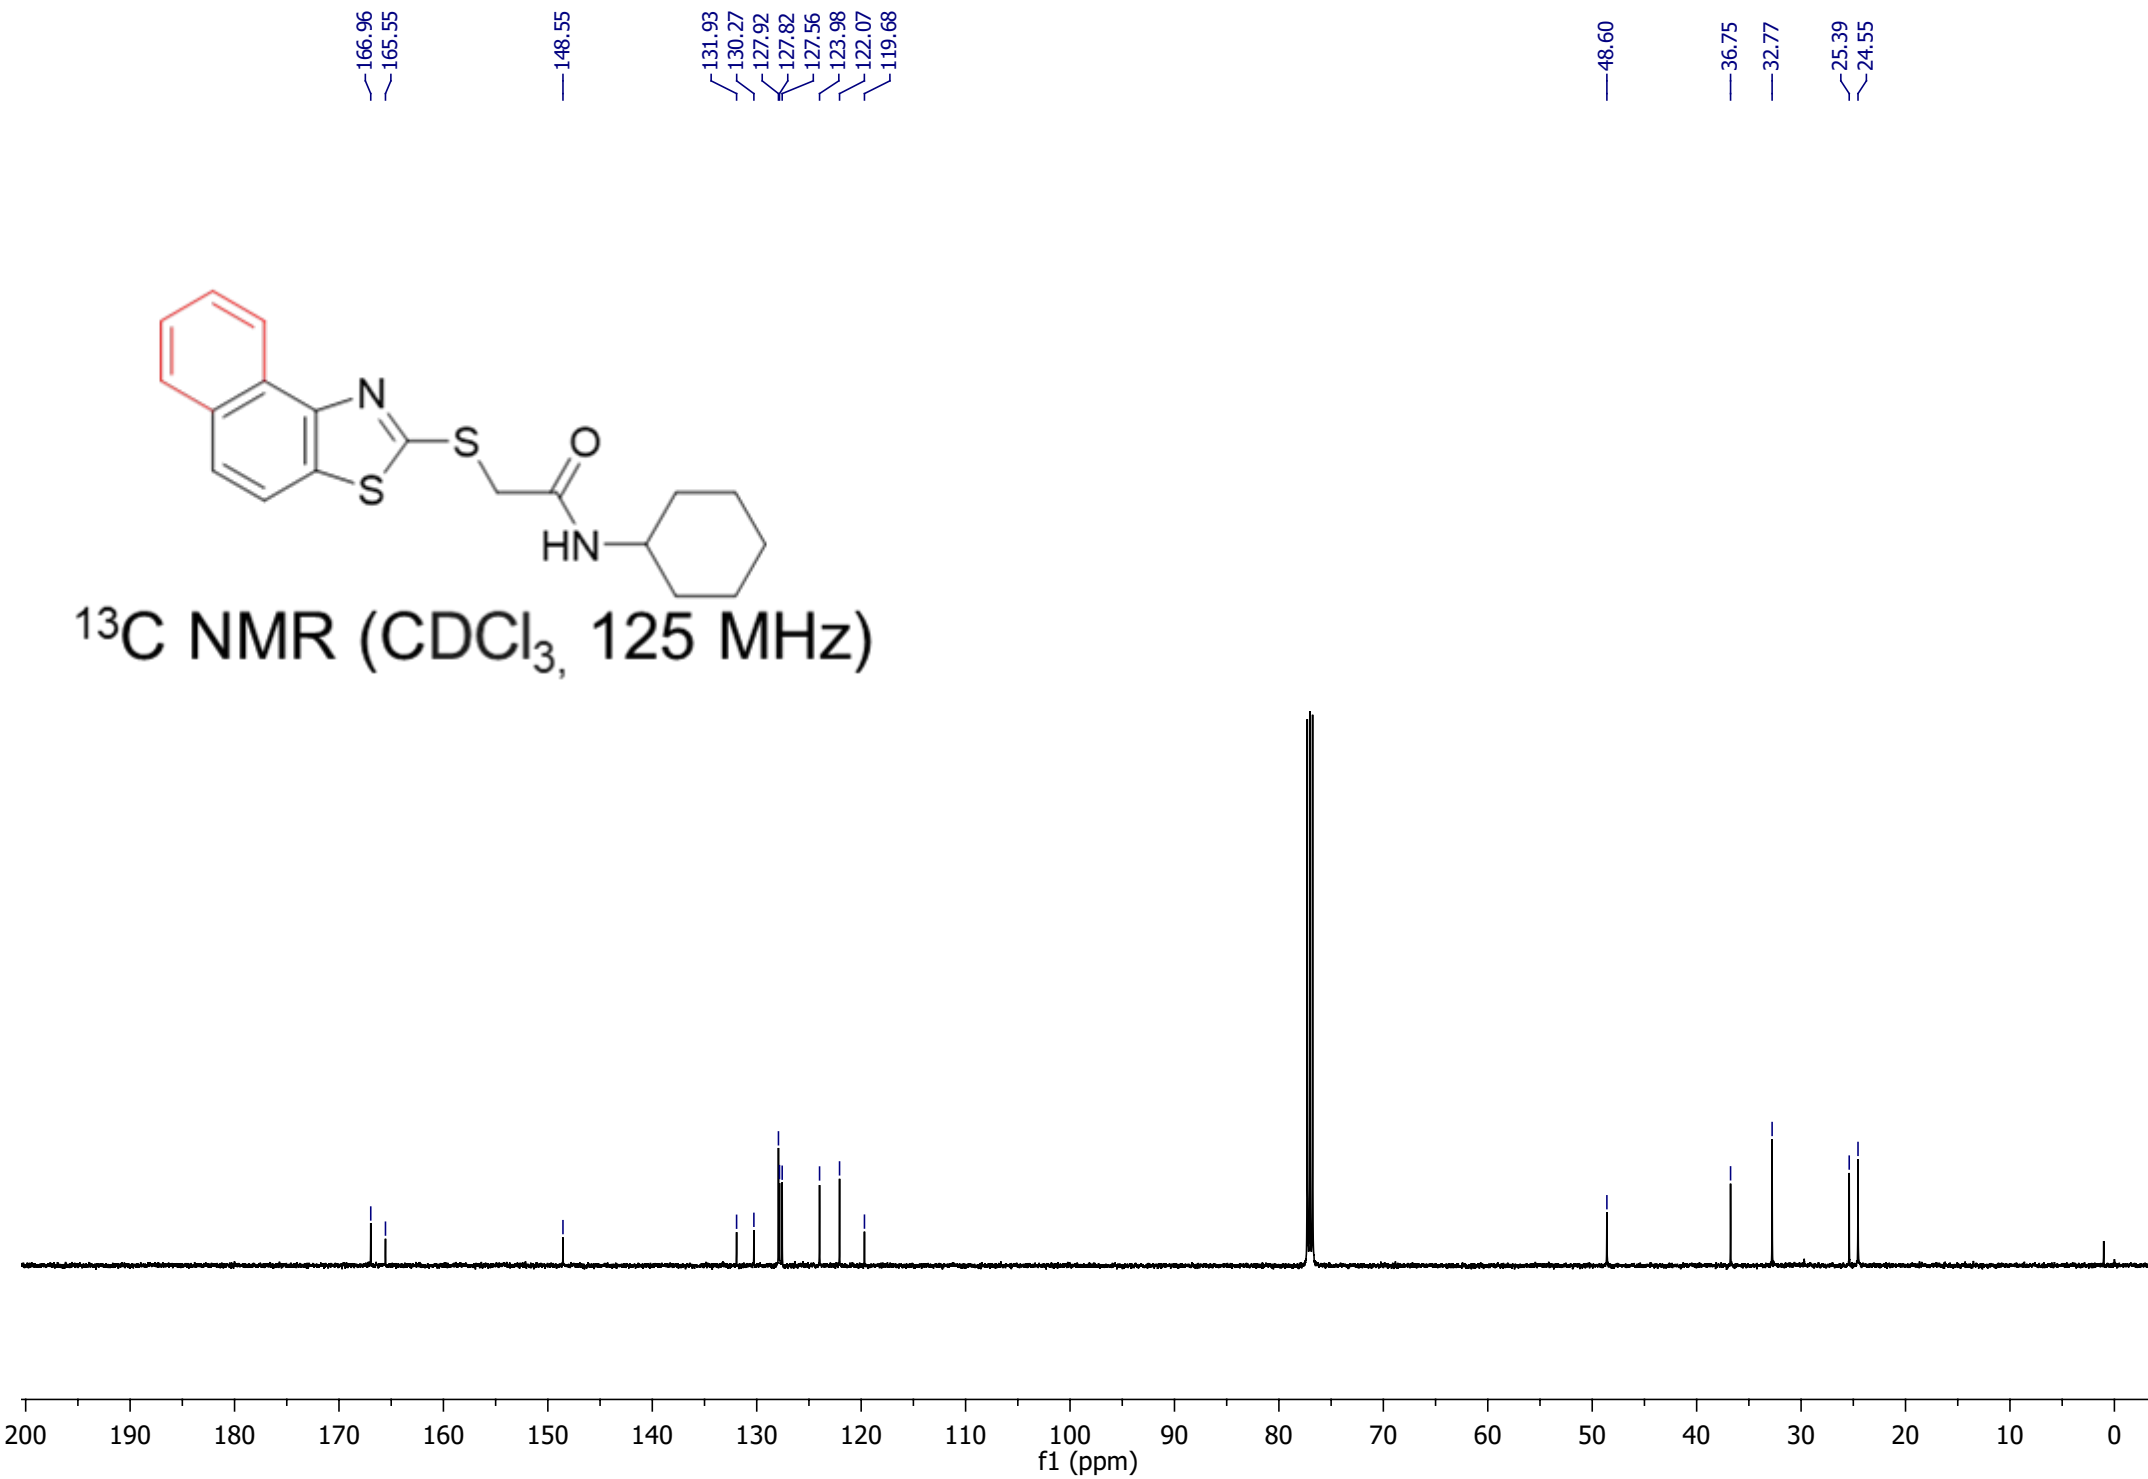

Supplement: d4md00118d1.pdf [file d4md00118d1.pdf]
